# Supplementary material for: Functional characterization of snoRNA-derived RNA (sdRNA) expression in healthy hematopoiesis and acute myeloid leukemia
Source: Research Square preprint supplement (doi:10.21203/rs.3.rs-8423046/v1), 2026-01-14
Supplement: Supplementary file 1 [file f451d87a800677a86ea24378.xlsx]

## Sheet: cloning sequences sgRNAs
Oligo name	Sequence 5'-3'
GAS5 US fwd	CACCGACTCTTATATACAGGAGCCC
GAS5 US rev	AAACGGGCTCCTGTATATAAGAGTC
GAS5 DS fwd	CACCGTTGCCCAGGCTGGAGTGCAA
GAS5 DS rev	AAACTTGCACTCCAGCCTGGGCAAC
SNORD78 US fwd	CACCGTTTCAAAGTTGTCTGTCACA
SNORD78 US rev	AAACTGTGACAGACAACTTTGAAAC
SNORD78 DS fwd	CACCGCCTTGAGCATGTTTGGAACG
SNORD78 DS rev	AAACCGTTCCAAACATGCTCAAGGC
SNORD93 US fwd	CACCGTGGGCCGAGTGGAAAGAATT
SNORD93 US rev	AAACAATTCTTTCCACTCGGCCCAC
SNORD93 DS fwd	CACCGGGTAAAAGGGAAAAAGCTCT
SNORD93 DS rev	AAACAGAGCTTTTTCCCTTTTACCC

## Sheet: cloning sequ. overexpressio
Oligo name	Sequence 5'-3'
sd5'SNORD44 fwd	GATCCCCTGGATGATGATAAGCAAATGCTGACTTTTTTG
sd5'SNORD44 rev	AATTCAAAAAAGTCAGCATTTGCTTATCATCATCCAGGG
sd3'SNORD74 fwd	GATCCAGTAATGATGAATGCCAACCGCTCTGATGTTTTTG
sd3'SNORD74 rev	AATTCAAAAACATCAGAGCGGTTGGCATTCATCATTACTG
sd3'SNORD76 fwd	GATCCTAGAATGATGAGGATCTTAACCACCATTATCTTAACTGAGGTTTTTG
sd3'SNORD76 rev	AATTCAAAAACCTCAGTTAAGATAATGGTGGTTAAGATCCTCATCATTCTAG
sd3'SNORD78 fwd	GATCCTGAGCATGTAGACAAAGGTAACACTGATTTTTG
sd3'SNORD78 rev	AATTCAAAAATCAGTGTTACCTTTGTCTACATGCTCAG
sd5'SNORD93 fwd	GATCCGCCAAGGATGAGAACTCTAATCTGATTTTTTTTG
sd5'SNORD93 rev	AATTCAAAAAAAATCAGATTAGAGTTCTCATCCTTGGCG
SNORD44 FL fwd	GATCCCCTGGATGATGATAAGCAAATGCTGACTGAACATGAAGGTCTTAATTAGCTCTAACTGACTAATTTTTG
SNORD44 FL rev	AATTCAAAAATTAGTCAGTTAGAGCTAATTAAGACCTTCATGTTCAGTCAGCATTTGCTTATCATCATCCAGGG
SNORD74 FL fwd	GATCCCTGCCTCTGATGAAGCCTGTGTTGGTAGGGACATCTGACAGTAATGATGAATGCCAACCGCTCTGATGGTGGTTTTTG
SNORD74 FL rev	AATTCAAAAACCACCATCAGAGCGGTTGGCATTCATCATTACTGTCAGATGTCCCTACCAACACAGGCTTCATCAGAGGCAGG
SNORD76 FL fwd	GATCCTGCCACAATGATGACAGTTTATTTGCTACTCTTGAGTGCTAGAATGATGAGGATCTTAACCACCATTATCTTAACTGAGGCTTTTTG
SNORD76 FL rev	AATTCAAAAAGCCTCAGTTAAGATAATGGTGGTTAAGATCCTCATCATTCTAGCACTCAAGAGTAGCAAATAAACTGTCATCATTGTGGCAG
SNORD78 FL fwd	GATCCGTGTAATGATGTTGATCAAATGTCTGACCTGAAATGAGCATGTAGACAAAGGTAACACTGAAGAATTTTTG
SNORD78 FL rev	AATTCAAAAATTCTTCAGTGTTACCTTTGTCTACATGCTCATTTCAGGTCAGACATTTGATCAACATCATTACACG
SNORD93 FL fwd	TGGCCAAGGATGAGAACTCTAATCTGATTTTATGTGCTTCTGCTGTGATGGATTAAAGGATTTACCTGAGGCCA
SNORD93 FL rev	TGGCCTCAGGTAAATCCTTTAATCCATCACAGCAGAAGCACATAAAATCAGATTAGAGTTCTCATCCTTGGCCA

## Sheet: RT-qPCR primers
Oligo name	Sequence 5'-3'
qPCR GAPDH fwd	CATCACTGCCACCCAGAAGAC
qPCR GAPDH rev	CAGTGAGCTTCCCGTTCAGC
qPCR SNORD44 fwd	CCTGGATGATGATAAGCAAATGC
qPCR SNORD44 rev	TTAAGACCTTCATGTTCAGTC
RT SNORD44	AGTCAGTTAGAGCTAATTAAGACC
RT sd5‘SNORD44	AGGCGAGCCTAGGTAGTCAGCATTTGCT
qPCR sd5'SNORD44 fwd	CCTGGATGATGATAAGCA
qPCR sd5'SNORD44 rev	GGCGAGCCTAGGTAGTCAGC
qPCR SNORD74 fwd	CTGCCTCTGATGAAGCCTG
qPCR SNORD74 rev	CTCAGATGTCCCTACCAAC
RT sd3'SNORD74	AGGCGAGCCTAGGTCATCAGAGCGGTTG
qPCR sd3'SNORD74 fwd	AGTAATGATGAATGCCAACC
qPCR sd3'SNORD74 rev	GGCGAGCCTAGGTCATCAGA
qPCR SNORD76 fwd	TGCCACAATGATGACAGTTTATT
qPCR SNORD76 rev	GGCGAGCCTAGGTCCTCAGT
RT sd3'SN76	AGGCGAGCCTAGGTCCTCAGTTAAGATAAT
qPCR sd3'SNORD76 fwd	TAGAATGATGAGGATCTTAA
qPCR sd3'SNORD76 rev	GGCGAGCCTAGGTCCTCAGT
qPCR SNORD78 fwd	GTGTAATGATGTTGATCAAATGTC
qPCR SNORD78 rev	GTGTACCGAAAGAACAAGGC
RT sd3'SNORD78	AGGCGAGCCTAGGTTTCAGTGTTACCTT
qPCR sd3'SNORD78 fwd	TGAGCATGTAGACAAAGG
qPCR sd3'SNORD78 rev	GGCGAGCCTAGGTTTCAGTG
qPCR SNORD93 fwd	ATCCTGGCCAAGGATGAGAACT
qPCR SNORD93 rev	ATCCTGGCCTCAGGTAAATCCT
RT sd5'SNORD93	AGGCGAGCCTAGGTAAATCAGATTAGAG
qPCR sd5'SNORD93 fwd	GCCAAGGATGAGAACTCT
qPCR sd5'SNORD93 rev	GGCGAGCCTAGGTAAATCAG
qPCR NUDT21 fwd	TTGCAATTTGTGGAGGGTGG
qPCR NUDT21 rev	GGATGACTGGCTCACGTACT

## Sheet: Limma_sd3SN78OE_vs_ctrl proteom
SYMBOL	logFC	AveExpr	t	P.Value	adj.P.Val
APOBEC3G	-1.60265	28.0109	-18.3155	5.5753e-06	0.0161985
TRAF6	3.72734	22.7162	15.6782	1.25047e-05	0.0161985
RPL32	-1.40618	30.2508	-14.8008	1.68481e-05	0.0161985
HMGN2	1.56497	31.6139	14.6753	1.76065e-05	0.0161985
ANP32E	-1.26664	30.2257	-14.2835	2.02481e-05	0.0161985
VPRBP	1.66064	27.4163	12.9691	3.32936e-05	0.0221958
ATP5L	-1.38345	30.642	-12.1336	4.68504e-05	0.0240616
RFC3	-1.01964	28.0719	-11.8944	5.18774e-05	0.0240616
NDUFS4	-1.38976	25.5607	-11.4844	6.20558e-05	0.0240616
ARF4	-1.22365	27.1596	-11.3826	6.49396e-05	0.0240616
SEC61A1	-1.26512	28.7378	-11.1699	7.14925e-05	0.0240616
NUTF2	-1.40116	30.7405	-11.0828	7.44011e-05	0.0240616
RPL7L1	-1.42398	26.9679	-10.7624	8.63706e-05	0.0240616
HSP90AB2P	-1.60802	31.2408	-10.7398	8.72953e-05	0.0240616
ATP5I	-2.16671	26.3076	-10.6701	9.02309e-05	0.0240616
PCBD1	-1.6704	24.7759	-10.3246	0.000106615	0.0257126
HAT1	-0.997289	29.4893	-10.2744	0.000109279	0.0257126
NUDT21	-1.35312	28.936	-9.98591	0.0001262	0.0276163
SYAP1	0.942302	25.1836	9.90967	0.000131178	0.0276163
KPNA6	-1.62147	28.0132	-9.7735	0.000140656	0.0278054
LDB1	0.900457	25.4156	9.49494	0.000162688	0.0278054
SRSF4	1.31179	26.4579	9.46059	0.000165678	0.0278054
KIAA1211	-1.22544	24.3277	-12.135	0.00017844	0.0278054
TIMM44	-0.902614	28.8861	-9.26385	0.000184108	0.0278054
EXOSC3	0.842644	29.4178	9.10158	0.000201149	0.0278054
ANP32A	-0.923701	32.0415	-9.01213	0.000211336	0.0278054
LDHA	-0.897563	34.5393	-8.97857	0.000215314	0.0278054
COX5A	-1.31299	29.7314	-8.94341	0.000219577	0.0278054
UQCRH	0.90439	29.539	8.93767	0.000220283	0.0278054
MBD1	0.857812	25.9386	8.85491	0.000230756	0.0278054
CNKSR3	-0.75486	25.6644	-8.68513	0.000254135	0.0278054
CDO1	-0.949851	26.8438	-8.67365	0.000255814	0.0278054
CUTA	-0.842045	28.4847	-8.66272	0.000257425	0.0278054
DLGAP4	-0.895917	24.9705	-8.59237	0.000268085	0.0278054
NME1	-1.03845	30.3641	-8.58751	0.000268841	0.0278054
BCR	-1.12335	26.0633	-8.57715	0.000270459	0.0278054
PSAT1	-0.781959	29.7768	-8.5522	0.000274405	0.0278054
DLST	-0.735563	28.6507	-8.5476	0.00027514	0.0278054
DNAJC19	-1.06294	26.5796	-8.54426	0.000275675	0.0278054
SLC39A14	1.52471	26.0622	10.4097	0.000337698	0.0312485
RPS9	-0.700557	31.7226	-8.24893	0.000328224	0.0312485
RTCA	0.897752	26.4477	8.17893	0.000342358	0.0312485
DDX39B	-0.726834	32.3946	-8.13395	0.000351817	0.0312485
CPSF3	0.807847	29.1393	8.09986	0.000359193	0.0312485
MARCKS	-0.754741	30.304	-8.06953	0.000365907	0.0312485
RAB34	1.00223	25.2244	9.84627	0.000425032	0.0324439
HMMR	1.05076	28.5444	8.00599	0.000380459	0.0312485
MT-ATP6	-1.34666	25.5843	-8.00546	0.000380583	0.0312485
FBXO30	0.831093	24.384	7.99606	0.000382794	0.0312485
ANP32B	-1.49224	30.4264	-7.93789	0.000396818	0.0314344
HMBS	-1.05928	26.6001	-7.92186	0.000400788	0.0314344
WDR77	-1.02515	29.7016	-7.80637	0.000430812	0.0324439
SLC29A1	-0.880652	29.0234	-7.78015	0.000437993	0.0324439
GPS1	-0.744044	27.9437	-7.73136	0.000451732	0.0325208
MRPS27	-0.709226	26.1037	-7.719	0.000455292	0.0325208
RPL23A	-0.728008	31.2527	-7.64948	0.000475946	0.0328122
FIS1	-0.982683	26.2856	-7.63498	0.000480392	0.0328122
INIP	2.60135	23.9394	7.62339	0.00048398	0.0328122
RPL36	-0.935105	30.0034	-7.58354	0.00049656	0.033104
LYRM7	0.846729	26.0943	7.44756	0.000542474	0.0350643
RPS13	-0.876661	31.0139	-7.41952	0.000552552	0.0350643
USP9X	-0.715264	25.8164	-7.3964	0.000561029	0.0350643
GGA1	0.707583	26.9375	7.36268	0.000573665	0.0353025
AGK	-1.10925	28.5383	-7.20083	0.000639173	0.0383661
THAP5	-1.64056	25.4052	-7.19283	0.000642633	0.0383661
TMCO1	-0.743447	26.9203	-7.15327	0.000660062	0.0388272
CWC27	0.651933	26.9705	7.07294	0.000697197	0.0404172
SNRPE	1.03594	30.1416	7.02662	0.000719725	0.0406683
PHC2	-1.45465	25.9421	-7.02231	0.000721863	0.0406683
TRAPPC3	0.662528	27.2517	6.95378	0.000756896	0.0420498
LRRC59	-0.637017	31.4113	-6.91996	0.00077492	0.0424614
CNOT7	-0.761886	26.1245	-6.8807	0.000796474	0.042868
TRIM24	-0.626997	28.2399	-6.86023	0.000807995	0.042868
UBE2A	1.46693	25.575	7.98168	0.00100325	0.0441573
EP300	0.63689	24.2044	6.83026	0.000825209	0.042868
LAMP2	-0.658065	26.9308	-6.81064	0.000836716	0.0429085
POU2F1	-0.574492	25.4532	-6.72502	0.000889169	0.0441573
HADH	-0.800354	31.35	-6.72485	0.000889276	0.0441573
RPL7A	-0.62667	32.1549	-6.71231	0.000897278	0.0441573
ATXN3	1.28316	23.5904	7.70957	0.00115431	0.0452428
EEF1A1	-0.628191	36.522	-6.65277	0.000936438	0.0441573
ZNF598	0.75564	25.5178	6.62685	0.000954114	0.0441573
SRP9	0.63727	29.8975	6.60354	0.000970347	0.0441573
IDH2	-0.564359	32.0973	-6.58694	0.000982099	0.0441573
GPI	-0.59878	32.3884	-6.56482	0.000998016	0.0441573
TAMM41	0.74968	25.5403	6.5459	0.00101188	0.0441573
WDR11	-1.36387	25.9253	-6.53936	0.00101672	0.0441573
NDUFB3	-0.852321	24.6783	-6.5029	0.00104422	0.0441573
HIBCH	-0.677254	27.7942	-6.48287	0.0010597	0.0441573
SLC3A2	-0.590937	30.7572	-6.47976	0.00106213	0.0441573
EPN1	0.690484	25.9463	6.47804	0.00106347	0.0441573
PSME2	-0.792752	29.5346	-6.47749	0.00106391	0.0441573
EIF3F	-0.603952	30.1832	-6.4687	0.00107082	0.0441573
RPS28	0.620263	29.7184	6.42715	0.00110419	0.0450689
STMN2	-0.573999	31.0717	-6.37205	0.00115035	0.0452428
IRGQ	1.24759	26.0607	6.36426	0.00115705	0.0452428
MYL12A	-0.769839	30.4446	-6.35571	0.00116447	0.0452428
AP2A1	-0.610343	29.8965	-6.32914	0.00118786	0.0452428
INTS4	0.784425	25.1885	7.20136	0.00151834	0.0460104
HEXA	-0.856533	27.4474	-6.30221	0.00121213	0.0452428
TSFM	0.768223	27.9951	6.2988	0.00121525	0.0452428
DNM3	0.654596	25.9653	6.29017	0.00122317	0.0452428
THOC5	-1.07288	28.0497	-6.27774	0.0012347	0.0452428
DBI	-0.797159	30.8595	-6.27087	0.00124111	0.0452428
PSMA7	-0.621807	31.2881	-6.27063	0.00124134	0.0452428
RPLP0	-0.617054	32.1002	-6.26057	0.00125082	0.0452428
EXOSC7	0.631878	28.0406	6.25387	0.00125717	0.0452428
UQCRC2	-0.524331	31.0793	-6.24157	0.00126894	0.0452428
UPF3B	0.664248	25.6755	6.22942	0.0012807	0.0452428
RPS29	-0.569679	28.2793	-6.22049	0.00128942	0.0452428
MYH14	-0.963182	26.3834	-6.19553	0.00131416	0.0456219
CERS2	-0.868201	26.5426	-6.18671	0.00132303	0.0456219
CLIC1	-0.583794	31.3296	-6.17453	0.00133541	0.045655
RAB8A	-0.828597	28.5046	-6.12944	0.0013824	0.0460104
UBE3A	1.55266	25.161	6.10736	0.00140611	0.0460104
ZNF280C	-0.74863	25.7768	-6.10147	0.00141252	0.0460104
MED1	-1.3423	24.5525	-6.07957	0.00143664	0.0460104
AP1G1	-0.828894	28.0891	-6.0777	0.00143872	0.0460104
PSMG3	-1.15463	25.0931	-6.88211	0.00181956	0.0488853
FAM213A	0.781725	26.2961	6.07077	0.00144646	0.0460104
CYB5B	-0.621444	28.9739	-6.06012	0.00145846	0.0460104
RBM27	-0.62142	26.7775	-6.04363	0.00147727	0.0460104
CWC22	-0.955763	26.1444	-6.02466	0.00149926	0.0460104
CCNH	-0.750848	26.1675	-6.81061	0.00189671	0.0495128
KLC1	-0.735565	28.2124	-6.015	0.0015106	0.0460104
DSTN	0.52548	28.2837	6.0125	0.00151355	0.0460104
EXOSC8	0.657739	27.843	6.00862	0.00151814	0.0460104
MPO	-0.517994	34.4416	-5.99452	0.00153498	0.0461647
SMC6	0.761905	26.4549	5.96288	0.00157355	0.0462427
ERGIC3	-0.711706	26.3425	-5.95262	0.0015863	0.0462427
RBX1	0.673148	27.4056	5.95239	0.00158659	0.0462427
PRPF40A	-0.629134	29.36	-5.946	0.00159459	0.0462427
RRM2	-0.508406	28.7792	-5.94538	0.00159537	0.0462427
RAB33A	-0.85134	25.8436	-5.89315	0.00166263	0.0476372
CRYZ	-0.561217	28.4351	-5.88065	0.00167921	0.0476372
PAPD5	1.14803	23.1464	6.5953	0.0021543	0.0508606
GNG5	-0.994455	30.0338	-5.8467	0.00172522	0.0482578
NAP1L1	-0.513636	32.834	-5.81765	0.00176577	0.0488853
FTSJ1	0.690898	24.2083	6.50781	0.00227102	0.0508606
COX5B	-0.742487	28.5153	-5.79326	0.00180067	0.0488853
NDUFAB1	0.750605	28.8881	5.7833	0.00181516	0.0488853
BRI3BP	-1.04665	24.3788	-5.78049	0.00181927	0.0488853
HSPA8	-0.528759	35.2705	-5.77932	0.00182098	0.0488853
GOLGA8N	-1.02428	24.87	-6.47257	0.00232019	0.0508606
GSTM1	-0.675096	28.2082	-5.75024	0.00186422	0.0492709
UBE2L3	-0.549962	31.4385	-5.74904	0.00186603	0.0492709
MRPL19	1.10491	27.1108	5.74489	0.00187229	0.0492709
SET	-0.521866	32.2111	-5.70636	0.00193172	0.0495128
NUP85	-0.621863	28.7638	-5.70474	0.00193427	0.0495128
PGD	-0.614393	33.1407	-5.70208	0.00193847	0.0495128
COPS3	-0.5549	28.109	-5.69897	0.00194338	0.0495128
UMPS	-0.724475	29.0421	-5.68679	0.00196275	0.0496898
HSD17B12	-0.525603	29.5914	-5.6722	0.00198626	0.0498048
DHCR24	-1.14495	26.5708	-5.66855	0.00199219	0.0498048
MCTS1	-0.625153	28.5989	-5.63616	0.00204575	0.050549
CORO1C	0.474808	30.2162	5.62948	0.002057	0.050549
HIST1H2BM	0.502461	37.0038	5.62372	0.00206677	0.050549
MT-CO2	-0.57582	29.9895	-5.62035	0.00207251	0.050549
ZNF184	0.74615	24.9924	6.25654	0.00265159	0.0542227
RPLP2	-0.607249	32.5835	-5.58658	0.00213101	0.0508606
NMRAL1	-1.65889	26.0363	-5.5712	0.00215831	0.0508606
API5	-0.981644	29.6785	-5.57094	0.00215877	0.0508606
C12orf29	-0.737253	25.0798	-5.56918	0.00216191	0.0508606
ARPC5L	-1.05047	26.6326	-5.5648	0.00216978	0.0508606
EXOC6	0.996085	24.124	6.19002	0.00276501	0.0545609
YWHAB	-0.49312	31.8136	-5.55406	0.00218918	0.0508606
KIF20B	1.34781	30.6818	5.54074	0.00221355	0.0508606
PPP1CA	-0.465062	31.5247	-5.53462	0.00222485	0.0508606
DEK	-0.742636	29.7093	-5.51113	0.00226883	0.0508606
SLC25A24	-0.548924	26.9475	-5.5039	0.00228258	0.0508606
FDFT1	-0.609814	29.047	-5.49859	0.00229273	0.0508606
SEC61G	1.06271	27.3231	5.4947	0.00230019	0.0508606
NKRF	0.559958	27.2657	5.48428	0.00232036	0.0508606
HMGA1	-0.530894	29.4999	-5.47443	0.00233959	0.0508606
TMEM33	-0.487758	24.3116	-5.44811	0.00239193	0.0513963
NPEPL1	0.631374	23.2102	6.02243	0.00307794	0.0569989
RPS15	-0.479681	30.3533	-5.43664	0.00241516	0.0513963
CD99L2	0.599112	25.2826	5.4315	0.00242566	0.0513963
METAP2	1.03397	26.6915	5.42904	0.00243069	0.0513963
GPATCH4	-0.704803	26.1084	-5.42387	0.00244132	0.0513963
DOK1	0.484338	28.3107	5.40943	0.00247133	0.0517556
CD226	-1.28848	26.5854	-5.37265	0.00254966	0.053118
SP3	0.659036	25.4938	5.93645	0.0032551	0.0588211
RPS27L	-0.752163	26.8278	-5.36049	0.00257622	0.0533931
RCOR1	-0.65006	27.1313	-5.32746	0.00264991	0.0542227
VPS28	-0.522309	27.7083	-5.32438	0.00265691	0.0542227
VAT1	-0.618735	29.491	-5.30554	0.00270019	0.0545609
LSM1	-0.714574	27.7513	-5.2881	0.00274098	0.0545609
RPS24	-0.448087	30.3033	-5.28506	0.00274816	0.0545609
STAT5B	-0.566055	28.2499	-5.27559	0.00277066	0.0545609
TIMM9	-0.492741	28.1192	-5.27115	0.00278131	0.0545609
CNOT2	0.889123	26.7797	5.26599	0.00279371	0.0545609
RPS19	-0.453688	31.849	-5.26032	0.00280743	0.0545609
H3F3A	-1.49872	31.2074	-5.25951	0.00280939	0.0545609
SLC25A6	0.539266	28.6273	5.24017	0.00285681	0.0545609
RHEB	0.525005	27.1501	5.23947	0.00285854	0.0545609
THOC7	-0.912283	26.872	-5.23745	0.00286354	0.0545609
GAK	0.496319	25.7104	5.23403	0.00287204	0.0545609
EIF3L	-0.446776	30.2724	-5.23213	0.00287679	0.0545609
EIF3E	-0.448791	30.4061	-5.23161	0.00287809	0.0545609
DDX54	-0.466739	28.0871	-5.21983	0.00290765	0.0548614
ANAPC5	-0.682892	25.0872	-5.72635	0.00374272	0.063325
LGALS12	-1.82938	25.0113	-5.70761	0.00379039	0.063325
ARIH2	1.4408	26.0252	5.69883	0.00381297	0.063325
RAB10	-0.594025	29.3276	-5.18534	0.00299633	0.0560062
GEMIN4	-0.834856	26.2693	-5.16824	0.00304144	0.0565849
SATB1	-0.534366	28.3663	-5.14364	0.00310776	0.0571627
NHP2L1	-0.640246	29.7344	-5.14085	0.00311537	0.0571627
MAPK15	-0.794891	27.7271	-5.1311	0.0031422	0.0573918
BAG6	-0.524478	28.0075	-5.10593	0.00321266	0.0584119
RAP1A	0.434398	28.0152	5.08779	0.00326457	0.0588211
SEL1L	0.78451	24.713	5.56467	0.00417905	0.0639759
STK38L	0.539357	24.0282	5.06324	0.00333642	0.0596287
RFT1	0.820073	24.7018	5.53079	0.00427813	0.0639759
RPS26	-0.538531	30.3244	-5.05501	0.0033609	0.0596287
TM9SF2	0.58803	28.1083	5.04479	0.0033916	0.0596287
TWF2	0.462633	29.7673	5.04381	0.00339457	0.0596287
UTP11L	0.676375	25.996	5.0424	0.00339883	0.0596287
ACADS	-0.639219	24.97	-5.0293	0.00343875	0.0600655
STAT5A	-0.604445	29.9647	-4.99329	0.00355133	0.0617622
LSM5	0.418657	29.1503	4.97509	0.00360983	0.0625078
C14orf142	0.641872	27.2423	4.95408	0.00367879	0.063325
NCBP2	0.539572	27.2655	4.94671	0.00370331	0.063325
SLU7	0.547142	24.5101	5.37768	0.00476288	0.0670349
INF2	0.545934	26.5215	4.93677	0.00373674	0.063325
PTP4A2	-0.708695	26.5924	-4.91659	0.0038056	0.063325
HPCAL1	-0.895057	24.9063	-4.91378	0.00381533	0.063325
DAD1	0.69273	29.1455	4.90557	0.00384384	0.0635346
RALB	-0.690375	26.4935	-4.90102	0.00385976	0.0635351
AASDHPPT	-0.805035	28.2413	-4.88686	0.00390981	0.0639518
IPO5	-0.497826	31.4914	-4.88341	0.0039221	0.0639518
HIST1H3A	0.694441	35.2076	4.87939	0.0039365	0.0639518
MAD2L1	-0.527646	27.5244	-4.86227	0.00399848	0.0639518
DYNLT3	0.99054	25.4228	4.86198	0.00399954	0.0639518
EXOSC5	-0.617052	28.1292	-4.86186	0.00399996	0.0639518
ENDOG	0.576658	25.7368	4.85811	0.00401371	0.0639518
OCIAD1	-0.575287	27.6099	-4.85534	0.00402389	0.0639518
RTF1	-0.500254	26.8404	-4.85064	0.00404123	0.0639518
VPS4A	0.699127	26.7003	4.84532	0.00406094	0.0639518
PEF1	-1.3235	26.7169	-4.83243	0.0041092	0.0639759
C9orf78	0.436036	27.2565	4.8255	0.00413542	0.0639759
RAP1GDS1	-0.941831	26.6434	-4.82175	0.00414971	0.0639759
C14orf166	-1.01217	28.6321	-4.80468	0.0042154	0.0639759
MRPS12	0.791007	26.1156	4.79863	0.00423894	0.0639759
COX7A2L	-0.911088	26.393	-4.78896	0.00427693	0.0639759
CDK13	-0.70751	24.08	-4.78804	0.00428058	0.0639759
METTL13	0.657266	26.5408	4.78768	0.00428197	0.0639759
OSTC	-0.631831	26.9664	-4.78549	0.00429067	0.0639759
ADH5	-0.445986	31.2188	-4.78461	0.00429417	0.0639759
DDAH1	-0.749322	28.0301	-4.78459	0.00429425	0.0639759
RPRD2	0.542713	27.0071	4.784	0.00429656	0.0639759
PDXP	-0.475056	25.9205	-4.78232	0.00430323	0.0639759
PFN1	0.432008	33.6091	4.77852	0.00431838	0.0639759
DEPTOR	-0.439717	27.3211	-4.77384	0.00433713	0.0640093
EYA3	-0.401101	24.7302	-4.76998	0.00435263	0.0640093
ATP5B	-0.498693	33.8976	-4.75093	0.00443016	0.0649108
CHAF1A	0.555804	26.8424	4.73507	0.00449592	0.0655378
MSRA	1.05972	25.847	4.73274	0.00450572	0.0655378
PRPF4	-0.449068	28.6513	-4.72495	0.00453852	0.0657757
RP2	0.710413	25.6668	4.69899	0.00464982	0.0669632
ZCWPW1	0.684907	24.1131	4.69804	0.00465394	0.0669632
ACTR1A	0.39884	29.9322	4.67952	0.00473537	0.0670349
LAMTOR5	-0.462206	28.4972	-4.67914	0.00473705	0.0670349
ACSL3	0.50288	27.4846	4.67586	0.00475166	0.0670349
SCAMP1	0.452645	27.8784	4.6747	0.00475684	0.0670349
PAAF1	1.04534	26.6565	4.66722	0.00479037	0.0670349
MRPL46	0.680906	26.5017	4.66384	0.00480558	0.0670349
PSAP	-0.492291	29.7236	-4.66292	0.00480975	0.0670349
UBE2E2	-0.763428	26.8679	-4.64347	0.00489859	0.067747
RNGTT	1.23087	25.3761	4.64133	0.00490849	0.067747
GLTSCR2	1.15196	25.6221	4.63662	0.00493035	0.067747
G3BP2	-0.568696	29.5301	-4.63253	0.00494943	0.067747
PPHLN1	-0.521168	27.0724	-4.62974	0.00496247	0.067747
DHX36	0.407804	27.7188	4.60725	0.00506916	0.0686074
PDPR	0.47802	26.7239	4.60667	0.00507197	0.0686074
EIF3J	-0.543842	28.6707	-4.59942	0.00510694	0.0686074
TSN	-0.501305	30.2152	-4.59925	0.00510779	0.0686074
TOR1AIP1	-0.629572	28.7647	-4.59853	0.00511125	0.0686074
RAD18	0.572979	25.3085	4.58704	0.00516734	0.068799
TBC1D4	0.677441	25.2672	4.58538	0.00517547	0.068799
ATXN2	0.618796	26.8608	4.58505	0.00517713	0.068799
MYBBP1A	-0.444028	29.3833	-4.57525	0.00522558	0.0688833
LAGE3	-0.395949	26.5075	-4.57397	0.00523195	0.0688833
DNAJB1	0.609999	30.2549	4.5677	0.00526331	0.0688833
ERLIN1	-0.404602	28.4143	-4.56645	0.00526957	0.0688833
IWS1	0.673644	26.7694	4.5572	0.00531627	0.0692674
MIA2	0.65056	25.095	4.88365	0.00684978	0.0761087
ENO1	0.402168	35.2973	4.54411	0.00538315	0.0698732
RBM4	0.421232	29.5987	4.54055	0.00540151	0.0698732
LAMTOR3	0.534145	27.2601	4.53696	0.00542012	0.0698732
TIMM50	-0.402679	28.9707	-4.52856	0.00546389	0.0700499
HSP90AB4P	0.708984	30.0259	4.84893	0.00703424	0.0770875
EIF5	-0.466829	29.7062	-4.51821	0.0055184	0.070298
ALDH3A2	0.529477	26.8636	4.51123	0.00555548	0.0705458
AIMP2	-0.780422	29.0228	-4.50465	0.00559075	0.0707689
ATPAF2	-0.972381	25.0557	-4.81977	0.00719376	0.0770974
EED	-1.3357	25.3739	-4.49148	0.00566206	0.0713817
RPS2	-0.541911	32.0463	-4.48588	0.00569269	0.0713817
RPL39P5	-0.884579	28.5583	-4.47789	0.00573678	0.0717097
HK1	-0.397195	31.2308	-4.47448	0.00575568	0.0717218
TOPBP1	0.622646	24.6584	4.46751	0.00579459	0.0719824
YTHDF1	0.527862	28.02	4.45604	0.00585926	0.0721387
MRPL47	1.04444	25.5143	4.45568	0.00586127	0.0721387
GM2A	-0.49038	25.4555	-4.76878	0.00748328	0.0787462
UTP18	-0.374693	29.2964	-4.45245	0.00587965	0.072143
DUSP12	-1.00068	25.344	-4.76116	0.00752773	0.0788244
SPATS2	0.51938	29.5278	4.7509	0.0075881	0.0790428
ACTB	0.590695	32.1908	4.43279	0.00599288	0.0723232
RER1	0.843804	26.0457	4.43249	0.0059946	0.0723232
STX5	-0.414884	25.7042	-4.42891	0.00601552	0.0723232
IPO11	-0.865859	26.7515	-4.42869	0.0060168	0.0723232
GSK3A	0.558746	25.5889	4.42361	0.00604662	0.0723232
MPDU1	-0.421565	26.308	-4.4214	0.00605961	0.0723232
VAPA	-0.454773	30.9755	-4.42023	0.00606655	0.0723232
DDX6	-0.396965	30.1228	-4.41662	0.0060879	0.0723232
RCN1	0.435256	29.8243	4.41228	0.00611368	0.0723232
RPA3	0.438992	29.3201	4.4117	0.00611716	0.0723232
EGLN1	-0.702081	25.5496	-4.41129	0.00611961	0.0723232
DHODH	0.483325	24.7232	4.7135	0.00781312	0.079767
DNAJC8	-0.538502	30.3647	-4.40689	0.00614591	0.0723232
CDCA8	-0.545292	25.8404	-4.40663	0.00614747	0.0723232
CHP1	0.64625	25.9317	4.39639	0.00620921	0.0728353
MAP4K4	-0.51636	27.1416	-4.39287	0.00623061	0.0728727
HINT1	-0.459476	31.3674	-4.38617	0.00627153	0.0731373
FDPS	-0.38947	30.2398	-4.37401	0.00634666	0.073633
CCT4	-0.367331	33.1733	-4.37334	0.00635084	0.073633
G3BP1	-0.474739	31.4685	-4.37019	0.00637049	0.0736473
EXOSC1	0.438512	26.6632	4.36088	0.00642894	0.0741089
SPN	-0.551812	25.131	-4.65107	0.00820672	0.0820672
PRKAR1A	-0.488221	28.2781	-4.34588	0.00652442	0.0746749
IPO4	-0.499902	28.2307	-4.34438	0.00653405	0.0746749
PPP4R2	-0.582696	27.9773	-4.33839	0.00657273	0.0749029
HARS	-0.399908	29.0939	-4.32604	0.00665319	0.0756044
MPHOSPH6	0.470513	26.2993	4.31928	0.00669777	0.0758954
PSME1	-0.393016	30.4892	-4.30787	0.00677375	0.0761087
SIN3A	0.367271	28.4945	4.30332	0.00680433	0.0761087
TTLL12	-0.357933	31.1301	-4.29964	0.00682914	0.0761087
SRSF10	0.419935	29.2354	4.29849	0.00683695	0.0761087
CREB1	0.59486	26.8247	4.29781	0.00684156	0.0761087
EIF2B4	-0.562445	26.9819	-4.28993	0.00689523	0.0764014
DAP3	-0.538261	28.1183	-4.28482	0.00693024	0.0765772
FAR1	0.656011	25.6922	4.27371	0.00700721	0.0770875
SWAP70	0.36003	26.4092	4.2725	0.00701559	0.0770875
ACSS1	-0.477643	27.4043	-4.26065	0.00709889	0.0770974
YWHAG	-0.360906	32.7565	-4.25559	0.00713475	0.0770974
PKN1	-0.471045	28.1039	-4.25381	0.00714741	0.0770974
GABARAPL2	0.830909	24.2889	4.2531	0.00715251	0.0770974
FANCD2	-0.425339	26.366	-4.24991	0.00717528	0.0770974
MLH1	-0.784736	26.1071	-4.24668	0.00719848	0.0770974
HSPB11	-0.642093	26.754	-4.24575	0.00720512	0.0770974
PPP6R1	0.421762	28.9053	4.24469	0.00721274	0.0770974
PSMD11	-0.353087	30.9843	-4.24259	0.00722788	0.0770974
PGAM1	-0.367919	33.2929	-4.23835	0.0072586	0.0772191
FAM96A	0.739496	24.2958	4.22634	0.00734629	0.0779447
WIPF1	-0.424779	28.6852	-4.2207	0.00738796	0.0781795
WNK1	-0.430915	28.3782	-4.21105	0.00745978	0.0787312
CTR9	-0.379531	27.1995	-4.19513	0.00758002	0.0790428
S100A4	-0.713036	27.0798	-4.18981	0.00762071	0.0791762
NSFL1C	0.348832	29.6215	4.18078	0.00769035	0.0796876
IVD	0.398009	26.4755	4.17828	0.00770977	0.0796876
STXBP4	0.995261	24.9365	4.4292	0.00981193	0.0922841
DOHH	0.648461	25.9642	4.17223	0.00775692	0.079767
PSMA1	-0.408201	30.8203	-4.16701	0.00779792	0.079767
POLR2G	-0.772988	25.6305	-4.16417	0.00782029	0.079767
DICER1	0.984262	27.7098	4.16205	0.0078371	0.079767
SUPV3L1	0.437789	27.4066	4.15326	0.00790704	0.0802745
GTF2I	-0.455335	31.9742	-4.14282	0.00799109	0.0809224
RPS6KA3	-0.475431	27.3026	-4.13683	0.00803976	0.0810275
MAP2K2	0.546196	28.633	4.13656	0.00804198	0.0810275
ZNF830	0.926501	25.5962	4.13104	0.00808718	0.0812782
CCT3	-0.363603	33.3736	-4.09809	0.00836293	0.0834092
RPL13	0.453285	31.5684	4.09578	0.00838262	0.0834092
RPL23	-0.364715	32.0158	-4.09215	0.00841376	0.0835113
SUMO1	-0.431295	29.4356	-4.08894	0.0084414	0.0835782
PPP4R1	0.808236	25.107	4.07899	0.0085277	0.0842242
PML	-0.687783	27.4182	-4.07089	0.0085987	0.0847163
PSMD10	-0.624365	29.1445	-4.06215	0.00867603	0.0852682
RECQL4	0.879356	24.4724	4.28982	0.0110131	0.0966684
SLC25A4	1.58527	24.908	4.28957	0.0110153	0.0966684
ST7	-0.33954	23.0462	-4.0449	0.00883101	0.0865786
TAGLN2	-0.343654	31.6869	-4.03188	0.00895015	0.0872314
WIZ	0.401353	26.9313	4.02889	0.00897779	0.0872314
NCK2	-0.713136	25.451	-4.02813	0.00898484	0.0872314
AKAP1	-0.501146	25.842	-4.24218	0.0114633	0.0982975
ASAH1	-0.630955	26.9367	-4.01939	0.00906612	0.0876228
UQCR10	0.960326	28.4588	4.01909	0.00906896	0.0876228
SEPT7	-0.38872	30.7534	-4.01173	0.0091381	0.0880561
DPY30	-0.806652	28.3374	-4.0092	0.00916205	0.0880561
DBN1	0.393474	30.4352	4.00732	0.00917984	0.0880561
TMED1	-0.521637	27.048	-4.00434	0.00920817	0.0880723
COMMD9	-0.951653	27.2432	-4.00252	0.00922558	0.0880723
MAPRE2	-0.758631	26.385	-3.98133	0.00943029	0.0898123
DDAH2	0.423414	27.9512	3.97462	0.00949619	0.090224
MAPK14	-0.345592	29.2816	-3.97235	0.00951863	0.090224
OGFOD1	0.452451	27.3913	3.95658	0.00967599	0.091283
FGFR1OP	0.881491	25.5981	3.94087	0.0098358	0.0922841
LYAR	-0.351976	29.8265	-3.9264	0.00998567	0.0929881
NOP10	-0.595373	27.2622	-3.92539	0.00999622	0.0929881
CWC15	-0.488025	26.4451	-3.92135	0.0100385	0.0931011
COPZ1	0.345272	28.9765	3.91979	0.0100549	0.0931011
MYDGF	-0.503464	29.1411	-3.90687	0.010192	0.0941523
PPA1	-0.370425	33.1128	-3.9046	0.0102163	0.0941595
DCXR	-0.416992	29.9053	-3.90152	0.0102494	0.0942471
LTA4H	-0.324147	31.1189	-3.88916	0.0103833	0.0950417
CXorf56	0.682061	24.8814	3.8825	0.0104563	0.0954911
GRIPAP1	1.51603	25.6701	3.87975	0.0104867	0.0955503
SH3GLB1	-0.473653	26.1166	-4.06281	0.0133671	0.105046
MAK16	-0.456141	27.2409	-3.87053	0.010589	0.0962635
IGSF8	-0.423658	24.8287	-4.05452	0.0134639	0.105599
PGK1	-0.324764	34.6166	-3.85978	0.0107098	0.0966684
PCBP2	-0.553372	30.9357	-3.85445	0.0107703	0.0966684
NDUFA13	-0.443392	26.739	-3.85236	0.0107941	0.0966684
RPL21	-0.543606	31.3401	-3.85231	0.0107946	0.0966684
ECI1	-0.502639	30.176	-3.84853	0.0108378	0.0966684
LRCH3	-0.949481	26.972	-3.84751	0.0108496	0.0966684
EXOC5	-0.441639	25.0542	-3.84345	0.0108963	0.0966684
UBE2K	-0.409653	29.1985	-3.84235	0.010909	0.0966684
ARF6	-0.835043	27.28	-3.83672	0.0109743	0.0966684
GAR1	0.650254	28.486	3.83296	0.011018	0.0966684
BPNT1	-0.421652	27.569	-3.83229	0.0110259	0.0966684
RBBP4	-0.326152	32.7162	-3.83012	0.0110513	0.0966684
UBE2I	-0.477621	30.328	-3.82865	0.0110685	0.0966684
IK	0.335768	29.1172	3.81937	0.0111782	0.0974133
KDM2A	0.637225	23.3718	3.80691	0.0113271	0.0980736
LRPPRC	-0.319527	32.1857	-3.80688	0.0113275	0.0980736
PPP2R5E	-0.507232	26.7536	-3.80081	0.011401	0.0982843
USP36	0.417079	26.2519	3.79464	0.0114762	0.0982975
TBC1D24	-0.768972	25.3839	-3.96705	0.0145366	0.108001
VPS25	-0.498674	27.6838	-3.78892	0.0115464	0.0986328
QDPR	-0.419281	28.8091	-3.78744	0.0115647	0.0986328
NUDT2	0.598663	26.6856	3.96099	0.0146146	0.108112
TRAPPC4	0.437747	24.2987	3.95742	0.0146608	0.108112
IVNS1ABP	1.41386	24.7049	3.95387	0.014707	0.108112
BST2	-0.346189	26.4244	-3.77833	0.0116777	0.0993846
CCDC101	0.442853	24.2423	3.94526	0.0148195	0.108568
PARL	0.711986	23.929	3.76291	0.0118719	0.100823
HNRNPH3	0.449097	31.9218	3.75355	0.0119916	0.101512
RPL10	-0.406293	31.9915	-3.7526	0.0120039	0.101512
CNST	-0.690846	25.1286	-3.74609	0.012088	0.101559
CYB5R3	-0.329968	30.231	-3.74549	0.0120957	0.101559
TNPO1	-0.421302	30.5054	-3.74296	0.0121287	0.101559
DNAJC9	0.354972	30.3249	3.74142	0.0121487	0.101559
RBM3	-0.852535	28.0917	-3.74091	0.0121554	0.101559
NUP205	-0.532598	28.9933	-3.74043	0.0121617	0.101559
LSG1	0.536896	25.37	3.73577	0.0122227	0.101856
LRRC20	0.607335	25.4974	3.72795	0.0123259	0.101865
CAND1	-0.40644	30.7789	-3.72625	0.0123486	0.101865
PSMD8	-0.572564	28.4951	-3.72586	0.0123538	0.101865
RPL14	-0.406202	30.5182	-3.72474	0.0123686	0.101865
YAF2	-0.963599	25.913	-3.71953	0.0124382	0.101865
PTBP1	-0.317306	33.3779	-3.71937	0.0124404	0.101865
MRGBP	0.456862	24.9364	3.71843	0.0124531	0.101865
MRPS22	-0.475716	28.0966	-3.71143	0.0125474	0.102385
MGST1	-0.571444	28.2862	-3.70993	0.0125677	0.102385
SARS2	-0.654261	26.5783	-3.70524	0.0126315	0.102695
ZNF687	-0.464131	24.7697	-3.86314	0.0159458	0.112502
MAZ	-0.856419	26.7853	-3.69777	0.0127338	0.103205
DCTD	-0.311863	27.4543	-3.69691	0.0127458	0.103205
GALK2	-0.602403	26.0728	-3.6917	0.0128178	0.103578
TMPPE	0.912527	23.7624	3.68977	0.0128445	0.103584
CCDC6	0.427124	27.8837	3.68276	0.0129424	0.103719
HELLS	-0.390362	27.9785	-3.68267	0.0129437	0.103719
UBE2G2	0.822449	28.2106	3.68115	0.0129649	0.103719
SDCCAG8	0.994964	22.9098	3.66846	0.0131447	0.104617
HSP90AA1	-0.326865	35.9492	-3.66769	0.0131556	0.104617
NPC2	0.361348	27.7972	3.66431	0.013204	0.104794
ATP6V1H	-0.83284	27.5138	-3.6605	0.0132589	0.105021
CYTH1	-0.373098	25.7834	-3.65464	0.0133435	0.105046
FAM192A	0.346596	27.0941	3.65435	0.0133477	0.105046
LSM3	-0.467489	28.8256	-3.6531	0.013366	0.105046
RAB5C	-0.533605	29.9878	-3.64159	0.0135345	0.105945
PPIL4	0.562915	26.5015	3.63545	0.0136255	0.106367
RPL27	-0.352067	31.2654	-3.63141	0.0136856	0.106367
EEFSEC	-0.354483	28.8917	-3.63083	0.0136943	0.106367
MEMO1	-0.329493	28.4512	-3.62968	0.0137115	0.106367
CEBPZ	-0.362137	28.3542	-3.6278	0.0137397	0.106367
RBM4B	-0.634414	24.414	-3.77293	0.0173016	0.114804
JMJD6	0.65801	24.5225	3.62621	0.0137635	0.106367
PYGL	-0.307577	32.5992	-3.62548	0.0137746	0.106367
ZCCHC8	0.406174	27.8224	3.62313	0.01381	0.106435
SACM1L	-0.429637	28.8632	-3.62083	0.0138447	0.106498
NAA50	-0.367925	28.963	-3.61662	0.0139085	0.106626
PSMA4	-0.388389	30.316	-3.61513	0.0139313	0.106626
PDCL	0.686205	25.2647	3.61188	0.0139808	0.106626
RPL22	0.425731	32.2285	3.61154	0.013986	0.106626
SPR	-0.324533	28.1142	-3.60991	0.014011	0.106626
RANGAP1	-0.343202	30.4593	-3.60852	0.0140323	0.106626
BIRC5	0.477903	26.0915	3.60425	0.0140982	0.106805
SMC1A	0.397437	29.0398	3.60187	0.014135	0.106881
LSM7	0.419099	28.5407	3.59922	0.014176	0.106902
ZKSCAN1	0.327165	25.4201	3.59825	0.0141912	0.106902
NOL10	0.445804	28.0399	3.59417	0.0142549	0.106947
THEM6	0.407602	26.1889	3.59273	0.0142774	0.106947
HNRNPH1	0.339507	32.9575	3.58285	0.0144331	0.107713
NOL7	-0.781765	25.6954	-3.58282	0.0144335	0.107713
GOT2	-0.40695	30.9999	-3.57733	0.0145211	0.108001
RFC4	-0.369399	30.0635	-3.56728	0.0146826	0.108112
UTP3	-0.575367	26.8555	-3.5666	0.0146936	0.108112
RPS10	-0.326332	30.1544	-3.56433	0.0147302	0.108112
RNF219	0.501417	23.8988	3.55713	0.0148478	0.108576
PPT1	-0.479799	29.4021	-3.55318	0.0149125	0.108746
FADS2	0.347958	27.8819	3.55135	0.0149428	0.108746
EHMT1	-0.382129	26.7367	-3.55075	0.0149526	0.108746
TRIP13	-0.337991	27.0196	-3.54732	0.0150093	0.108961
UQCRQ	0.705148	26.7083	3.53291	0.0152504	0.109918
TNPO2	0.405208	26.923	3.53286	0.0152512	0.109918
NPTN	-0.885226	26.5279	-3.53013	0.0152975	0.110054
PEX11B	-0.394502	25.4956	-3.65708	0.0192475	0.122043
SLC25A12	-0.353594	26.3612	-3.51996	0.0154707	0.111009
NAP1L4	-0.306891	30.5934	-3.51909	0.0154858	0.111009
RUVBL1	-0.385335	31.4171	-3.50589	0.0157143	0.112266
POLR2C	0.46962	27.3738	3.50572	0.0157172	0.112266
FAU	0.427347	28.4366	3.50342	0.0157575	0.112353
NIT2	-0.337484	29.3802	-3.50115	0.0157972	0.112436
BAG3	0.385804	26.4655	3.49623	0.0158839	0.112502
HIST2H3A	-1.6478	31.9676	-3.49509	0.015904	0.112502
PBDC1	0.395532	28.6578	3.49287	0.0159435	0.112502
MOB4	0.463994	27.2905	3.49199	0.0159591	0.112502
ARHGDIA	0.332446	32.3826	3.48956	0.0160024	0.112502
STAT3	-0.35892	30.2393	-3.48369	0.0161074	0.112502
MRPL53	-0.403708	27.4571	-3.48268	0.0161256	0.112502
PSPH	-0.490667	27.6293	-3.48189	0.0161396	0.112502
ARMT1	-0.638245	25.0591	-3.48036	0.0161673	0.112502
YWHAH	-0.296714	30.7003	-3.47851	0.0162007	0.112502
RBM42	0.46161	27.1446	3.47634	0.0162399	0.112502
TXN2	0.436017	27.125	3.47609	0.0162444	0.112502
SAAL1	-0.354702	26.7212	-3.47549	0.0162553	0.112502
MAPKAPK2	-0.628608	25.1171	-3.47466	0.0162703	0.112502
VEZF1	-0.41424	25.9165	-3.47149	0.016328	0.112502
EMG1	0.361439	28.9479	3.47043	0.0163474	0.112502
GPATCH8	-0.591584	26.5213	-3.46589	0.0164305	0.112502
RAE1	0.32704	29.3438	3.4648	0.0164505	0.112502
PPP1CC	0.392169	28.9749	3.46364	0.0164719	0.112502
CUTC	0.561274	24.8876	3.46337	0.0164769	0.112502
CNPY2	0.486297	29.4675	3.46312	0.0164815	0.112502
FBXO22	0.677161	26.1515	3.58039	0.0206779	0.124607
GMFB	0.535117	27.8745	3.45828	0.016571	0.11292
LZIC	-0.978797	26.9773	-3.45347	0.0166603	0.113335
EIF4A3	-0.306021	32.0991	-3.44707	0.0167801	0.113957
SSR3	-0.46194	25.723	-3.44398	0.0168383	0.114123
CROCC	-0.657904	27.3311	-3.44113	0.0168922	0.114123
ACTG1	0.322042	37.7617	3.44063	0.0169016	0.114123
IFITM3	0.710833	26.7844	3.43861	0.0169401	0.114123
UBE2N	0.47096	30.8173	3.43823	0.0169472	0.114123
TSR1	-0.349523	27.7186	-3.43443	0.0170197	0.114287
STRN4	0.443498	27.423	3.43246	0.0170574	0.114287
FADD	-0.609614	25.7867	-3.42513	0.0171983	0.114804
RBBP6	0.615633	26.9159	3.42363	0.0172274	0.114804
S100A11	-0.438938	30.2311	-3.4225	0.0172492	0.114804
GSPT2	-0.431727	26.9698	-3.42093	0.0172797	0.114804
SRRM1	-0.311196	29.7309	-3.419	0.0173172	0.114804
PIGK	0.471989	27.7229	3.41692	0.0173579	0.114804
TUBG1	-0.312212	28.8897	-3.4166	0.0173641	0.114804
ESD	-0.304666	31.5917	-3.41499	0.0173956	0.114822
XPO7	-0.502759	28.7158	-3.41213	0.0174517	0.114955
SLC25A1	-0.512575	27.6034	-3.40985	0.0174966	0.114955
CWF19L1	0.475965	27.7187	3.40734	0.017546	0.114955
DCP2	0.400252	25.1087	3.40733	0.0175462	0.114955
RDH11	0.538684	28.0062	3.40369	0.0176184	0.114955
ARPC2	-0.305351	29.6206	-3.40151	0.0176617	0.114955
BASP1	-0.346085	29.5531	-3.40088	0.0176743	0.114955
CLTC	-0.304796	33.857	-3.39772	0.0177374	0.115178
CBX3	0.310769	31.9898	3.38852	0.0179225	0.116191
ERAP2	-0.363342	25.6511	-3.38538	0.0179864	0.116377
BCLAF1	-0.294379	30.1559	-3.38424	0.0180094	0.116377
POLR2J	0.427412	26.4073	3.38074	0.0180809	0.116651
PCYOX1L	0.474518	26.5765	3.37194	0.0182619	0.117629
HIGD1A	0.32981	25.8568	3.35927	0.018526	0.119138
HDHD2	-0.648525	26.3152	-3.35477	0.0186208	0.119555
CDK4	0.473209	25.5392	3.35323	0.0186534	0.119573
TMEM167A	-1.59974	25.2326	-3.35046	0.018712	0.119703
HNRNPF	0.286057	32.7788	3.34567	0.0188141	0.119983
LARS2	-0.365493	27.4156	-3.34459	0.0188373	0.119983
HNRNPDL	0.337972	30.8348	3.32882	0.0191783	0.121961
DCAKD	0.483876	25.2739	3.32544	0.0192523	0.122043
ZNF579	-0.591611	25.0471	-3.32336	0.0192981	0.12214
OXSR1	-0.313623	28.5317	-3.32119	0.0193457	0.122163
COTL1	0.37785	31.6985	3.31971	0.0193785	0.122163
CMBL	-0.363818	27.2596	-3.31903	0.0193934	0.122163
GINS2	-0.452864	25.2712	-3.31484	0.0194864	0.122459
CNN2	-0.626347	27.5503	-3.31262	0.0195359	0.122459
COX17	-0.315869	28.8043	-3.31157	0.0195593	0.122459
PRCP	0.399211	26.8713	3.31141	0.0195629	0.122459
GPN3	0.671527	25.6707	3.30715	0.0196583	0.122534
PPA2	0.277277	29.2283	3.30638	0.0196755	0.122534
CD2AP	0.807839	26.4371	3.30543	0.0196969	0.122534
GTF2H2C	0.352529	27.2029	3.30271	0.0197583	0.122534
TXNRD1	-0.351249	29.998	-3.3015	0.0197857	0.122534
PIP4K2B	0.621858	26.0098	3.30134	0.0197892	0.122534
ATAD3B	0.661581	26.8289	3.29498	0.0199337	0.123047
SLC25A10	-0.46097	28.603	-3.29337	0.0199704	0.123084
CNOT1	-0.374167	29.117	-3.2903	0.0200408	0.123328
BROX	0.289479	24.9353	3.28642	0.0201301	0.123448
FLYWCH2	2.36182	24.5211	3.28628	0.0201334	0.123448
MRPS5	-0.363912	26.6722	-3.2841	0.0201837	0.123448
PPP6R3	-0.385062	27.8144	-3.28206	0.0202308	0.123547
KIAA0020	0.609839	26.3194	3.28044	0.0202686	0.123589
DHX9	-0.281366	33.0141	-3.26751	0.0205716	0.124607
GORASP2	-0.382557	27.8527	-3.26362	0.0206636	0.124607
SUPT6H	0.284461	28.5337	3.26273	0.0206848	0.124607
ITPR1	0.648315	25.8692	3.25823	0.0207922	0.124939
TLN1	-0.286323	32.2042	-3.25754	0.0208086	0.124939
SAMHD1	-0.948064	26.3218	-3.2565	0.0208336	0.124939
DHX15	-0.320365	31.2358	-3.25047	0.0209786	0.125135
BPTF	-0.567708	26.3439	-3.24899	0.0210144	0.125135
TIMM13	-0.468416	28.7425	-3.24865	0.0210227	0.125135
PTPN18	-0.85534	23.7852	-3.33145	0.0262613	0.135542
WBSCR16	0.317085	26.7465	3.24482	0.0211155	0.12526
SRP72	-0.278977	30.2074	-3.24395	0.0211367	0.12526
FTO	-0.338052	27.4605	-3.24392	0.0211376	0.12526
PDHX	0.758216	26.7219	3.23973	0.0212399	0.125387
BTF3L4	0.546497	29.2554	3.23864	0.0212665	0.125387
UBE2L6	-0.477353	26.6962	-3.23651	0.0213188	0.125387
DCP1A	0.420523	26.7259	3.23375	0.0213868	0.125387
CPSF6	-0.318977	30.6519	-3.23268	0.0214134	0.125387
SAR1B	-0.425976	27.6065	-3.23107	0.0214531	0.125387
F8A1	-0.977769	24.0076	-3.23103	0.0214541	0.125387
GSTO1	-0.429533	28.301	-3.23072	0.0214617	0.125387
SUMO2	0.326718	31.3212	3.23012	0.0214766	0.125387
RAB1B	0.305758	31.6447	3.22902	0.0215039	0.125387
MBD3	-0.334383	28.5785	-3.223	0.0216539	0.126078
RPL18	-0.350874	31.8691	-3.22124	0.0216982	0.126152
COX15	-0.662965	25.0375	-3.21555	0.0218412	0.126437
RPRD1A	-0.687684	25.2223	-3.21552	0.0218421	0.126437
SCYL2	-0.418212	26.6653	-3.21242	0.0219206	0.126708
RPS8	0.34484	32.3481	3.20432	0.0221271	0.127213
NECAP2	-0.482263	26.9671	-3.20269	0.022169	0.127213
RPS11	-0.295846	31.7576	-3.20171	0.0221941	0.127213
ROMO1	0.698537	26.6216	3.20084	0.0222166	0.127213
SRI	-0.356708	29.7142	-3.19944	0.0222526	0.127213
PFDN2	-0.315228	29.4671	-3.19926	0.0222572	0.127213
PRRC2A	0.406206	28.4026	3.19754	0.0223017	0.127213
METAP1	-0.388665	30.0206	-3.19581	0.0223466	0.127213
PRKDC	-0.285916	33.5065	-3.19363	0.022403	0.127213
NME2	-0.359734	33.913	-3.19345	0.0224079	0.127213
NUDCD1	0.384911	27.8902	3.19158	0.0224564	0.127213
UFC1	-0.433516	27.0933	-3.19145	0.0224599	0.127213
YKT6	-0.564567	25.8423	-3.1902	0.0224926	0.127213
EEF1E1	-0.34756	29.2785	-3.18926	0.022517	0.127213
MDN1	-0.404676	27.962	-3.18892	0.0225259	0.127213
SCAMP2	0.369541	26.9901	3.18806	0.0225485	0.127213
NISCH	0.588092	27.3288	3.18667	0.0225849	0.127239
HP1BP3	-0.295976	30.2271	-3.18068	0.0227426	0.127947
ALDH9A1	-0.298767	29.8574	-3.17689	0.0228429	0.128331
NOB1	-0.369226	26.1975	-3.17252	0.0229595	0.128805
VPS35	-0.315369	29.3575	-3.16576	0.0231409	0.129641
CNIH4	-0.611179	27.2464	-3.16376	0.0231947	0.129761
NUDC	-0.265254	31.7683	-3.16174	0.0232494	0.129885
CNPY3	0.30947	27.6615	3.1587	0.0233318	0.130071
XPNPEP3	0.52987	25.5697	3.15765	0.0233605	0.130071
YARS2	0.414897	27.161	3.15693	0.0233802	0.130071
AKR1A1	-0.401083	29.6915	-3.15449	0.0234469	0.130261
RAB3GAP1	0.405882	27.1698	3.14983	0.0235746	0.130419
TCOF1	-0.271662	29.7282	-3.14982	0.0235748	0.130419
RPS5	-0.3134	32.1466	-3.14817	0.0236203	0.130419
EBP	-0.436796	29.3067	-3.14752	0.0236384	0.130419
ETF1	-0.278819	30.266	-3.14548	0.0236946	0.130548
MAT2B	-0.320848	29.3993	-3.14051	0.0238326	0.130948
PPP6C	0.307771	28.8682	3.13739	0.0239197	0.131099
CSRP1	-0.363205	29.3873	-3.13671	0.0239386	0.131099
CHAMP1	0.398695	27.6113	3.13601	0.0239584	0.131099
ANKRD22	0.595043	24.282	3.13327	0.0240353	0.13119
B3GAT3	0.473275	25.5617	3.13308	0.0240405	0.13119
LCLAT1	-0.826928	26.194	-3.13012	0.024124	0.131466
ATP5J2	-0.764568	27.7909	-3.12868	0.0241647	0.131509
ETFA	-0.267303	30.7359	-3.12633	0.0242312	0.131556
FLNA	0.266685	29.2215	3.12505	0.0242675	0.131556
ANAPC7	-0.459361	27.8511	-3.12489	0.0242721	0.131556
HNRNPA2B1	0.316717	34.484	3.12197	0.0243551	0.131807
PLCG1	0.296314	28.4962	3.12095	0.0243843	0.131807
GNAQ	-0.383968	27.4909	-3.11957	0.0244237	0.131842
PRKCB	0.353934	28.6386	3.11637	0.0245156	0.131883
LARP7	-0.432933	26.9373	-3.11586	0.0245303	0.131883
PHF3	0.637186	25.9244	3.18274	0.030435	0.145463
RAD23A	-0.375703	27.28	-3.11052	0.0246844	0.132533
MLLT1	0.626865	25.6535	3.1777	0.0305895	0.145664
CCDC86	-0.322926	27.2346	-3.10921	0.0247225	0.13256
RPS6	0.267819	31.3708	3.10716	0.0247819	0.132587
IDH1	-0.305109	29.7347	-3.10675	0.0247937	0.132587
FGD3	0.402598	26.1315	3.10199	0.0249329	0.132853
ARSB	0.618489	25.3603	3.10198	0.024933	0.132853
DLG1	0.369385	26.534	3.10164	0.0249432	0.132853
NDUFA12	0.32354	26.2077	3.10022	0.0249846	0.132897
TTC27	0.268789	25.9737	3.09777	0.0250568	0.133094
BAG4	0.61099	26.3188	3.0967	0.0250882	0.133094
POGK	-0.321118	24.8832	-3.16094	0.0311097	0.146917
CASP6	-0.452935	27.8061	-3.09491	0.0251411	0.133198
RPL38	-0.280959	29.905	-3.09159	0.0252393	0.133541
SPCS1	-0.414967	27.5018	-3.088	0.0253463	0.13393
MAGT1	0.741695	26.0621	3.15146	0.0314085	0.147631
FLI1	0.693031	26.9428	3.08641	0.0253938	0.134004
NT5DC1	0.379215	23.9407	3.08517	0.0254308	0.13402
RPS27A	-0.292725	33.4113	-3.08407	0.0254638	0.13402
STMN1	0.312024	33.272	3.08214	0.0255217	0.134148
NIPSNAP1	-0.324092	30.3313	-3.07633	0.0256971	0.134678
PTPN2	0.411614	26.0648	3.07166	0.0258388	0.134772
RPA1	-0.310745	30.3775	-3.07078	0.0258657	0.134772
PSIP1	-0.287972	29.5468	-3.07043	0.0258763	0.134772
COPS7B	0.361694	26.1968	3.06466	0.0260531	0.135202
PRPSAP1	-0.385719	28.1689	-3.06443	0.0260602	0.135202
ARF1	-0.393909	31.3834	-3.06302	0.0261037	0.135252
RNF20	0.393097	27.2134	3.05977	0.0262041	0.135421
UBE2V1	0.507515	29.3547	3.05539	0.0263399	0.135772
IRF2BP2	0.272862	29.0802	3.05181	0.0264517	0.136173
PPFIA1	-1.04236	26.702	-3.04734	0.026592	0.13653
RPL19	-0.405647	30.5455	-3.04577	0.0266413	0.13653
MRPL12	-0.361366	28.0373	-3.04575	0.0266421	0.13653
FN3KRP	0.708121	26.4548	3.04526	0.0266574	0.13653
RFC5	-0.46156	28.3074	-3.04295	0.0267305	0.136729
CDC42SE2	0.437736	27.5586	3.03999	0.0268243	0.136859
RHOXF2	-1.58856	26.0723	-3.03785	0.0268922	0.13703
APP	-0.347838	27.2423	-3.02974	0.0271521	0.137925
UTP20	-0.670272	26.4203	-3.0294	0.0271632	0.137925
IDI1	-0.327167	28.4087	-3.02915	0.0271712	0.137925
FAM129A	-0.359971	28.2532	-3.02803	0.027207	0.137932
RBBP5	0.571572	26.046	3.02183	0.0274082	0.138653
HACD3	-0.353194	30.4772	-3.02076	0.0274428	0.138653
PEX19	0.381946	26.4567	3.02	0.0274675	0.138653
SGPL1	0.479889	25.7815	3.01469	0.0276415	0.138653
PRPF38A	0.596224	26.6145	3.01212	0.027726	0.138653
SMPD4	-0.413768	24.9472	-3.01204	0.0277285	0.138653
ACBD3	-0.348372	26.3569	-3.01093	0.0277653	0.138653
SESN2	0.291868	23.6536	3.01082	0.0277689	0.138653
DIABLO	0.530746	28.8697	3.0101	0.0277926	0.138653
TRA2A	0.53196	27.4675	3.00981	0.0278023	0.138653
NR3C1	-0.365281	27.9649	-3.00967	0.0278069	0.138653
HMGN4	-0.357589	26.4343	-3.00826	0.0278536	0.138653
PDIA5	-0.454547	27.4579	-3.00779	0.0278692	0.138653
UQCC2	-0.271959	25.654	-2.99866	0.0281735	0.139819
TAB1	-0.590004	26.1151	-3.04388	0.035043	0.158551
WDR48	0.630953	26.4181	2.99098	0.0284324	0.140391
TCEB1	-0.384128	29.1656	-2.99015	0.0284604	0.140391
VCL	-0.251674	30.5761	-2.99004	0.0284643	0.140391
PRKACB	-0.614794	27.4534	-2.98659	0.0285815	0.140795
DPP3	0.405362	29.0747	2.98398	0.0286706	0.141061
HSPA2	0.669576	26.2062	2.98085	0.028778	0.141415
RPL7	-0.257687	31.827	-2.97644	0.0289299	0.141987
ALCAM	0.43401	28.0685	2.97514	0.0289749	0.142034
CEP41	-0.486787	25.6936	-2.97173	0.0290931	0.142438
COPB1	-0.285473	30.7015	-2.96843	0.0292079	0.142826
PAFAH1B2	-0.473864	29.229	-2.96486	0.0293328	0.143137
PPID	-0.291875	29.4214	-2.96301	0.0293979	0.143137
DDX31	0.540368	26.5007	2.96274	0.0294072	0.143137
GTF3C2	0.457624	28.0942	2.96253	0.0294146	0.143137
TP53RK	-0.473173	26.8813	-2.96071	0.0294788	0.143275
URB1	0.721228	26.867	2.95787	0.0295792	0.143428
ATP5J	0.283758	29.0559	2.95648	0.0296283	0.143428
PFDN6	0.248146	28.2558	2.9561	0.0296419	0.143428
PTCD3	0.430497	27.212	2.95577	0.0296537	0.143428
APEX1	-0.260564	31.4218	-2.9545	0.0296986	0.143472
ATIC	0.256758	30.6316	2.94749	0.029949	0.144317
RPN2	-0.285738	32.283	-2.94725	0.0299577	0.144317
DNA2	0.477609	23.9842	2.94428	0.0300645	0.144541
MED29	0.455037	24.8455	2.98728	0.0371494	0.162579
TMED5	-0.540798	27.4423	-2.93939	0.0302416	0.145043
HAUS3	-1.30859	23.4318	-2.98056	0.0374088	0.163289
GPX1	-0.257468	30.2993	-2.9355	0.0303829	0.145463
PTRHD1	-0.523257	27.642	-2.93299	0.0304744	0.145463
ZNF207	-0.483316	28.6918	-2.93061	0.0305618	0.145664
ANPEP	-0.298719	31.2977	-2.92739	0.0306802	0.145776
DARS	-0.258713	31.4419	-2.92724	0.0306858	0.145776
GALNT2	0.274937	29.7502	2.92393	0.0308081	0.146183
RBM22	0.380122	28.5856	2.92185	0.0308853	0.146376
MRPS9	0.391101	26.4201	2.92016	0.030948	0.146499
AP1M1	-0.348657	28.2226	-2.91325	0.0312064	0.147049
MBOAT7	-0.376148	27.4007	-2.91312	0.0312111	0.147049
LSM2	-0.443946	29.2895	-2.90956	0.0313453	0.147507
PRDX3	-0.416272	32.1838	-2.89711	0.031819	0.149385
TOMM7	-0.568538	27.1673	-2.89518	0.031893	0.149557
ZBTB11	-0.484454	23.5017	-2.89194	0.0320182	0.149968
BCCIP	-0.346782	28.8382	-2.88896	0.0321336	0.150333
DLAT	-0.303853	29.2	-2.8878	0.0321784	0.150367
MANBA	0.564183	24.5607	2.92358	0.0396967	0.166706
ARPC4	0.3178	29.578	2.88262	0.0323804	0.151093
TMSB15B	0.359908	29.0802	2.88092	0.0324471	0.151093
CDK2	0.368875	28.0276	2.87831	0.0325495	0.151328
GOLIM4	-0.357003	24.8017	-2.87771	0.0325733	0.151328
MRPL4	-0.790301	27.5106	-2.87462	0.0326952	0.151517
RUFY1	0.315095	28.2882	2.8739	0.0327237	0.151517
FUBP3	-0.290171	29.9895	-2.87325	0.0327491	0.151517
SLC7A5	-0.296619	28.3756	-2.87284	0.0327656	0.151517
NOL11	-0.328796	28.3433	-2.86976	0.032888	0.151908
PIH1D1	-0.345009	27.028	-2.86719	0.0329902	0.152204
DGKZ	-0.259033	29.3433	-2.86334	0.0331447	0.15274
GOSR2	0.451022	23.3732	2.89056	0.0410957	0.168981
VPS45	-0.439955	25.4177	-2.85308	0.0335589	0.154471
ELAVL1	-0.28292	31.2804	-2.85189	0.0336076	0.154517
ATP6V1G1	0.283629	27.4753	2.85036	0.03367	0.154519
ARL6IP1	-0.968893	26.3768	-2.84934	0.0337118	0.154519
RTN3	0.518856	27.1558	2.84815	0.0337606	0.154519
COPS4	-0.266838	28.6192	-2.83975	0.0341062	0.155914
CSTF1	-0.283131	29.0165	-2.83133	0.0344573	0.157339
HVCN1	-0.35008	26.2453	-2.82997	0.034514	0.157419
PDCD11	0.258379	27.9823	2.82877	0.0345646	0.15747
POLR2A	0.323803	29.155	2.82514	0.0347175	0.157817
POLE	0.717028	25.5067	2.82455	0.0347426	0.157817
USP15	0.346184	28.7792	2.82415	0.0347592	0.157817
CDC73	-0.462302	27.1833	-2.82204	0.0348486	0.158043
CORO1A	0.277408	32.2431	2.81937	0.0349623	0.15838
ASMTL	-0.548223	26.3091	-2.84741	0.0430104	0.172476
U2AF1	0.306275	30.9736	2.81607	0.0351028	0.158551
NTHL1	0.338469	26.779	2.81569	0.0351191	0.158551
FNTA	0.431279	26.3144	2.81302	0.0352336	0.158889
TOP2B	-0.272175	30.9935	-2.80925	0.0353959	0.159434
NUP37	0.286959	28.2888	2.80781	0.0354582	0.159434
AK6	-0.270565	28.5024	-2.80496	0.0355815	0.159737
SNRPG	0.257485	29.9146	2.80162	0.0357266	0.160107
LYPLA2	-0.252942	28.9919	-2.801	0.0357536	0.160107
UBN1	0.450753	27.5177	2.79941	0.0358233	0.160107
GANAB	-0.29342	32.943	-2.79939	0.035824	0.160107
CCDC43	-0.508237	24.9353	-2.79847	0.0358642	0.160108
ENY2	-0.503341	26.7648	-2.79464	0.0360326	0.160376
CASP8	0.373153	27.567	2.79268	0.0361189	0.160376
ACTN4	-0.250524	32.4387	-2.79255	0.0361246	0.160376
APPL1	0.340124	27.213	2.78845	0.0363061	0.160824
SEPT2	0.285864	30.68	2.78685	0.0363769	0.16096
USP8	0.408795	24.9897	2.78336	0.0365325	0.16147
CSE1L	-0.233127	32.2909	-2.78127	0.0366263	0.161677
STK39	0.59162	26.4844	2.78051	0.0366602	0.161677
ARHGEF7	-0.45911	26.105	-2.77775	0.0367839	0.161993
EIF2AK2	0.361432	28.0093	2.77533	0.0368931	0.161993
MACROD1	-0.24739	28.8866	-2.77456	0.0369282	0.161993
SPCS3	-0.412687	27.1398	-2.77306	0.0369959	0.162085
VPS4B	0.288904	28.0666	2.76831	0.0372117	0.162674
POLR2K	-0.489173	24.999	-2.78948	0.0457439	0.177259
DYNC1LI2	-0.286177	27.3177	-2.76149	0.0375238	0.163289
SMARCA4	0.2926	28.1909	2.76132	0.0375316	0.163289
CARM1	-0.28413	27.54	-2.76129	0.0375331	0.163289
PSMB4	0.290013	29.321	2.7599	0.0375973	0.163289
PRIM2	0.415067	25.5996	2.75837	0.0376677	0.163417
AGTRAP	0.48384	26.7644	2.75603	0.037776	0.16371
TMEM126A	-0.969724	25.7229	-2.75423	0.0378596	0.163894
NAA10	0.259168	29.5029	2.75095	0.0380123	0.164149
CPNE3	0.35612	25.7032	2.74998	0.0380577	0.164149
MLF2	0.417931	27.0331	2.74944	0.0380826	0.164149
NUP188	0.344137	27.0519	2.74763	0.0381674	0.164338
SF3B1	-0.231673	32.1559	-2.74599	0.0382446	0.164493
DCTN3	0.333668	25.9854	2.74219	0.0384233	0.164877
SORD	-0.376348	30.1986	-2.74067	0.0384951	0.164877
CDC27	-0.298334	26.5233	-2.73866	0.0385906	0.164877
FABP5	0.230791	31.7696	2.73864	0.0385916	0.164877
LAMP1	0.613868	27.7565	2.73812	0.0386159	0.164877
MRPL45	0.426312	27.6113	2.73799	0.0386225	0.164877
MIF4GD	-0.299152	26.834	-2.73531	0.0387497	0.164953
PDCD6	-0.417832	28.265	-2.73501	0.0387639	0.164953
GDI2	-0.22972	33.0553	-2.73258	0.03888	0.165271
SCD	0.269268	26.3568	2.72905	0.0390495	0.165581
RPL17	-0.258827	30.7572	-2.72847	0.039077	0.165581
SERF2	0.303038	27.4748	2.72763	0.0391178	0.165581
NENF	0.464431	28.2136	2.7269	0.039153	0.165581
TIMM8B	1.04617	26.576	2.72675	0.0391598	0.165581
CCDC137	-0.614392	25.831	-2.74367	0.0480464	0.181039
ARPP19	0.383455	27.3206	2.72082	0.039447	0.166443
ERG	0.325212	27.0128	2.71924	0.0395239	0.166592
GLG1	0.246567	30.0586	2.71734	0.0396163	0.16663
ZMPSTE24	-0.240154	28.2115	-2.71495	0.0397332	0.166706
EZH2	0.275019	27.1666	2.71442	0.0397595	0.166706
ANAPC10	-0.292389	25.0024	-2.73204	0.0486516	0.182387
MGST2	-0.533347	27.0339	-2.71165	0.0398954	0.167101
ACO1	-0.266465	28.734	-2.70922	0.0400149	0.167426
SNX12	0.360873	27.6676	2.70732	0.040109	0.167645
NLE1	0.383276	28.3661	2.70304	0.0403212	0.16813
GLS	-0.294371	28.024	-2.7018	0.0403832	0.16813
UBL4A	0.261538	26.6279	2.70159	0.0403933	0.16813
TIMM10	1.43353	25.344	2.71842	0.0493717	0.183616
RNASEH1	0.277526	23.4425	2.69796	0.0405748	0.16871
NOC4L	-0.545408	27.9425	-2.69519	0.040714	0.168766
H2AFX	0.394505	34.5026	2.69517	0.0407149	0.168766
SORBS3	1.53395	26.9315	2.69275	0.0408372	0.168923
NSUN5	0.272078	27.2275	2.69079	0.0409361	0.168981
RPL12	0.225661	32.0061	2.68878	0.041038	0.168981
SNRPA	-0.251696	30.5832	-2.68854	0.0410499	0.168981
SLAIN2	-0.514464	23.876	-2.68841	0.0410567	0.168981
RBM25	-0.244068	29.7751	-2.6874	0.0411082	0.168981
SNW1	0.248942	29.9854	2.686	0.041179	0.168981
FRG1	-0.332942	28.4781	-2.68581	0.0411891	0.168981
EHD1	-0.481223	28.133	-2.67633	0.0416748	0.170581
RAB21	0.392547	27.9215	2.67594	0.0416948	0.170581
EIF2B1	0.319664	27.7751	2.67571	0.041707	0.170581
ZSCAN12	-0.467507	25.9886	-2.67472	0.041758	0.170615
SRP54	-0.275108	28.7786	-2.67161	0.0419191	0.17082
GLRX5	-0.354741	28.3559	-2.67128	0.0419362	0.17082
EIF4A1	-0.240555	32.6879	-2.66818	0.0420979	0.171214
BET1	0.282536	24.2845	2.67864	0.0515454	0.18795
UPF2	0.394404	26.0512	2.66394	0.0423193	0.171681
COL4A3BP	0.53872	24.9521	2.6629	0.0423741	0.171729
CBX5	-0.238708	29.6317	-2.6556	0.0427595	0.172476
CUL3	-0.589259	25.7103	-2.65466	0.0428093	0.172476
THOC3	-0.32195	29.0217	-2.65153	0.0429758	0.172476
BZW1	-0.295609	29.5654	-2.64931	0.0430945	0.172476
TTC4	0.570585	27.3494	2.64927	0.0430968	0.172476
RIF1	-0.234097	28.0368	-2.64785	0.0431726	0.172476
SUPT5H	-0.249678	29.3917	-2.64725	0.0432051	0.172476
SCFD2	-0.288242	26.2811	-2.64335	0.0434149	0.17314
DBNL	0.249094	28.4826	2.63681	0.0437694	0.173905
POLA1	-0.624247	26.4854	-2.6366	0.0437805	0.173905
SERPINB9	-0.383682	27.9147	-2.63389	0.0439282	0.174318
USP39	-0.273376	28.7594	-2.63189	0.044038	0.174581
GPX7	-0.602091	28.1805	-2.63004	0.0441396	0.174679
PTPN1	-0.288882	28.4678	-2.62985	0.04415	0.174679
PRDX6	-0.256006	33.0943	-2.62752	0.0442779	0.174839
SNRPN	-0.279202	30.3599	-2.62559	0.0443847	0.175088
PVR	-0.656458	22.2848	-2.61685	0.0448703	0.176574
NELFA	0.490091	27.34	2.61629	0.0449017	0.176574
ZNF740	1.09007	25.095	2.61486	0.044982	0.176574
GTF2F2	-0.323902	28.6805	-2.61407	0.0450264	0.176574
LEO1	-0.810144	26.2734	-2.61184	0.0451514	0.176842
P4HA1	0.282434	29.417	2.61128	0.045183	0.176842
NOP9	-0.68009	25.2144	-2.60977	0.0452679	0.176956
ZMYM3	0.222213	28.0037	2.60919	0.0453008	0.176956
AP3B1	0.269608	29.1378	2.60724	0.0454113	0.177215
ATP6V1D	0.282646	26.4878	2.60551	0.0455096	0.177259
SH3BGRL3	-0.337293	28.7519	-2.60483	0.0455479	0.177259
SYF2	0.3719	27.1494	2.60409	0.0455901	0.177259
IDH3G	-0.316607	27.4563	-2.60142	0.0457426	0.177259
EIF4G2	0.28108	30.0087	2.60023	0.0458105	0.177259
DLD	-0.376959	29.574	-2.5987	0.0458982	0.177259
PLAA	0.548285	26.1641	2.59804	0.0459359	0.177259
GGCT	-0.442129	27.5063	-2.59722	0.0459829	0.177259
CCDC124	0.271057	28.167	2.59694	0.0459986	0.177259
GMPPB	0.413896	25.2277	2.59755	0.0563215	0.19884
NLN	0.430425	27.2722	2.59099	0.0463423	0.17824
KIAA1033	0.23915	26.2523	2.59018	0.046389	0.178248
HNRNPA1	0.249372	34.4787	2.58657	0.046599	0.178575
COMMD3	-0.420568	26.4933	-2.58474	0.0467058	0.178575
LUC7L	0.294789	27.3781	2.58406	0.0467452	0.178575
ZC3H4	-0.258966	28.4648	-2.58371	0.0467659	0.178575
COIL	-0.363344	27.1287	-2.58335	0.0467868	0.178575
HYPK	-0.234648	27.7163	-2.58079	0.0469368	0.178977
PWP1	-0.580737	27.2706	-2.57868	0.0470609	0.179279
UGP2	0.24318	29.7973	2.57386	0.0473456	0.179723
HEATR1	-0.295549	28.4763	-2.57291	0.047402	0.179723
NDUFAF2	-0.233489	28.5758	-2.57025	0.04756	0.179981
SERBP1	-0.244412	32.8585	-2.56909	0.0476294	0.180073
DNAJC21	-0.584704	24.5658	-2.56781	0.0477059	0.180192
VPS26A	0.350982	28.5923	2.56343	0.0479682	0.181012
RPL4	-0.228556	32.5012	-2.56181	0.0480658	0.181039
GABPA	0.355382	27.3446	2.55961	0.0481983	0.181242
TARS	0.21722	30.8635	2.55368	0.0485581	0.182378
NT5C2	-0.313317	27.2566	-2.55251	0.0486296	0.182387
RPL24	0.213843	30.3971	2.55085	0.0487311	0.182514
EXOSC2	-0.234138	28.5973	-2.54989	0.0487899	0.182563
DACH1	3.37978	26.1882	2.54994	0.0593583	0.204507
MSH6	-0.271706	30.4125	-2.5462	0.0490165	0.183239
NUDT5	-0.24467	29.1849	-2.54539	0.0490661	0.183253
DDX46	-0.219027	30.0584	-2.54426	0.0491358	0.183343
CS	-0.304496	31.5527	-2.54119	0.0493259	0.183616
TBL3	0.301368	28.8328	2.54114	0.049329	0.183616
ADNP	0.230326	29.1989	2.54011	0.0493928	0.183616
CIAO1	0.37792	27.4113	2.53863	0.0494847	0.183787
ANKHD1	0.222052	27.9219	2.53638	0.0496249	0.184137
SNAP29	0.764514	25.9235	2.53418	0.0497623	0.184322
CDK1	-0.234982	31.0823	-2.5341	0.0497669	0.184322
PRPS1	-0.325871	27.7726	-2.53316	0.0498261	0.184371
VPS13C	0.348351	25.9545	2.53122	0.049948	0.184616
PRKRA	-0.323129	28.5486	-2.52997	0.0500261	0.184616
DNAJB6	-0.310046	27.737	-2.5299	0.0500309	0.184616
NCL	0.212129	33.1765	2.52293	0.0504715	0.18601
SRSF2	0.261479	30.7446	2.52169	0.0505505	0.186018
CFDP1	-0.242831	27.2895	-2.52089	0.0506013	0.186034
ATP5F1	-0.414179	29.8425	-2.51949	0.0506905	0.186191
CHRAC1	1.00771	26.2176	2.51797	0.0507876	0.186235
CHCHD2	0.442532	29.525	2.51784	0.0507957	0.186235
NXF1	0.243863	28.2199	2.51641	0.0508871	0.186241
EIF4EBP2	0.2936	27.3669	2.51636	0.0508903	0.186241
SZRD1	0.323964	26.6319	2.51372	0.0510599	0.18652
OTUB1	-0.22394	29.6506	-2.51038	0.0512755	0.187137
POLR2M	0.492575	24.7137	2.50627	0.0623064	0.211074
HIST1H4A	0.267439	36.3317	2.50464	0.0516477	0.188152
HMOX2	-0.218574	29.3506	-2.49394	0.0523499	0.190363
MED8	0.849657	25.2327	2.49238	0.0524529	0.190491
CENPB	-0.3477	23.9474	-2.48969	0.0526313	0.190491
RBL1	0.343978	27.2707	2.48967	0.0526325	0.190491
HMGN1	-0.358469	30.8016	-2.48937	0.0526526	0.190491
ZC3H6	0.440288	28.0936	2.48934	0.0526546	0.190491
AHNAK	0.603529	26.9334	2.4891	0.0526707	0.190491
RAB44	-0.235936	29.2467	-2.48655	0.0528403	0.19074
RABGGTA	0.534477	26.3306	2.48592	0.0528826	0.19074
MAD1L1	0.797692	26.4903	2.48399	0.0530118	0.191033
PAFAH1B1	0.301166	28.688	2.48262	0.0531034	0.191173
UBASH3B	0.407374	27.5473	2.48195	0.0531485	0.191173
AKT2	0.323651	25.8647	2.48067	0.0532344	0.191173
KLHDC4	-0.722191	24.3479	-2.48056	0.0532416	0.191173
XPOT	-0.279334	27.5759	-2.47432	0.0536634	0.192514
PRPF3	0.310853	28.5667	2.47302	0.0537518	0.192565
LTN1	-0.373798	25.3179	-2.46735	0.065074	0.215654
THRAP3	-0.268116	30.3061	-2.4727	0.0537739	0.192565
SNX5	0.298096	29.0344	2.46997	0.0539599	0.193059
CUX1	0.715518	26.2551	2.46902	0.0540244	0.193117
C1QTNF4	-0.304499	29.0526	-2.46786	0.0541042	0.193229
ACOX1	0.399501	27.8402	2.46643	0.0542017	0.193261
ECM29	-0.214669	27.972	-2.46614	0.054222	0.193261
DENND3	0.330681	27.526	2.46491	0.0543063	0.193261
SPC24	0.31901	28.393	2.45465	0.0550166	0.195402
FNBP1	-0.467241	25.8838	-2.45385	0.0550726	0.195402
MVD	0.25763	28.1219	2.45356	0.0550924	0.195402
MSI2	0.618384	27.1365	2.45341	0.0551034	0.195402
UBQLN2	-0.38175	27.8183	-2.44934	0.0553879	0.196237
TMEM161A	0.457951	25.7133	2.44658	0.0555827	0.196753
KLHL6	0.862611	25.0659	2.43831	0.067229	0.219242
TCF12	-0.296242	27.1595	-2.44523	0.0556778	0.196915
GGA2	-0.374671	26.7233	-2.43831	0.0561685	0.198475
ANXA2	0.239574	31.6288	2.43536	0.0563789	0.198868
SEC24C	-0.298339	29.0462	-2.43311	0.0565404	0.199261
HDGF	0.225893	31.3685	2.42957	0.0567953	0.199984
BAK1	-0.516503	24.9336	-2.41892	0.0687115	0.221471
MRPL50	0.344727	25.3893	2.42521	0.0571107	0.200915
MPI	-0.331419	27.0234	-2.42387	0.0572082	0.200915
TTC9C	0.674873	25.7229	2.42384	0.0572105	0.200915
ALKBH5	-0.315909	26.1602	-2.4117	0.069273	0.222347
HSPA6	0.449277	31.6883	2.42082	0.0574303	0.20151
DNMT3A	0.379637	26.2003	2.41793	0.057642	0.202075
HIGD2A	-0.450493	27.9012	-2.41418	0.0579173	0.202546
EIF1	0.252451	31.1798	2.41218	0.0580646	0.202846
PPP1R2	-0.274543	27.9208	-2.41033	0.0582018	0.202984
MAGED2	0.223562	27.5527	2.41028	0.0582056	0.202984
MRPS14	-0.479239	24.1644	-2.40874	0.0583192	0.203203
PIP4K2C	0.420018	22.2611	2.40552	0.0585588	0.203599
EXOC1	0.281476	26.1342	2.4049	0.0586049	0.203599
ZNF638	0.215212	27.7623	2.40463	0.058625	0.203599
RDX	-0.25209	27.2074	-2.40344	0.0587141	0.203599
RPL31	0.256991	31.0918	2.40258	0.0587786	0.203599
SMU1	0.231534	29.7156	2.40244	0.0587893	0.203599
GCSH	-0.359261	26.7094	-2.40066	0.0589227	0.203805
RAB11B	-0.306117	30.2199	-2.40028	0.0589507	0.203805
MCM5	-0.235761	32.1095	-2.39926	0.0590279	0.203896
CD59	0.309579	25.889	2.39761	0.0591521	0.204149
MOB1A	-0.360615	28.1565	-2.39569	0.0592969	0.204472
PIK3R4	0.432387	25.5827	2.39179	0.0595923	0.205137
CHMP2A	-0.222102	26.5549	-2.3899	0.0597362	0.205455
HSPA1B	-0.202348	32.523	-2.38666	0.0599832	0.205824
SYPL1	-0.690185	28.0836	-2.38592	0.0600395	0.205824
CSNK2A2	-0.431229	28.0633	-2.38572	0.060055	0.205824
ALYREF	-0.232132	32.0184	-2.38546	0.060075	0.205824
C1orf123	0.285852	28.2787	2.38449	0.0601496	0.205824
RFC1	-0.232459	28.3403	-2.38445	0.0601521	0.205824
CANX	-0.278318	32.2606	-2.37985	0.0605063	0.206859
PPIL3	-0.370994	27.097	-2.37754	0.0606851	0.207293
NOC3L	-0.417241	28.2529	-2.37004	0.061269	0.209109
ASNA1	0.283099	29.1831	2.36725	0.0614878	0.209677
NUDCD3	0.468684	27.6292	2.36249	0.0618628	0.21049
SCAMP3	0.416505	28.4436	2.36222	0.0618839	0.21049
YTHDF2	0.264659	29.728	2.36027	0.0620385	0.210836
C4orf27	0.296466	26.1582	2.35893	0.0621444	0.210856
ERP29	-0.219486	30.8335	-2.35887	0.0621498	0.210856
SCCPDH	-0.319836	29.9373	-2.35673	0.0623196	0.211074
ATP6V1A	-0.214433	30.3326	-2.35541	0.0624253	0.211253
MYADM	0.539631	26.9787	2.35326	0.062597	0.211421
ABCB10	-0.502341	25.0521	-2.35048	0.0628196	0.211871
SRPR	-0.20618	29.1521	-2.34818	0.0630052	0.212317
SH3PXD2B	0.237428	26.6211	2.3464	0.0631488	0.212622
QKI	0.297064	26.207	2.34554	0.0632183	0.212677
GHITM	0.550308	24.4576	2.34391	0.0633504	0.212863
FAF1	0.235587	28.0149	2.34289	0.0634331	0.212863
NEDD8	-0.219757	29.076	-2.34074	0.0636082	0.213093
DAZAP1	0.311451	30.1159	2.33975	0.0636883	0.213183
EIF3I	0.215993	31.1495	2.33578	0.0640134	0.214092
ABCE1	-0.20404	31.7629	-2.33511	0.0640682	0.214096
PRMT5	-0.257998	29.6767	-2.33339	0.0642097	0.21439
HAX1	0.277745	26.4477	2.33058	0.0644409	0.214982
NACA	-0.3672	30.8054	-2.32604	0.0648174	0.215654
GSR	0.238397	28.6949	2.32536	0.0648738	0.215654
YWHAQ	0.210592	31.689	2.32524	0.0648833	0.215654
TERF2IP	0.259812	28.5619	2.32305	0.0650659	0.215654
ERCC6L	0.751283	25.2664	2.32301	0.0650696	0.215654
ZNF326	0.248921	28.8849	2.32279	0.0650877	0.215654
SEP15	0.31993	26.8381	2.32221	0.0651362	0.215654
CLGN	-0.312227	28.4801	-2.32167	0.0651814	0.215654
CMAS	0.323877	25.9242	2.31866	0.0654337	0.216014
MRPL48	0.95466	26.5147	2.31856	0.0654415	0.216014
TUBB	0.244779	34.1494	2.31843	0.0654524	0.216014
TOE1	0.298059	25.8614	2.31594	0.0656623	0.216528
GNPAT	0.559955	25.9107	2.31428	0.0658022	0.21655
SNX9	-0.562223	25.111	-2.3141	0.0658175	0.21655
EML3	0.295398	27.2872	2.31147	0.0660399	0.21688
LIG1	0.209947	29.2185	2.30928	0.0662259	0.217182
YES1	-0.370043	28.1998	-2.30817	0.0663201	0.217265
CAP1	-0.198527	31.9077	-2.30346	0.0667227	0.218359
AARS	-0.226623	31.3191	-2.30299	0.0667633	0.218359
SCFD1	-0.259537	28.4693	-2.29942	0.06707	0.219183
TOMM34	-0.276238	28.3972	-2.29415	0.0675256	0.219668
PSMB3	-0.223411	29.7839	-2.29394	0.0675434	0.219668
ATP1B3	0.292758	30.194	2.29267	0.0676544	0.219668
EFTUD1	-0.408407	27.0053	-2.29235	0.0676817	0.219668
CHD8	0.300557	25.6934	2.29214	0.0677004	0.219668
CLNS1A	0.421588	28.5756	2.292	0.0677126	0.219668
PDCD5	-0.19485	30.3994	-2.29089	0.0678087	0.219682
PGRMC1	-0.309409	29.2973	-2.29006	0.0678818	0.219682
MRPS35	0.280533	28.0485	2.28838	0.0680285	0.219979
QRICH1	0.36266	28.5238	2.28764	0.0680934	0.220011
ALDH6A1	-0.31538	27.506	-2.28401	0.0684119	0.220705
H2AFY	-0.196219	32.2362	-2.28393	0.0684185	0.220705
LYPLA1	-0.261737	29.6265	-2.27966	0.0687957	0.221564
MRPL32	0.315128	28.2918	2.27868	0.0688821	0.221664
RSBN1	0.3496	24.9375	2.27656	0.0690709	0.222085
PAPSS1	-0.379639	28.8524	-2.27596	0.069124	0.222085
DNAJC3	0.435909	26.6224	2.27273	0.0694121	0.222347
TPT1	0.206229	30.1554	2.2727	0.0694145	0.222347
NUDT19	-0.392719	26.6597	-2.27154	0.0695181	0.222347
TPM3	-0.221659	31.2092	-2.27077	0.0695872	0.222347
EPB41L2	-0.1919	30.6765	-2.27075	0.0695893	0.222347
RRP15	-0.289627	27.3548	-2.27007	0.0696502	0.222347
GSPT1	-0.20499	30.6647	-2.26932	0.0697176	0.222385
COX7A2	-0.625846	27.6597	-2.26762	0.0698705	0.222695
AKR7A2	0.220058	27.7355	2.26642	0.0699787	0.222862
HSPA13	-0.740509	24.7577	-2.24263	0.0840036	0.246455
CTDSPL2	-0.507974	26.1436	-2.2416	0.0841029	0.246455
GNA13	-0.285863	26.8449	-2.26403	0.0701941	0.223251
HMGB2	-0.261489	32.3164	-2.26383	0.0702125	0.223251
CDKAL1	0.610296	26.0078	2.26231	0.07035	0.223471
CD55	-0.231583	25.8798	-2.26141	0.0704314	0.223471
WDR33	0.266357	27.8033	2.25666	0.0708644	0.224306
ARL6IP5	0.197926	28.6425	2.25648	0.0708808	0.224306
HIST1H2BB	-0.325683	32.0556	-2.25436	0.0710741	0.22474
DNM2	-0.223128	29.4509	-2.25263	0.0712328	0.225064
GGA3	0.317615	24.9654	2.22738	0.0854938	0.247976
UBE2G1	0.271173	26.5072	2.25183	0.0713068	0.22512
RAB4A	-0.345913	26.5827	-2.2505	0.0714293	0.225304
SSRP1	-0.212516	31.25	-2.24997	0.0714776	0.225304
BAG2	-0.190301	29.8163	-2.24389	0.0720405	0.226666
DCAF13	0.341706	26.8644	2.24292	0.0721312	0.226666
HCFC1	-0.200018	30.287	-2.24286	0.0721365	0.226666
IMPA1	0.632644	24.4721	2.21122	0.0871059	0.249858
EXOC4	-0.500075	24.8132	-2.2348	0.0728915	0.228388
MED23	-0.618446	25.2555	-2.23476	0.0728947	0.228388
PREB	0.5744	27.6013	2.23457	0.072913	0.228388
DCTN1	0.198302	28.9551	2.23284	0.0730761	0.22872
RPL29	0.225559	30.1283	2.23192	0.073163	0.228756
CTBP2	0.260866	28.889	2.2315	0.073202	0.228756
YWHAZ	0.215226	33.1133	2.22998	0.0733461	0.229028
TBRG4	-0.220463	29.0091	-2.22851	0.0734862	0.229286
DEF6	0.213349	25.7832	2.22737	0.0735945	0.229445
SPCS2	-0.310114	28.2604	-2.22575	0.073748	0.229648
AMPD2	0.215494	27.5609	2.22548	0.0737744	0.229648
EPS15L1	-0.365518	26.6792	-2.22326	0.0739864	0.230011
COA6	0.250543	25.8719	2.22305	0.074006	0.230011
CSNK1A1	-0.401594	26.4741	-2.22023	0.0742761	0.230497
GLRX	0.517937	25.9149	2.22022	0.0742775	0.230497
XPO5	-0.191218	29.3496	-2.21912	0.0743828	0.230644
VWA9	-0.456115	29.5262	-2.2176	0.0745288	0.230918
GSDMD	-0.493783	26.9219	-2.21579	0.0747037	0.231167
LGALS1	0.21335	31.332	2.21557	0.0747247	0.231167
RPS3A	0.201305	32.5108	2.21233	0.0750384	0.231782
MRPS17	-0.411795	27.959	-2.21232	0.0750396	0.231782
IPO9	-0.340671	28.9285	-2.21165	0.0751047	0.231805
DUT	-0.302455	31.666	-2.20874	0.0753885	0.232501
GUK1	-1.20035	25.9043	-2.17719	0.0906101	0.255676
MRPS18B	-0.352892	27.3496	-2.20514	0.0757404	0.233143
SLC38A2	0.320145	25.8515	2.20464	0.0757887	0.233143
DCUN1D1	-0.198162	27.5827	-2.20423	0.0758296	0.233143
SERPINB1	-0.235103	31.3136	-2.20151	0.0760968	0.233784
ARL1	0.263243	27.7016	2.19654	0.0765882	0.235113
POLR3D	-0.699054	24.9554	-2.16525	0.0918757	0.257175
RGS10	-0.291044	27.8588	-2.19364	0.0768761	0.235816
MAP7D3	0.258457	25.2411	2.1924	0.0769996	0.236014
MRPS11	-0.380625	25.7567	-2.18924	0.0773157	0.236802
ASL	-0.286739	26.092	-2.18817	0.0774225	0.236947
GPD1L	0.334413	27.1142	2.18451	0.0777906	0.23771
ZNF22	0.250905	27.7082	2.18219	0.0780247	0.238056
PEBP1	0.199558	32.7876	2.18042	0.078204	0.238119
TBCB	0.186085	28.8381	2.17966	0.0782812	0.238119
PSMD2	-0.206069	31.4587	-2.17966	0.0782816	0.238119
MRPL37	-0.304197	27.4524	-2.17853	0.0783957	0.238202
NDUFB5	0.803632	26.7967	2.1744	0.0788168	0.239201
C18orf21	-0.578101	25.2243	-2.17345	0.0789147	0.239277
USP24	0.435346	26.7454	2.17258	0.0790034	0.239277
DVL2	-0.432971	23.8988	-2.14061	0.0945494	0.262091
PXN	-0.390276	26.545	-2.17182	0.079081	0.239277
COMMD4	-0.614447	24.8944	-2.16927	0.079343	0.239888
FEN1	-0.184569	30.6959	-2.16685	0.079593	0.240462
UBAC1	0.505015	25.518	2.1657	0.0797117	0.240639
TRAF3IP3	-0.293388	23.5202	-2.13275	0.0954202	0.263228
CDC16	0.675948	26.0294	2.16165	0.0801319	0.241319
PIN4	-0.268943	27.9989	-2.16148	0.0801492	0.241319
DAK	0.324089	28.1359	2.16095	0.0802043	0.241319
NUDT4	0.410516	26.3687	2.15991	0.0803133	0.241319
UBE4A	0.531224	24.1919	2.1596	0.0803451	0.241319
RYBP	1.09381	25.2921	2.12646	0.0961237	0.264439
GNB2	0.29761	31.1501	2.15818	0.0804932	0.241319
RDH13	-0.727954	24.9673	-2.15736	0.0805789	0.241319
PSMG1	0.273311	27.5414	2.15723	0.0805923	0.241319
GTF2E1	0.198336	26.1285	2.15611	0.0807096	0.241319
NDUFAF3	0.827133	26.08	2.12295	0.0965179	0.265159
ACOT9	0.351756	26.0126	2.15537	0.0807873	0.241319
RQCD1	-0.335129	27.2539	-2.15533	0.0807915	0.241319
THYN1	-0.261886	29.185	-2.15438	0.0808919	0.241319
ITGA4	-0.271168	28.6844	-2.15428	0.0809021	0.241319
KIAA1279	0.273751	27.291	2.15145	0.0812002	0.2415
SMARCE1	0.459275	27.5145	2.15005	0.0813477	0.2415
VAMP7	-0.432612	27.0403	-2.14983	0.0813712	0.2415
PDCD6IP	0.215974	31.1676	2.14978	0.0813763	0.2415
REPS1	-0.317273	27.3511	-2.14935	0.0814213	0.2415
NUCKS1	0.23121	29.4479	2.14912	0.0814457	0.2415
HMGN5	-0.437941	29.2632	-2.14764	0.0816024	0.241785
FKBP11	-0.209255	27.4468	-2.14626	0.0817496	0.241895
RAC1	-0.228864	30.8033	-2.1458	0.0817979	0.241895
SNUPN	0.566195	26.4631	2.14557	0.0818221	0.241895
CORO1B	0.373157	26.0645	2.14245	0.0821555	0.242525
CTHRC1	0.266468	27.0414	2.14165	0.0822403	0.242597
ORC4	-0.635121	25.292	-2.14098	0.0823126	0.242631
NELFB	-0.425132	28.1164	-2.13886	0.0825396	0.243121
HDHD1	0.530278	24.6432	2.13492	0.0829626	0.244187
MSN	-0.183842	33.4658	-2.13395	0.0830682	0.244318
PYCRL	-0.36681	24.8173	-2.09943	0.0992099	0.268316
SH3GL1	0.234426	27.2718	2.13283	0.0831884	0.244492
DERL2	0.790814	24.4664	2.12929	0.0835723	0.24544
DNAJA1	0.192639	31.6784	2.12128	0.0844477	0.246818
PAIP1	-0.396039	27.0556	-2.12105	0.0844736	0.246818
CCNK	0.311168	26.7612	2.11935	0.0846604	0.247184
HINT2	-0.502054	27.9718	-2.11815	0.084793	0.247244
IDE	0.380329	28.334	2.11748	0.0848662	0.247244
GFI1	0.244124	25.8493	2.11748	0.0848666	0.247244
NONO	-0.200431	32.8316	-2.1161	0.085019	0.247508
FAM49B	-0.206235	30.0214	-2.11327	0.0853333	0.24782
PDAP1	-0.211308	30.3285	-2.11295	0.0853692	0.24782
RNPS1	-0.213809	29.2424	-2.1129	0.0853738	0.24782
ISYNA1	-0.306267	28.2673	-2.11131	0.0855516	0.247976
UQCRC1	0.184834	31.1676	2.11042	0.0856506	0.248083
SDHA	-0.179358	30.9622	-2.10906	0.0858016	0.24834
RB1	-0.251423	30.0867	-2.10724	0.0860058	0.248751
GPN1	-0.295547	27.2629	-2.10596	0.0861495	0.248879
CHERP	0.18286	29.2958	2.10536	0.0862169	0.248879
UBE2E1	0.233806	25.5268	2.10443	0.0863206	0.248879
RASSF2	0.40236	24.2806	2.06764	0.10298	0.274075
HNRNPUL1	0.201448	31.2112	2.10409	0.0863589	0.248879
TBP	-0.402182	23.8354	-2.10408	0.0863609	0.248879
MTX1	-0.267541	26.7223	-2.10185	0.0866112	0.249349
BCKDHB	-0.333565	26.832	-2.10152	0.0866489	0.249349
POLR3C	0.30764	25.4984	2.0638	0.103445	0.274648
COASY	-0.561862	26.8276	-2.10009	0.0868105	0.249526
HNRNPC	-0.193591	32.8097	-2.09987	0.086835	0.249526
TMPO.1	0.217691	30.9553	2.09837	0.0870056	0.249837
SUMF2	0.242903	27.9281	2.0972	0.087138	0.249858
TMEM41B	-0.36041	25.7283	-2.05901	0.104029	0.275027
AKAP8	0.283658	26.816	2.09361	0.0875469	0.250802
SRSF11	0.303491	28.9349	2.09321	0.0875925	0.250802
LAS1L	-0.259417	27.2174	-2.08815	0.0881717	0.252191
CFAP20	-0.434573	27.7723	-2.08787	0.0882037	0.252191
RPL26	-0.245955	31.1531	-2.08618	0.0883984	0.252567
LIN7C	0.337487	25.5939	2.08276	0.0887937	0.253169
SRA1	-0.413856	25.9028	-2.08191	0.0888926	0.253255
PATL1	-0.280465	26.6386	-2.07935	0.0891893	0.253531
SERPINH1	-0.197225	30.1636	-2.07896	0.0892354	0.253531
RECQL	-0.205105	28.4674	-2.07892	0.0892399	0.253531
ARNT	0.564979	27.5886	2.07889	0.0892427	0.253531
PSMB8	-0.247186	28.3212	-2.07585	0.0895975	0.254177
PRDX5	0.212486	31.1532	2.07519	0.0896746	0.254216
LSM6	-0.315082	27.8102	-2.07152	0.0901056	0.255076
MIF	0.440795	29.6812	2.0699	0.0902963	0.255269
MRPL38	-0.332148	26.5902	-2.06985	0.0903016	0.255269
TMED2	-0.22166	29.5678	-2.06642	0.0907076	0.255676
PGAM5	-0.183623	29.1403	-2.06641	0.0907087	0.255676
SOD1	-0.190046	32.8228	-2.06581	0.0907792	0.255676
SAP130	-0.438885	25.617	-2.06566	0.0907978	0.255676
KIF2A	-0.24108	29.5612	-2.06539	0.0908291	0.255676
ZBTB9	-0.564946	22.0223	-2.06376	0.0910228	0.256011
PYGB	0.24582	29.4933	2.06146	0.0912965	0.256451
BLMH	0.171285	28.6266	2.05989	0.0914838	0.256797
ATOX1	0.173137	28.6562	2.05824	0.0916806	0.257
DYNLL1	-0.244479	29.7724	-2.05821	0.0916847	0.257
HSPA14	-0.213734	29.3402	-2.05749	0.0917711	0.257062
TMED7	-0.234643	27.4722	-2.05608	0.0919402	0.257175
VPS33A	0.454226	25.7067	2.05388	0.0922043	0.25765
PNKP	0.770756	25.8042	2.0536	0.0922386	0.25765
COX4I1	-0.233061	29.898	-2.05298	0.0923137	0.257679
BCAT1	-0.223966	30.358	-2.05108	0.0925432	0.25814
GNG2	-0.236592	27.1164	-2.05035	0.0926313	0.258206
FLAD1	0.527492	26.8487	2.04883	0.0928151	0.258538
CLPP	0.462595	27.6381	2.04605	0.0931531	0.259299
GATB	0.417753	25.7446	2.04352	0.0934607	0.259795
SNRNP40	0.192338	30.2024	2.04352	0.0934613	0.259795
LEPRE1	0.178813	28.4559	2.04294	0.0935318	0.259811
AKR1B1	-0.181729	31.4182	-2.04025	0.0938622	0.260547
XXYLT1	-0.338124	25.3907	-2.03585	0.0944026	0.261866
CHMP1A	0.201383	27.8926	2.03181	0.0949031	0.262707
SKIV2L2	-0.191777	30.3554	-2.02894	0.0952592	0.263228
PCMT1	-0.234244	30.5013	-2.02808	0.0953665	0.263228
TTN	0.30054	29.6679	2.02803	0.095373	0.263228
LAIR1	-0.296875	25.9672	-2.02796	0.0953826	0.263228
KDM1A	0.187461	27.9548	2.02662	0.0955489	0.263402
PTGES2	-0.200141	27.7213	-2.02461	0.0958007	0.263914
SUPT16H	0.196271	31.1716	2.02365	0.0959215	0.264065
RPE	0.295582	26.2887	2.01957	0.0964348	0.265113
NCOR1	-0.209377	26.5428	-2.0182	0.0966079	0.265224
CCDC12	-0.266374	28.1288	-2.01666	0.0968025	0.265547
TST	0.72633	26.2925	2.01599	0.0968877	0.265547
GOSR1	-0.388851	25.8538	-2.0157	0.0969246	0.265547
PSMD3	-0.175628	31.2421	-2.01134	0.0974788	0.266882
SNAP23	0.222745	28.2266	2.01037	0.0976022	0.267038
GDI1	-0.418653	28.5059	-2.00911	0.0977641	0.267141
DYNLL2	-0.198438	27.1064	-2.00903	0.0977737	0.267141
VPS51	-0.435449	25.1122	-2.00726	0.0980008	0.267375
PAM16	0.377147	27.1984	2.00574	0.0981963	0.267375
ASPSCR1	0.184728	27.3291	2.00478	0.0983193	0.267375
ICAM3	-0.290915	28.4332	-2.00435	0.0983752	0.267375
HDGFRP2	-0.63989	27.7674	-2.00432	0.0983793	0.267375
ARMC6	-0.253266	26.7344	-2.00353	0.0984807	0.267375
IMPDH1	-0.263749	25.0558	-2.00347	0.0984888	0.267375
STK4	-0.244153	26.5422	-2.00345	0.0984904	0.267375
SSU72	0.253114	27.7383	2.00316	0.0985277	0.267375
GYPC	0.447127	25.4434	2.00147	0.0987462	0.267713
SAMM50	0.30119	28.1386	1.99948	0.0990036	0.268121
ABRACL	-0.188077	31.1257	-1.99865	0.0991119	0.268233
HDAC6	-0.549379	24.5999	-1.95338	0.117861	0.29568
TCF3	0.183765	26.6408	1.99422	0.0996886	0.269144
ATP11C	-0.359191	24.7288	-1.94861	0.118531	0.296885
NQO1	0.355035	28.8932	1.9925	0.099914	0.269459
CA8	0.307807	29.0764	1.99207	0.0999692	0.269459
SF3B5	-0.438154	28.6032	-1.99079	0.100137	0.26973
ESYT2	-0.21886	29.8397	-1.98969	0.100282	0.269815
AHSA1	-0.168011	31.9792	-1.98901	0.100371	0.269815
CARS	-0.189879	28.2785	-1.98756	0.100562	0.270146
CYC1	-0.272957	30.757	-1.98396	0.101038	0.271242
KCMF1	0.359985	25.1752	1.9821	0.101285	0.271723
PIEZO1	-0.378137	25.5733	-1.93671	0.12022	0.298868
NUP43	-0.182097	28.816	-1.98016	0.101542	0.272231
BCAT2	-0.177869	28.1775	-1.97938	0.101645	0.272236
SQSTM1	0.377449	26.2832	1.97913	0.10168	0.272236
PHAX	0.253628	25.6239	1.97774	0.101865	0.272381
DNAJC17	0.4836	25.3303	1.9777	0.10187	0.272381
CECR5	0.165931	29.5219	1.97549	0.102166	0.272988
EIF2B3	-0.247706	27.779	-1.97408	0.102355	0.273312
CDK5RAP3	0.320564	25.1462	1.97335	0.102453	0.273391
NUDT9	0.476567	25.0576	1.9722	0.102607	0.273619
AKAP2	0.219734	28.2328	1.96941	0.102984	0.274075
APLP2	-0.33097	27.7603	-1.96579	0.103474	0.274648
SSB	-0.176463	32.3531	-1.96414	0.103697	0.274852
SEC61B	-0.259748	28.7795	-1.96367	0.103761	0.274852
TEX30	0.282003	25.9445	1.96333	0.103808	0.274852
CCAR1	-0.164111	29.8143	-1.9628	0.10388	0.274852
RRS1	0.299384	27.5527	1.96269	0.103894	0.274852
ZNF609	-0.392564	25.5617	-1.95928	0.104361	0.275699
FHL3	1.14218	25.4208	1.95884	0.104421	0.275699
CCT8	-0.189894	33.1034	-1.95677	0.104705	0.27626
RARS	-0.175848	30.4316	-1.95628	0.104771	0.27626
PGP	-0.210551	28.0891	-1.95427	0.105049	0.276808
BUD31	0.216821	28.7669	1.95183	0.105385	0.27733
EML4	-0.212186	28.7601	-1.94938	0.105725	0.277974
RAB7A	0.165432	30.8503	1.9482	0.105889	0.277974
CYB5A	0.311503	27.0785	1.94802	0.105914	0.277974
SPC25	-1.09462	24.7819	-1.94746	0.105991	0.277974
GCN1L1	-0.193671	29.7627	-1.94637	0.106143	0.278044
PQLC1	-0.308127	22.7462	-1.94582	0.10622	0.278063
HEBP2	-0.348153	27.6301	-1.94456	0.106396	0.278287
AUP1	-0.377859	25.7721	-1.94421	0.106445	0.278287
SUB1	0.235905	31.3049	1.94344	0.106552	0.278289
RNF169	0.394702	25.5359	1.94321	0.106585	0.278289
CSTB	-0.182958	30.235	-1.94051	0.106962	0.279093
MYL3	0.309866	28.4659	1.93954	0.107099	0.279266
MPG	0.32542	26.9648	1.93898	0.107178	0.279292
PTTG1	0.677315	23.7578	1.88802	0.127402	0.30998
PAIP2	-0.445857	26.4602	-1.9362	0.107569	0.280128
GNL3	-0.199818	28.9257	-1.935	0.10774	0.280223
DYNC1H1	-0.161349	32.4965	-1.93475	0.107774	0.280223
AIFM1	-0.217856	30.4099	-1.93402	0.107879	0.280223
PYURF	0.350218	25.2428	1.93396	0.107886	0.280223
ELP4	0.450034	25.1543	1.93289	0.108038	0.280436
MB21D1	-0.223949	26.8884	-1.93165	0.108214	0.28071
PPP1R9B	0.282644	28.1626	1.92716	0.108854	0.282187
GCLM	0.296012	24.9985	1.87834	0.128883	0.313012
SP1	0.213501	26.8977	1.92467	0.109211	0.28293
NBN	0.295013	24.1323	1.92264	0.109503	0.283319
STAM2	0.318004	24.6409	1.8735	0.129631	0.313307
PTMS	0.248471	29.3115	1.92158	0.109654	0.283527
NOL6	-0.351723	27.4929	-1.92004	0.109877	0.283815
ZFP91	0.179227	24.8903	1.9184	0.110114	0.284166
RPS15A	-0.178197	30.4735	-1.91735	0.110265	0.284372
DDX18	-0.162681	30.194	-1.91407	0.110741	0.28529
XPNPEP1	-0.20311	28.4157	-1.91392	0.110764	0.28529
PIN1	0.173354	29.088	1.91316	0.110874	0.285391
SAR1A	-0.189556	30.3624	-1.91068	0.111236	0.286137
CTSD	-0.164673	30.0646	-1.9077	0.111673	0.286892
UBTF	-0.270108	29.5129	-1.90711	0.11176	0.286931
VAC14	0.376538	25.7986	1.90627	0.111883	0.287062
ACO2	-0.176191	31.2395	-1.90574	0.11196	0.287078
HEXB	-0.161559	28.4104	-1.90459	0.11213	0.287185
TMA7	0.284299	29.3671	1.90422	0.112184	0.287185
MCCC2	-0.172602	28.647	-1.90399	0.112218	0.287185
SF3B6	-0.227478	28.2067	-1.90137	0.112606	0.287995
CPT2	-0.38652	25.212	-1.90016	0.112784	0.288266
STAU1	0.306717	28.0363	1.89816	0.113082	0.288842
UCHL3	-0.191504	29.1113	-1.89698	0.113257	0.289106
SAMD1	0.221408	25.6198	1.89416	0.113677	0.28959
PPP2R1B	0.187662	27.4105	1.89405	0.113694	0.28959
PCNA	0.200421	32.9666	1.89377	0.113737	0.28959
RPL35	0.353471	30.2187	1.89194	0.11401	0.290101
NUP107	0.171024	28.356	1.88947	0.114381	0.290828
PLS1	0.433548	25.3362	1.88862	0.114508	0.290828
RBM39	0.18133	30.7033	1.88853	0.114522	0.290828
SUMO3	0.36046	25.7933	1.88795	0.11461	0.290828
LCP1	-0.16066	32.3176	-1.88762	0.114659	0.290828
TRIAP1	0.420237	25.5368	1.88544	0.114989	0.291295
MTHFD1	-0.15878	32.1929	-1.88471	0.115099	0.291298
ARHGAP17	0.551415	25.7654	1.88447	0.115135	0.291298
GINS3	-0.317937	25.5194	-1.88377	0.115241	0.291324
COA4	-0.693075	26.9412	-1.88335	0.115305	0.291324
TALDO1	0.21145	31.5516	1.88296	0.115364	0.291324
CTSC	0.178649	29.7074	1.88138	0.115603	0.291743
SSNA1	0.254673	25.9306	1.82812	0.136868	0.321664
GFM1	-0.230892	28.4382	-1.87819	0.11609	0.292616
ITCH	-0.293349	28.023	-1.87813	0.116099	0.292616
RAB5B	-0.227405	26.6515	-1.87767	0.116168	0.292616
KHDRBS3	-0.449194	25.4879	-1.87684	0.116295	0.292751
YY1	-0.464656	27.4695	-1.87395	0.116739	0.293683
PPP1CB	0.208216	28.9922	1.87308	0.116872	0.293833
AP1S1	0.204159	26.4613	1.87129	0.117148	0.294342
PLOD3	0.191991	27.0201	1.86853	0.117574	0.295227
WDR61	0.166264	29.3917	1.86624	0.117928	0.29568
PDLIM7	0.285496	26.4848	1.86593	0.117976	0.29568
UNCX	-0.642596	25.5313	-1.86002	0.118898	0.297315
PFDN1	0.270748	28.1202	1.85992	0.118912	0.297315
PTGES3	-0.181327	31.9834	-1.85984	0.118926	0.297315
MCRS1	-0.280587	25.3731	-1.85614	0.119506	0.298132
TRMT61A	-0.162435	25.0548	-1.85612	0.119509	0.298132
TRIP6	0.173167	28.1997	1.85547	0.119611	0.298132
TRIM65	-0.254225	27.1921	-1.85538	0.119625	0.298132
TPP2	-0.191113	30.6689	-1.85446	0.119771	0.298309
NEMF	-0.265379	26.6262	-1.85302	0.119997	0.298685
KTN1	-0.157803	30.7934	-1.85166	0.120212	0.298868
REXO4	-0.157948	25.4816	-1.85108	0.120305	0.298894
NPEPPS	-0.158972	31.2895	-1.84576	0.12115	0.300806
TOMM70A	0.169928	29.7118	1.84227	0.121707	0.302004
DYNC2H1	-1.33901	26.357	-1.78594	0.143978	0.330984
SERPINB6	-0.213046	29.0554	-1.83979	0.122105	0.302802
TOMM40	-0.329635	30.4844	-1.83887	0.122252	0.302979
PFAS	-0.171956	30.3034	-1.83811	0.122375	0.303097
UQCC1	-0.450488	26	-1.83702	0.122551	0.303345
TRIM25	-0.174499	29.5833	-1.83587	0.122736	0.303613
MCCC1	-0.256952	26.943	-1.83207	0.123352	0.304621
ADAM10	-0.195067	28.0359	-1.83195	0.123371	0.304621
CSNK2A1	-0.178502	30.4347	-1.83052	0.123604	0.30491
DCTN6	-0.656724	25.7751	-1.83029	0.123641	0.30491
PRSS57	-0.450878	24.1711	-1.82856	0.123923	0.305417
RCBTB2	0.158026	24.0996	1.82143	0.125092	0.307614
ATP6AP1	-0.493206	26.9551	-1.82125	0.125122	0.307614
ATP2A2	-0.160036	31.7559	-1.81904	0.125485	0.308317
MAP7D1	0.959959	25.3457	1.81826	0.125615	0.30837
ACOT13	-0.161564	28.3704	-1.81798	0.125661	0.30837
PDHB	0.190893	30.0539	1.81706	0.125813	0.308536
MYO1G	0.220767	30.1445	1.81664	0.125883	0.308536
ME2	-0.188487	30.7944	-1.81499	0.126157	0.309019
ASNS	-0.180147	32.1522	-1.81324	0.126448	0.309543
TIMM8A	0.344921	25.6086	1.81269	0.12654	0.309578
CIAPIN1	0.235195	29.0845	1.81082	0.126851	0.309833
DPCD	0.387329	24.9536	1.81029	0.12694	0.309833
NOC2L	-0.206404	28.2648	-1.80986	0.127011	0.309833
GALNT1	-0.253829	26.9218	-1.80974	0.127032	0.309833
POGZ	0.227973	28.7848	1.80914	0.127132	0.309863
RPL11	0.15714	30.5692	1.80842	0.127252	0.309863
CTCF	0.196906	29.4086	1.80828	0.127276	0.309863
TMX1	-0.256433	29.3028	-1.7998	0.128705	0.312815
DCAF7	-0.194215	27.2662	-1.79969	0.128723	0.312815
MYCBP	-0.346061	26.5852	-1.798	0.12901	0.313039
RSL1D1	-0.172813	30.8824	-1.79774	0.129054	0.313039
C8orf33	-0.541238	26.8633	-1.79725	0.129138	0.313039
NOP56	0.157566	30.355	1.79685	0.129207	0.313039
PACSIN2	0.269772	27.5037	1.79619	0.129318	0.313119
C20orf27	0.378069	26.6141	1.79465	0.12958	0.313307
RPP30	0.256239	26.8306	1.79458	0.129593	0.313307
NUP160	-0.166488	28.5357	-1.79374	0.129736	0.313373
OAT	-0.198391	30.3628	-1.79225	0.129992	0.3138
OTUD4	-0.218733	24.7225	-1.79151	0.130118	0.313916
POLD2	0.209189	27.6465	1.79005	0.130369	0.314302
TXNL1	-0.158781	30.0104	-1.78957	0.13045	0.314302
GTPBP10	-0.310882	24.2447	-1.73122	0.153784	0.341324
SDAD1	0.343052	25.0248	1.78849	0.130635	0.314302
FAF2	0.157156	27.7976	1.78835	0.13066	0.314302
RRP12	-0.246769	28.9445	-1.78829	0.130671	0.314302
PSMA5	-0.244486	30.1779	-1.78609	0.13105	0.314681
SLC25A29	0.402274	26.403	1.78543	0.131163	0.314681
MMS19	-0.302345	28.609	-1.78518	0.131206	0.314681
TMSB4X	0.218394	33.9248	1.78509	0.131222	0.314681
RWDD4	-0.485065	25.1405	-1.78423	0.131371	0.314851
LIMD1	0.323835	26.602	1.78352	0.131495	0.314958
USP48	-0.202875	27.4171	-1.78202	0.131754	0.315217
HSPE1	0.165734	33.3513	1.78198	0.131761	0.315217
MRPS25	-0.354057	25.5836	-1.78138	0.131866	0.31528
PSMC3	0.183948	31.2464	1.77936	0.132217	0.315805
SYNGR2	-1.56941	26.0369	-1.77921	0.132243	0.315805
PDCD10	-0.239174	27.3033	-1.77831	0.132399	0.315988
PQBP1	0.225593	28.6246	1.77751	0.13254	0.316135
LARP4B	0.351806	27.2375	1.7738	0.133189	0.317494
ZNF555	-0.418063	25.2611	-1.77052	0.133765	0.318229
IDH3A	-0.203443	28.5918	-1.77007	0.133845	0.318229
WAC	0.256709	26.2174	1.77001	0.133854	0.318229
FNDC3A	0.300478	27.7245	1.76993	0.133869	0.318229
TIAL1	-0.16691	28.9858	-1.76974	0.133902	0.318229
NOP14	0.324552	26.8517	1.76877	0.134073	0.318229
RBBP7	-0.171356	30.7585	-1.76853	0.134115	0.318229
TIMELESS	0.283275	25.4771	1.76843	0.134134	0.318229
AP2S1	0.345299	27.1274	1.76659	0.13446	0.318578
UBQLN1	-0.264342	29.4608	-1.76546	0.134658	0.318578
BCKDHA	-0.260156	27.2144	-1.76532	0.134685	0.318578
CLIC4	-0.151774	30.2713	-1.76518	0.134709	0.318578
BTF3	0.175381	30.4913	1.76512	0.13472	0.318578
STOM	-0.213668	29.854	-1.7649	0.134758	0.318578
ANXA7	0.159965	30.3928	1.76416	0.13489	0.318701
SRRM2	0.166162	30.4655	1.76337	0.13503	0.318843
SAMSN1	-0.174503	30.2807	-1.76278	0.135136	0.318906
FUS	0.173389	31.6962	1.76093	0.135466	0.319306
SUCLA2	-0.15814	28.6883	-1.76045	0.135551	0.319319
FH	-0.173276	30.7005	-1.75649	0.13626	0.320801
TPP1	0.282369	26.5137	1.75478	0.136567	0.321262
EIF3D	0.169722	30.75	1.7545	0.136617	0.321262
SNF8	0.292883	25.6381	1.75112	0.137226	0.322316
GPD2	-0.170463	27.3793	-1.75028	0.137379	0.322486
CUL4A	-0.213181	28.5011	-1.74827	0.137743	0.322865
DNTTIP2	-0.166412	28.4644	-1.74809	0.137776	0.322865
CUL1	-0.178607	28.7937	-1.74805	0.137782	0.322865
SF3A1	-0.148142	31.2933	-1.74737	0.137907	0.322967
BOLA2	-0.333205	28.1521	-1.74529	0.138285	0.323663
DRG1	0.185875	29.3472	1.74418	0.138487	0.323756
IQGAP2	0.203858	29.2167	1.74373	0.13857	0.323761
RPA2	-0.377071	28.066	-1.74241	0.13881	0.32403
TFCP2	0.276165	26.9975	1.74088	0.139089	0.324406
GTPBP1	-0.180893	27.4436	-1.73943	0.139356	0.324748
MDH1	0.150305	31.951	1.7392	0.139398	0.324748
HSD17B11	0.158622	29.6568	1.73799	0.13962	0.325076
HIST1H1E	0.169229	32.8587	1.73695	0.139812	0.325334
TSTA3	-0.421461	26.4336	-1.67551	0.164484	0.353159
ATP5C1	-0.274568	30.0204	-1.73446	0.140272	0.326135
U2SURP	0.20967	29.7932	1.7342	0.14032	0.326135
RPLP1	-0.249102	32.5677	-1.73368	0.140415	0.326167
MESDC2	0.306809	27.8157	1.73215	0.140698	0.326635
SEC23A	-0.233637	29.4108	-1.73136	0.140846	0.326661
FARSA	0.160495	29.7832	1.73121	0.140872	0.326661
MEAF6	-0.407508	24.9432	-1.72682	0.14169	0.328366
HIST1H1B	-0.164638	33.2367	-1.72502	0.142026	0.328955
PHACTR4	0.36493	25.0166	1.66355	0.166882	0.355082
DTD1	0.318	24.9257	1.72425	0.142171	0.329074
UBR7	0.149024	28.694	1.72387	0.142242	0.329074
BCAS2	0.195728	28.9821	1.72118	0.142746	0.329507
SRPRB	0.445854	28.1005	1.72046	0.142882	0.329507
CAPN15	-0.220082	24.9682	-1.72045	0.142883	0.329507
RBM5	0.292096	24.9934	1.71872	0.143209	0.329803
SNX8	0.203193	24.781	1.71868	0.143217	0.329803
XRCC6	-0.161169	32.4111	-1.71582	0.143758	0.330859
HPS6	0.248673	23.0875	1.71529	0.143858	0.330899
TRMT10C	-0.183924	28.9583	-1.71268	0.144353	0.331656
PRSS21	0.32244	27.2611	1.71121	0.144633	0.331982
DDX12P	0.455176	23.7927	1.71034	0.144798	0.331982
MPP1	-0.184533	26.8065	-1.70947	0.144965	0.331982
SLC9A3R1	0.163708	30.8895	1.70927	0.145002	0.331982
SMARCAD1	-0.464055	26.7893	-1.70919	0.145018	0.331982
ELP2	0.146691	28.126	1.70906	0.145042	0.331982
TUBB8	0.168158	33.5523	1.70889	0.145076	0.331982
PLEK	-0.154846	30.0243	-1.70655	0.145524	0.332519
RNASET2	-0.179322	26.3635	-1.70636	0.14556	0.332519
ATP5EP2	0.497095	28.0461	1.70636	0.14556	0.332519
CHID1	-0.194703	28.0822	-1.70557	0.14571	0.332525
HEXIM1	-0.222876	27.1266	-1.70481	0.145857	0.332626
TUBA1A	-0.152164	35.45	-1.70346	0.146116	0.333029
POLD1	-0.233228	29.2824	-1.70272	0.146258	0.333162
CCNB1	0.206748	26.5529	1.6359	0.172558	0.360623
RPS17	0.238394	31.9689	1.69579	0.1476	0.335505
MEN1	-0.226235	26.2736	-1.69578	0.147601	0.335505
RTN4	-0.185381	29.4358	-1.69524	0.147705	0.335505
C17orf75	-0.358081	23.9652	-1.69524	0.147706	0.335505
CELF2	0.25943	28.9089	1.69194	0.14835	0.336673
UFM1	-0.205692	27.6155	-1.69151	0.148434	0.336673
CCT2	-0.154618	33.3852	-1.69131	0.148473	0.336673
RRP9	0.181455	28.8771	1.69046	0.14864	0.33686
MRPL49	0.283268	26.8543	1.68917	0.148891	0.337239
CDV3	-0.146746	30.5763	-1.6865	0.149417	0.338238
ZWINT	0.303375	24.9215	1.68517	0.149677	0.338452
MTA1	-0.192242	29.2012	-1.68493	0.149725	0.338452
CLPTM1L	0.183889	26.1859	1.6842	0.149869	0.338452
PCNP	-0.174769	28.5915	-1.68384	0.14994	0.338452
ZC3H7B	-0.208724	24.3931	-1.68344	0.150019	0.338452
MGST3	0.273842	25.7106	1.68076	0.15055	0.339399
MFI2	0.611015	25.1364	1.68046	0.150608	0.339399
CENPC	-0.33044	24.5851	-1.67933	0.150833	0.339715
SH3KBP1	-0.374083	26.1732	-1.67775	0.151146	0.34013
GBAS	0.226607	27.551	1.67708	0.15128	0.34013
SPG20	-0.301492	26.255	-1.67687	0.151321	0.34013
MECP2	0.481001	24.9143	1.67629	0.151437	0.34013
SMARCD1	-0.218077	23.6876	-1.67626	0.151443	0.34013
PGPEP1	0.21628	24.2453	1.61197	0.177634	0.366444
PRIM1	0.210447	27.1538	1.67544	0.151608	0.34031
TCF25	-0.339373	26.3677	-1.67481	0.151734	0.340401
MAGOH	-0.231379	29.6676	-1.67282	0.152131	0.34088
SRM	-0.169119	30.4023	-1.67242	0.152212	0.34088
HEATR3	-0.150506	26.6735	-1.6716	0.152376	0.34088
UTS2	-0.2425	28.8323	-1.67037	0.152623	0.34088
SNIP1	0.314322	25.2754	1.66876	0.152945	0.341051
RAB35	-0.293593	28.4204	-1.66846	0.153007	0.341051
CAPZB	-0.154581	31.6956	-1.66827	0.153045	0.341051
ANXA6	-0.154228	33.6621	-1.66826	0.153046	0.341051
CRIPT	-0.226369	24.907	-1.66681	0.153339	0.341323
NFU1	-0.2085	26.4273	-1.66553	0.153598	0.341324
NDUFB11	0.265922	26.3099	1.60069	0.180077	0.36967
UBXN1	-0.175099	29.7742	-1.66494	0.153717	0.341324
WIBG	0.245861	27.3801	1.66493	0.15372	0.341324
BRAT1	-0.179681	26.3955	-1.66449	0.153808	0.341324
NUDT3	-0.322328	27.5668	-1.66358	0.153994	0.341324
PSMA2	0.198741	30.0972	1.66348	0.154012	0.341324
ADSS	0.172096	29.8562	1.66277	0.154157	0.341324
SLC38A10	-0.301157	24.0835	-1.66272	0.154166	0.341324
HMGCS1	0.154208	28.7107	1.66259	0.154193	0.341324
ZPR1	0.267311	27.0814	1.66	0.15472	0.342301
MRPS7	-0.190703	26.7368	-1.65906	0.154911	0.342517
OLA1	-0.158831	30.5132	-1.65868	0.154989	0.342517
HAUS1	0.48687	23.729	1.59308	0.181745	0.371857
STAT1	0.224398	28.4792	1.65779	0.155171	0.34273
PPM1B	-0.153324	27.9643	-1.65682	0.155368	0.342846
MYO9B	-0.396452	26.155	-1.65669	0.155395	0.342846
KNTC1	-0.379493	25.1861	-1.59133	0.182131	0.372266
MOGS	0.234616	28.5299	1.65514	0.155712	0.343356
CBX2	0.513629	25.1628	1.65325	0.156101	0.344024
PRPF38B	-0.37901	25.9504	-1.65253	0.156249	0.344161
NTPCR	0.205426	25.6969	1.65179	0.1564	0.344303
VBP1	-0.163655	29.8866	-1.64995	0.15678	0.344681
HUWE1	-0.150516	30.99	-1.64986	0.156798	0.344681
CSTF2	-0.22355	28.806	-1.64971	0.15683	0.344681
UBXN7	0.183539	28.9752	1.64885	0.157006	0.344842
HGH1	0.214261	27.5863	1.64835	0.15711	0.344842
GNS	-0.3938	27.4465	-1.64765	0.157256	0.344859
VAPB	0.168298	27.7172	1.64695	0.1574	0.344871
ELOVL5	-0.22729	26.651	-1.64679	0.157434	0.344871
OXA1L	-0.145079	25.4782	-1.64546	0.157709	0.345285
IGF2R	-0.241582	28.5814	-1.64375	0.158063	0.345872
MCM7	-0.137101	32.2744	-1.64275	0.158272	0.346139
MTOR	0.276371	27.5256	1.64174	0.158482	0.346291
CLINT1	-0.193088	28.461	-1.64155	0.158522	0.346291
TIMM23	0.230282	27.3877	1.64117	0.158601	0.346291
GNL2	-0.340821	26.4821	-1.64004	0.158837	0.346616
VAV3	-0.207741	27.5768	-1.63961	0.158928	0.346625
GLMN	0.234664	26.6919	1.63843	0.159174	0.346798
ANKRD17	0.161822	26.3194	1.63747	0.159374	0.346798
UBE2D3	-0.190479	29.8569	-1.63744	0.159382	0.346798
ZC3H18	-0.417276	26.3428	-1.63721	0.15943	0.346798
BRCC3	-0.276596	26.3688	-1.63687	0.159501	0.346798
GTF2E2	-0.455384	25.7572	-1.63675	0.159527	0.346798
FAM98B	-0.182529	28.6251	-1.63609	0.159664	0.346891
ACTR3	-0.160891	31.1895	-1.63571	0.159743	0.346891
KPNB1	-0.160653	32.3084	-1.63451	0.159996	0.347095
STAMBP	0.424077	25.2948	1.63306	0.160301	0.347095
ELAC2	-0.288209	27.8342	-1.63295	0.160325	0.347095
IPO7	-0.215509	29.5883	-1.63268	0.160382	0.347095
NBAS	0.259893	26.6751	1.63238	0.160445	0.347095
RPN1	-0.165442	32.4517	-1.63134	0.160664	0.347382
SEC31A	-0.23447	28.2874	-1.62972	0.161008	0.347937
SEPT9	0.136583	30.0639	1.62611	0.161773	0.349292
SEC16A	0.191967	28.8891	1.62594	0.16181	0.349292
POM121C	0.198623	25.5846	1.62463	0.16209	0.349641
EIF2B2	-0.245851	28.3934	-1.62436	0.162146	0.349641
ATL3	0.198748	28.9751	1.62347	0.162337	0.349865
SLC4A1AP	0.167805	26.572	1.62204	0.162642	0.350332
RNASEH2B	-0.139176	28.7341	-1.62147	0.162763	0.350405
ACP1	-0.240445	28.2943	-1.61527	0.164096	0.352896
IRF3	-0.270611	26.2139	-1.61527	0.164097	0.352896
ACACA	0.168239	28.8785	1.61394	0.164384	0.353159
GNB1	0.142404	30.5905	1.61356	0.164465	0.353159
DDX1	0.140548	30.8398	1.61273	0.164645	0.353316
BMS1	0.201367	29.0747	1.61131	0.164953	0.353786
STT3A	0.159629	29.0869	1.61072	0.16508	0.353869
SEH1L	0.184561	29.6174	1.6101	0.165215	0.353958
MAN2A1	0.342631	26.042	1.60941	0.165364	0.353958
STX7	-0.312268	25.4621	-1.60931	0.165387	0.353958
GCDH	-0.26068	28.7526	-1.60803	0.165665	0.354364
PSMB5	-0.198627	29.9113	-1.60758	0.165763	0.354385
PSMD12	-0.140456	30.965	-1.60652	0.165994	0.354689
MCM6	-0.13647	32.3318	-1.60572	0.166168	0.354871
SLC35F2	0.164826	24.4184	1.53701	0.194533	0.387755
SLC25A22	0.202135	26.4418	1.60467	0.166398	0.355082
NDUFB10	-0.166652	27.8398	-1.60222	0.166936	0.355082
ARPC5	-0.15295	28.2375	-1.60203	0.166976	0.355082
MED14	0.258579	26.9897	1.6016	0.167072	0.355082
PTEN	-0.284825	26.0512	-1.60104	0.167194	0.355082
TBL1XR1	-0.185557	30.2989	-1.60062	0.167286	0.355082
SIGLEC12	-0.430712	25.9061	-1.6006	0.16729	0.355082
TRNT1	-0.225893	25.9658	-1.60041	0.167332	0.355082
MYEOV2	0.246286	26.183	1.59953	0.167525	0.355303
RPL9	-0.133771	31.3754	-1.59879	0.167688	0.35546
PCYT2	-0.274047	26.2892	-1.59611	0.16828	0.356346
TXNDC12	0.162063	29.0491	1.59609	0.168285	0.356346
LRRC47	0.173137	29.5753	1.59552	0.168412	0.356427
ACY1	-0.194281	27.2778	-1.59483	0.168565	0.356533
MTHFD2	0.163693	29.1898	1.59448	0.16864	0.356533
DHRS7	-0.309559	26.7996	-1.59389	0.168772	0.356623
RAD9A	-0.260725	24.5572	-1.59324	0.168916	0.35674
BAP18	-0.969479	26.8695	-1.59213	0.169164	0.357004
FXR1	-0.179972	29.5242	-1.59021	0.16959	0.357595
IMMT	-0.161852	31.2773	-1.58962	0.169721	0.35768
ECSIT	0.680605	24.8528	1.51962	0.19868	0.39323
WDR6	0.212427	26.2714	1.58637	0.170448	0.358349
PEPD	0.147166	28.2664	1.58536	0.170674	0.358349
EEF1G	-0.147464	32.1336	-1.58506	0.170741	0.358349
RPL30	-0.164142	31.3603	-1.58485	0.170788	0.358349
MRPL27	0.348583	29.4783	1.58477	0.170807	0.358349
MRPL1	0.167284	28.7192	1.58422	0.17093	0.358349
NFYA	0.251407	27.1372	1.58381	0.171022	0.358349
RCC1	-0.141608	30.9296	-1.58308	0.171187	0.358506
ITGB1	0.1398	28.8357	1.58084	0.171689	0.35937
PRMT1	-0.157138	31.5843	-1.57907	0.172089	0.360019
PCM1	0.173453	27.4345	1.57831	0.172261	0.360191
ANKRD28	-0.567514	24.8491	-1.57549	0.172901	0.360962
GMPR2	0.132939	27.1105	1.57448	0.17313	0.360972
ACADM	0.17204	29.1544	1.57441	0.173146	0.360972
CTNNA1	-0.449201	27.1798	-1.57388	0.173266	0.360972
LSM4	-0.199201	28.6869	-1.57388	0.173267	0.360972
MAPK3	0.197407	25.6745	1.57235	0.173614	0.361507
ATG3	-0.1635	27.7446	-1.57115	0.173887	0.361621
WDR36	-0.15389	28.589	-1.57113	0.173892	0.361621
TCP1	-0.139168	33.2613	-1.57074	0.173981	0.361621
PSMB2	0.159304	29.764	1.57053	0.17403	0.361621
VDAC1	0.143566	31.9852	1.56926	0.174319	0.362034
HIRA	0.385728	24.8271	1.56447	0.17542	0.363865
HNRNPK	0.137227	34.3856	1.56423	0.175474	0.363865
PEA15	0.148024	26.945	1.56324	0.175703	0.364151
SCARB2	-0.246827	26.7714	-1.56185	0.176024	0.364439
GOLPH3	0.244589	26.9826	1.56133	0.176143	0.364496
GOLPH3L	-0.503485	24.1722	-1.56002	0.176446	0.364934
VRK1	-0.268905	29.5917	-1.55878	0.176734	0.365342
PDE6D	0.385401	25.5329	1.55717	0.177108	0.365804
MRPS26	0.226301	26.3782	1.55703	0.17714	0.365804
MRPS31	0.353946	26.4176	1.55582	0.17742	0.366193
NCDN	-0.378232	24.4749	-1.48425	0.207389	0.404243
RBM33	0.196536	25.5039	1.55237	0.178227	0.367289
PNPLA6	0.339199	25.8955	1.54977	0.178834	0.368345
CERS6	0.410749	26.1236	1.54939	0.178924	0.368345
ZNF12	0.295459	24.7095	1.54763	0.179339	0.36882
MSH2	-0.138596	29.6495	-1.54667	0.179563	0.369092
C12orf73	0.158746	25.4372	1.5443	0.180122	0.36967
MRPL13	0.34596	25.6032	1.54135	0.18082	0.370701
TK1	-0.158393	28.3742	-1.54071	0.180972	0.370701
EEA1	0.241983	27.7338	1.54062	0.180995	0.370701
ZFP30	-0.372502	26.6223	-1.46908	0.211241	0.40864
CAPNS1	0.157525	27.5647	1.53953	0.181252	0.371038
GTF3C4	0.18165	28.052	1.53633	0.182014	0.372216
GNAI1	0.220516	26.1479	1.53153	0.183163	0.373992
EPS15	-0.171973	27.804	-1.53082	0.183333	0.374149
NT5C	-0.230795	28.0158	-1.53005	0.183519	0.374337
MVB12A	-0.603628	23.9723	-1.52944	0.183665	0.374445
PFKP	-0.186139	30.8649	-1.52852	0.183887	0.374707
RAP1B	-0.16742	30.0974	-1.52533	0.184655	0.37608
CDC42	0.138314	30.9436	1.5246	0.184833	0.37625
TXLNA	0.144313	28.8498	1.52385	0.185014	0.376428
SHPK	-0.20569	25.1269	-1.44528	0.217429	0.417922
AP3D1	-0.246587	28.0809	-1.51582	0.186971	0.380023
RNASEH2C	-0.148126	28.961	-1.51267	0.187744	0.381089
DPYSL2	-0.196595	28.2926	-1.51251	0.187782	0.381089
USMG5	-0.186661	28.3372	-1.5118	0.187957	0.381091
ELMO1	-0.127733	30.2064	-1.51174	0.187973	0.381091
GRB2	0.197782	28.6205	1.51052	0.188272	0.381503
RUNX3	0.371815	23.7205	1.43696	0.219633	0.420955
PEX6	0.290084	25.7663	1.43609	0.219865	0.421197
CRLF3	-0.375709	27.4574	-1.5076	0.188992	0.38277
SRSF5	0.270173	28.8609	1.50684	0.189183	0.382808
VDAC3	0.156266	29.4503	1.50642	0.189287	0.382808
RPS25	-0.271755	31.1536	-1.50598	0.189394	0.382808
RING1	-0.264165	25.6918	-1.50494	0.189653	0.382944
ARL3	0.147975	26.6758	1.50365	0.189973	0.383397
TARDBP	0.200917	31.1914	1.50082	0.190677	0.384593
ABCF3	-0.236511	27.7183	-1.50019	0.190835	0.384593
TOP2A	-0.131554	30.6423	-1.50011	0.190854	0.384593
NUP155	-0.156441	29.5996	-1.49769	0.19146	0.385485
NDUFB9	0.397982	26.7566	1.49757	0.19149	0.385485
DDI2	-0.241595	27.9948	-1.49695	0.191645	0.385604
POR	-0.191858	28.9296	-1.49561	0.191982	0.386087
ARHGAP1	-0.206813	28.3058	-1.49474	0.192201	0.386333
NARS	0.12974	30.8699	1.49374	0.192452	0.386501
ZC3H11A	-0.184235	27.7292	-1.49364	0.192477	0.386501
STRBP	-0.197459	27.8103	-1.49263	0.19273	0.386669
SUDS3	-0.600323	24.4291	-1.49254	0.192755	0.386669
MAPK1	-0.178755	29.2781	-1.49155	0.193003	0.38678
FAM120A	-0.136751	28.6473	-1.49031	0.193317	0.387027
FAM129B	-0.193165	26.4508	-1.4903	0.19332	0.387027
OSBPL1A	-0.21578	27.6841	-1.41398	0.225838	0.427279
PHB	0.135055	32.2611	1.48743	0.194046	0.387704
SEC62	-0.311758	27.1614	-1.48583	0.194452	0.387755
ACOT7	0.139085	30.896	1.48568	0.194491	0.387755
PSMB1	0.142236	30.7205	1.48546	0.194545	0.387755
C1orf174	0.473526	25.4848	1.48445	0.194804	0.387896
IMPDH2	0.136303	31.7091	1.48438	0.194821	0.387896
UBXN4	-0.451358	26.7584	-1.48331	0.195094	0.388079
ARID2	0.328931	26.4491	1.48326	0.195107	0.388079
NEK7	-0.142841	25.4174	-1.48251	0.195298	0.388266
ARHGEF2	-0.163061	29.9904	-1.48105	0.195671	0.388814
SLC27A4	0.390239	25.2851	1.40254	0.228989	0.430835
NIP7	-0.214246	26.0622	-1.47623	0.196906	0.390899
GLOD4	0.196153	28.5407	1.47584	0.197006	0.390899
CTPS2	0.198155	26.0804	1.47582	0.197013	0.390899
EIF4G1	-0.133048	31.2427	-1.47514	0.197187	0.391051
ARCN1	-0.139317	30.2098	-1.47162	0.198095	0.392462
ORC2	-0.758398	25.8408	-1.47018	0.19847	0.393009
ACAT1	0.142538	31.3315	1.46889	0.198802	0.393277
USP47	0.242563	26.2861	1.46764	0.199128	0.393729
CISD2	0.283199	27.6713	1.46673	0.199363	0.393998
RAD21	-0.173778	27.7312	-1.4655	0.199686	0.394267
ZNF787	0.326164	27.2586	1.46506	0.199799	0.394274
MDP1	-0.192558	25.3817	-1.4627	0.200416	0.395297
EIF2B5	0.160367	27.6212	1.46163	0.200696	0.395498
SEC22B	0.1788	28.1748	1.46156	0.200715	0.395498
GART	-0.132394	32.3276	-1.45817	0.201605	0.39686
ARF5	-0.268567	27.8472	-1.45742	0.201803	0.397054
EDC3	-0.402618	27.5541	-1.45703	0.201903	0.397057
RALGAPB	0.180033	25.8016	1.3791	0.235586	0.438707
GIT1	-0.217357	28.4871	-1.45504	0.20243	0.39774
FSCN1	0.120696	33.3057	1.45496	0.20245	0.39774
FASN	-0.124138	34.1195	-1.4535	0.202836	0.398303
LPP	0.364848	25.7779	1.377	0.236183	0.439013
ARHGAP25	-0.219045	28.7644	-1.45202	0.203227	0.398698
CYP51A1	0.166544	26.6721	1.45199	0.203236	0.398698
ATXN2L	-0.244831	29.8853	-1.45062	0.203598	0.399212
LXN	-0.628815	26.24	-1.44812	0.204264	0.400321
HTRA2	0.343187	26.001	1.44678	0.204621	0.400824
CHMP4B	0.211742	27.6829	1.44424	0.205301	0.401763
GBF1	-0.177001	26.5887	-1.44216	0.205857	0.402654
YBX1	-0.131577	32.4534	-1.43966	0.20653	0.403772
SART3	0.139234	29.98	1.43916	0.206664	0.403839
PSMB6	0.195219	29.2737	1.43851	0.206837	0.403979
FARSB	0.14127	29.5271	1.43723	0.207183	0.404243
COG3	-0.450178	24.1871	-1.36001	0.241091	0.444202
APRT	-0.128776	31.1767	-1.43696	0.207256	0.404243
LSM14A	-0.213187	27.7377	-1.43652	0.207375	0.404243
WDR43	-0.201186	29.6636	-1.43563	0.207617	0.404243
CRAT	-0.18709	25.3925	-1.43542	0.207673	0.404243
NAGA	0.271478	24.9801	1.43539	0.20768	0.404243
GSK3B	0.166951	27.3192	1.43348	0.208199	0.405056
TRA2B	0.131024	30.7442	1.42915	0.209377	0.406952
ING5	-0.208687	25.1112	-1.42877	0.209478	0.406952
PDLIM1	-0.124388	31.3951	-1.42497	0.210518	0.408411
SUGP2	-0.166903	28.4277	-1.42397	0.210791	0.408411
SDHB	-0.338921	28.3777	-1.42384	0.210828	0.408411
SAFB	0.180642	29.3295	1.42236	0.211235	0.40864
RAB43	-0.279941	27.2589	-1.42224	0.211267	0.40864
SIGMAR1	-0.227114	26.807	-1.34298	0.24611	0.449572
RBPJ	-0.188349	27.2692	-1.4164	0.21288	0.411561
GUSB	0.361266	25.9053	1.41491	0.213292	0.412159
UBR5	0.15096	27.5522	1.41024	0.214589	0.414265
HLA-A	-0.272826	26.7665	-1.40879	0.214997	0.414651
ACAP2	0.198789	27.502	1.40756	0.215339	0.415112
KIF2C	-0.181007	27.9187	-1.40685	0.21554	0.415298
GPHN	0.207414	26.6547	1.40203	0.216893	0.417704
ARRB1	-0.140885	29.2776	-1.40063	0.217286	0.417922
AARSD1	0.139537	28.2391	1.40012	0.217431	0.417922
SRSF6	-0.131376	30.4649	-1.39978	0.217528	0.417922
TDP2	0.163962	26.5047	1.39768	0.218121	0.41886
SDR39U1	-0.216545	24.0492	-1.39709	0.218288	0.418978
ATL2	0.282641	26.7063	1.39365	0.219265	0.420652
PURA	0.125283	27.3536	1.39279	0.219511	0.420923
PPP1R14B	-0.188823	28.365	-1.38919	0.220537	0.422209
MAPRE1	0.150337	30.2234	1.38896	0.220604	0.422209
MLKL	0.248161	26.0951	1.30838	0.256615	0.460709
PPP1R8	0.197153	28.8721	1.38725	0.221094	0.422742
WDR5	-0.122259	29.0791	-1.38649	0.221312	0.422903
HS2ST1	0.394438	25.9596	1.38482	0.221792	0.423268
SMARCB1	-0.261502	28.0162	-1.38412	0.221995	0.423453
BDH1	0.176675	29.5513	1.38274	0.222391	0.424005
GINS4	0.18531	27.135	1.37991	0.22321	0.425123
C12orf10	-0.256112	27.5235	-1.37933	0.223377	0.425123
SEC63	-0.181358	28.607	-1.37925	0.223402	0.425123
PPP1R7	0.152028	27.6477	1.37864	0.223578	0.425255
PHF5A	0.173783	28.8846	1.37775	0.223836	0.425436
MARCKSL1	0.11466	30.3594	1.37456	0.224762	0.426494
CTSZ	0.124153	29.4634	1.37323	0.225151	0.427029
ADAR	0.119675	30.7058	1.37286	0.225259	0.42703
UTP15	-0.249841	27.0533	-1.37128	0.22572	0.427279
DNAJA3	-0.216474	27.98	-1.3711	0.225772	0.427279
HNRNPD	-0.156428	33.3196	-1.37096	0.225813	0.427279
RBM26	0.232032	27.7413	1.37059	0.225924	0.427279
QIL1	0.2071	26.7757	1.28945	0.262543	0.466984
MRPL18	0.3197	24.9086	1.28939	0.262561	0.466984
COX20	-0.196156	27.1913	-1.36957	0.22622	0.427317
RANBP2	0.116175	30.7963	1.36953	0.226232	0.427317
MTFP1	-0.272778	24.1651	-1.36942	0.226265	0.427317
SUN1	-0.264756	25.9178	-1.36758	0.226804	0.428134
CHEK2	-0.479849	25.7023	-1.36629	0.227185	0.428651
ECH1	-0.137904	30.7863	-1.36347	0.228015	0.430009
PDCD4	-0.12262	28.6313	-1.36291	0.228181	0.430009
CLASP1	0.146509	27.9842	1.36275	0.228227	0.430009
ZNF512	0.211773	27.5563	1.36036	0.228935	0.430835
MTAP	0.314342	26.9687	1.36022	0.228978	0.430835
CNOT3	-0.310682	26.3107	-1.35929	0.229253	0.430999
LZTFL1	-0.278448	26.5376	-1.35757	0.229765	0.431527
MRC2	-0.162173	28.4539	-1.35739	0.229816	0.431527
BTK	-0.141866	29.5093	-1.35659	0.230053	0.43162
TRAP1	-0.121753	31.2618	-1.35411	0.230793	0.432601
SNX1	-0.263485	28.342	-1.35322	0.231061	0.432901
MRPS2	-0.219152	27.1637	-1.35016	0.231976	0.434254
HGS	0.154937	27.3029	1.34951	0.232172	0.434254
SEC11A	-0.21971	27.3375	-1.34942	0.232198	0.434254
CHTOP	0.196761	27.8745	1.34936	0.232217	0.434254
ABCB7	0.367166	26.4673	1.34897	0.232332	0.434266
ARHGDIB	0.121205	34.9673	1.34778	0.23269	0.434659
DNAJC2	0.145199	28.9249	1.34755	0.23276	0.434659
HSPA5	0.113791	33.9199	1.34103	0.234728	0.437722
PDK1	0.152862	24.8738	1.33939	0.235227	0.438297
AURKB	-0.388624	25.5747	-1.33929	0.235256	0.438297
C12orf43	-0.150432	26.8816	-1.33696	0.235965	0.439013
BAZ1A	-0.401817	24.4495	-1.33645	0.236122	0.439013
PARP1	-0.125177	32.8759	-1.33623	0.236189	0.439013
POLRMT	0.28127	25.3469	1.33425	0.236795	0.439934
PHB2	0.11879	31.9195	1.33338	0.237059	0.440222
COMT	0.12169	30.4902	1.33296	0.237189	0.440258
EMD	-0.13665	27.6263	-1.33246	0.237341	0.440276
PRKAA1	0.365885	25.1612	1.33221	0.237419	0.440276
ZNF146	0.185458	26.5611	1.33092	0.237814	0.440699
WDR26	0.258127	25.0089	1.3304	0.237973	0.440699
RANBP1	0.130831	32.2347	1.33013	0.238057	0.440699
NCAPH	0.121989	29.8959	1.3294	0.23828	0.440851
RPRD1B	-0.191719	28.768	-1.3285	0.238556	0.441093
LETM1	-0.164652	29.7484	-1.32826	0.238631	0.441093
SEPHS1	-0.126086	29.1946	-1.32777	0.238783	0.44117
TSEN15	-0.220063	25.6047	-1.32362	0.240064	0.44293
DTNBP1	0.257565	24.3969	1.32338	0.240138	0.44293
AKT1	-0.150762	26.3373	-1.32331	0.240161	0.44293
ARFGAP2	0.12761	28.2734	1.32142	0.240744	0.443767
VASP	-0.122878	29.6055	-1.31968	0.241285	0.444355
MARK2	0.28665	25.1887	1.31926	0.241415	0.44439
RNF126	0.13654	27.9707	1.31547	0.242599	0.446166
SRRT	-0.140075	30.6667	-1.31523	0.242673	0.446166
CALR	-0.128027	34.2591	-1.31486	0.242788	0.446166
DDX21	-0.111403	32.6511	-1.31474	0.242826	0.446166
ADCK3	-0.285671	26.5175	-1.31413	0.243016	0.446311
SAP18	-0.146771	28.7982	-1.31315	0.243325	0.44658
DCDC1	0.46993	25.8601	1.31285	0.24342	0.44658
CIB1	0.393521	26.8043	1.3125	0.24353	0.44658
ACSF2	0.196895	28.5467	1.3119	0.243715	0.44658
IMPACT	0.398659	24.1646	1.31114	0.243954	0.446802
GET4	-0.217418	26.9268	-1.30734	0.245152	0.448586
MRE11A	-0.124697	27.9082	-1.30493	0.245914	0.449568
QARS	-0.115119	30.4306	-1.30409	0.246178	0.449572
USP11	-0.166493	27.0077	-1.30386	0.246253	0.449572
TERF2	-0.20303	25.6057	-1.30265	0.246636	0.450067
ROCK1	0.169949	26.4734	1.30207	0.246818	0.450193
CAPZA2	0.137481	28.9797	1.30165	0.246952	0.450231
LEMD2	0.251446	25.6412	1.30084	0.24721	0.450497
ILKAP	-0.493609	26.3005	-1.29933	0.24769	0.451077
APIP	0.222949	26.0413	1.2988	0.24786	0.451077
DSP	-0.424872	27.9765	-1.29878	0.247867	0.451077
MRPS10	0.166732	25.6251	1.29673	0.248521	0.452062
LEMD3	-0.25648	26.6655	-1.29618	0.248695	0.452084
SHMT2	0.112817	31.5072	1.2953	0.248978	0.452084
PTBP3	-0.143072	28.1048	-1.29487	0.249115	0.452084
PIGS	0.277011	27.1192	1.29471	0.249168	0.452084
PREPL	0.337637	25.0197	1.29464	0.249189	0.452084
ATXN10	-0.168916	29.501	-1.29412	0.249354	0.452084
RNF2	0.136054	27.0444	1.29408	0.249368	0.452084
ARFIP1	0.483131	26.129	1.29387	0.249437	0.452084
TOP1	-0.113741	31.3412	-1.29299	0.249718	0.45233
CAD	-0.11476	32.1989	-1.29194	0.250056	0.452574
EIF3A	-0.107809	31.7476	-1.29152	0.250189	0.452574
TUBGCP2	-0.319846	26.0249	-1.29126	0.250274	0.452574
TNKS1BP1	0.422432	23.9097	1.20502	0.290592	0.49733
AP1G2	0.22643	24.0491	1.28973	0.250765	0.453259
SCYL1	-0.254684	26.9606	-1.28683	0.251701	0.454493
IFI16	-0.109448	30.8977	-1.28656	0.251789	0.454493
CDK9	-0.24697	26.757	-1.28486	0.252338	0.455073
ATP5O	-0.13711	30.2407	-1.28345	0.252795	0.455544
GALK1	-0.138549	29.7958	-1.28336	0.252827	0.455544
PDCL3	-0.112751	27.1538	-1.28242	0.253132	0.455888
PEX14	-0.184921	27.2601	-1.27866	0.254354	0.457882
DDX56	0.116656	27.0797	1.27827	0.254482	0.457907
HLA-C	-0.213666	28.5638	-1.27624	0.255147	0.458897
PABPN1	0.132053	30.0999	1.27493	0.255575	0.45946
C19orf43	-0.194863	29.0228	-1.27385	0.255929	0.45989
PABPC1	-0.14768	32.4389	-1.27286	0.256253	0.460265
COQ3	0.256614	24.124	1.18581	0.297354	0.506781
PON2	-0.431027	26.2719	-1.27134	0.256754	0.460752
WARS	-0.125417	30.8547	-1.26889	0.257561	0.46187
PSMC2	0.112577	30.9832	1.26875	0.257608	0.46187
MAP7	0.226296	22.8203	1.26704	0.258171	0.462671
CKAP5	-0.163439	29.7148	-1.265	0.258847	0.463675
VARS	-0.137768	30.9631	-1.26425	0.259097	0.463916
AGPAT1	0.220077	26.4866	1.26339	0.259381	0.464217
MRPS28	-0.304315	25.2339	-1.26266	0.259624	0.464289
SNRNP70	-0.113429	30.6737	-1.26257	0.259654	0.464289
STRIP1	0.182523	25.2432	1.17491	0.301254	0.509736
NDFIP1	-0.387734	23.8541	-1.25773	0.261269	0.466563
HARS2	0.186915	24.7341	1.25771	0.261275	0.466563
CHD4	-0.12536	31.6011	-1.25531	0.262076	0.466984
RBFOX2	0.140769	24.8547	1.25495	0.2622	0.466984
YTHDF3	0.18665	25.5441	1.25451	0.262347	0.466984
MAPKAPK3	-0.34138	28.5445	-1.25377	0.262595	0.466984
B2M	-0.126527	29.7064	-1.25335	0.262737	0.466984
UBLCP1	0.195153	26.9526	1.25332	0.262745	0.466984
MAN2B1	0.112201	29.8519	1.25307	0.262831	0.466984
PDIA3	-0.104919	32.7971	-1.25296	0.262868	0.466984
NUDCD2	0.327847	27.32	1.2529	0.262886	0.466984
GPX4	-0.134281	27.7033	-1.2527	0.262955	0.466984
BLVRB	0.25902	25.4075	1.25236	0.263069	0.466984
DOCK7	-0.247526	25.9001	-1.25213	0.263146	0.466984
TESC	-0.213364	26.6528	-1.25157	0.263335	0.467113
HSP90AB1	-0.125354	35.0824	-1.25024	0.263781	0.467698
SFN	-0.155811	30.6323	-1.24962	0.263991	0.467861
RAB14	-0.116299	30.4981	-1.24684	0.264933	0.468907
MRPL2	-0.178562	26.6755	-1.24604	0.265201	0.468967
DNPH1	0.318358	28.0555	1.24529	0.265456	0.469212
MLST8	-0.2283	26.4209	-1.24352	0.266058	0.470066
AATF	0.209815	27.3125	1.24285	0.266284	0.470258
TXN	-0.125473	31.8285	-1.24055	0.267068	0.470665
ACOT1	0.131821	29.5963	1.24052	0.267079	0.470665
C1QBP	-0.11072	32.5959	-1.24045	0.267103	0.470665
PHLPP1	0.307828	22.9389	1.15025	0.310249	0.516279
NAPA	-0.127101	29.5202	-1.23682	0.268342	0.472642
ACTBL2	0.580016	24.3012	1.23435	0.26919	0.473696
RABL3	0.252603	26.1207	1.23418	0.269249	0.473696
[truncated: 1,543 more rows]

## Sheet: Limma_sd3SN78OE_vs_ctrl RNAseq
SYMBOL	log2FoldChange	logCPM	pvalue	padj
RCC2	-1.22862	8.01833	9.86719e-24	7.11325e-20
THOC3	-1.93753	4.66559	2.48099e-20	8.94274e-17
HMGB2	-1.27531	7.93945	1.67473e-16	4.02437e-13
NDUFB3	-0.92328	7.44152	4.38658e-13	5.27048e-10
RPL23A	-0.803256	10.1558	3.00645e-13	5.27048e-10
TMSB4X	-0.814408	7.66284	4.29118e-13	5.27048e-10
NUDT21	-0.704096	8.34016	3.6018e-12	3.70934e-09
HMCES	-0.911042	6.62006	2.36551e-11	2.13162e-08
NFYA	-0.963531	6.49295	4.08013e-11	3.26818e-08
NCSTN	-1.01204	5.54562	1.03564e-10	7.46593e-08
PPTC7	-1.00973	5.68157	2.21182e-10	1.28503e-07
RPL23AP42	-1.44547	4.31983	2.02042e-10	1.28503e-07
MRPL33	-0.905354	6.45846	2.3173e-10	1.28503e-07
TNPO3	-0.710268	7.19753	2.57991e-10	1.32847e-07
C1orf174	-0.850894	6.11609	5.63821e-10	2.70973e-07
SRP9	-0.643252	7.77505	1.06548e-09	4.80067e-07
MT-ND2	-0.500027	12.0561	1.72148e-09	7.30008e-07
ISCU	-0.964107	6.58597	1.88187e-09	7.5369e-07
SAMD1	-0.724013	7.06416	2.28366e-09	8.66469e-07
EBPL	-0.656187	7.3296	3.03075e-09	1.09243e-06
HNRNPA2B1	-0.54201	10.4221	5.01082e-09	1.72014e-06
MT-ATP8	-0.543568	8.97243	9.34895e-09	3.06348e-06
MNAT1	-1.10262	4.95621	1.10793e-08	3.19483e-06
PABPC1	-0.594408	9.10659	1.0721e-08	3.19483e-06
MTND2P13	-0.882489	5.70819	1.04863e-08	3.19483e-06
ZNF367	-0.898348	5.45456	1.5698e-08	4.35258e-06
HIST1H4C	-0.568991	9.10072	1.77289e-08	4.73362e-06
RNF130	-1.43487	5.46991	2.16333e-08	5.56981e-06
CASP8	-1.15881	5.8221	2.73332e-08	6.79467e-06
APTR	-1.25746	4.45769	4.94739e-08	1.18886e-05
ZDHHC8	-1.38803	4.08354	5.75624e-08	1.3386e-05
TM9SF2	-0.5619	7.73228	7.8983e-08	1.77934e-05
GLMN	-0.893914	5.09011	8.57359e-08	1.87294e-05
PAIP2	-1.0575	6.32028	9.98936e-08	2.11804e-05
MT-ND6	-0.514114	8.89282	1.20051e-07	2.4727e-05
TAF1	-0.704031	6.15941	1.36904e-07	2.7415e-05
SLC25A5	-0.493769	9.31285	1.79135e-07	3.49022e-05
NRN1	-1.13397	5.51391	1.8823e-07	3.57093e-05
KIAA0907	-0.684288	6.34895	2.34694e-07	4.33822e-05
ZNF146	-0.757114	7.03794	2.8698e-07	5.1721e-05
HMGN5	-0.577436	7.9973	3.22938e-07	5.6782e-05
METTL17	-0.668384	6.52795	4.435e-07	7.61236e-05
MDFI	-1.01684	4.74858	6.67535e-07	0.000110156
GNB2	-0.877948	6.17771	6.72337e-07	0.000110156
PLAU	-0.897877	5.46735	7.56283e-07	0.000121156
ACIN1	-0.831772	6.17545	8.26478e-07	0.000127145
SNRPF	-0.491824	9.15321	8.28935e-07	0.000127145
HNRNPH3	-0.527264	8.8896	1.0194e-06	0.000153101
MALAT1	-0.54451	8.69644	1.11427e-06	0.000163934
MT-TP	-0.589647	6.89619	1.42995e-06	0.000206171
MAPK9	-0.787789	5.40218	1.70938e-06	0.000241626
SERINC5	-1.01042	5.73391	1.98768e-06	0.000275561
RPL39	-0.562487	8.42938	2.21305e-06	0.000301016
DTD1	-0.60464	6.78704	2.44352e-06	0.00032621
COMT	-0.497469	7.45983	3.78919e-06	0.000496659
RGP1	-0.965384	4.93181	3.9994e-06	0.000501674
RPS24	-0.389862	12.1383	4.03622e-06	0.000501674
EYA3	-0.590695	6.40046	3.92449e-06	0.000501674
LIX1L	-0.701246	5.86217	4.90205e-06	0.000598964
MT-ND3	-0.373663	12.4225	5.74169e-06	0.000689864
POLR2B	-0.473297	7.64608	6.19281e-06	0.000728656
PALB2	-1.01038	4.57956	6.38051e-06	0.000728656
TXN	-0.578395	8.75241	6.46885e-06	0.000728656
TAGLN2	-0.475273	8.28163	6.40172e-06	0.000728656
CLINT1	-0.55773	6.72942	6.84859e-06	0.000759562
UTP6	-0.668877	6.19205	7.41833e-06	0.000805438
TFB2M	-0.959254	4.50935	7.48569e-06	0.000805438
APEX1	-1.1297	6.85542	8.32192e-06	0.000882246
SRSF4	-0.502824	7.42117	9.44065e-06	0.000986343
NEK7	-0.903653	4.38862	9.79952e-06	0.00100921
ASNSD1	-0.992816	4.77492	1.14498e-05	0.00116256
RAB11FIP3	0.945703	4.44514	1.1815e-05	0.00118298
EIF3E	-0.481596	7.69463	1.25458e-05	0.00123894
RPPH1	-0.4271	10.7464	1.44944e-05	0.00141203
HNRNPF	-0.418782	8.70988	1.50889e-05	0.00145034
NDUFC1	-0.466236	8.31715	1.57065e-05	0.00148985
ACTN4	-0.466801	7.92371	1.73875e-05	0.00162788
ARSB	-0.978625	4.79796	1.88586e-05	0.00167841
TMEM14B	-0.566351	6.78092	1.86347e-05	0.00167841
BUD13	-0.818531	4.90681	1.87946e-05	0.00167841
ELP5	-0.801758	4.69771	1.84185e-05	0.00167841
GAPT	-0.802825	5.98695	1.94896e-05	0.00171342
ATP5H	-0.481764	8.17235	2.17734e-05	0.00189113
CALM2	-0.448545	9.5533	2.40146e-05	0.00206096
RPL30	-0.382244	10.5652	2.55538e-05	0.00216726
PABPC4	-0.540115	8.1192	2.62831e-05	0.0022032
HSP90B1	-0.444597	8.24668	2.75353e-05	0.00227517
TSC22D4	-0.699527	5.06686	2.7773e-05	0.00227517
CYBA	-0.769438	5.1321	3.00891e-05	0.00242192
RPS12	-0.348158	11.6096	3.02363e-05	0.00242192
NUTF2	-0.440411	7.88827	3.50377e-05	0.00276245
RASSF3	-0.75628	6.03222	3.56371e-05	0.00276245
RN7SL1	-0.855552	4.5145	3.53639e-05	0.00276245
PDCD6IP	-0.509882	6.74155	3.81494e-05	0.00292574
BCCIP	-0.437413	7.49838	3.92723e-05	0.00298015
ZC3H7A	-0.652423	5.52698	3.9934e-05	0.00299879
RAF1	-0.660066	5.8241	4.0939e-05	0.00304257
METTL2A	-0.614567	5.77449	4.27735e-05	0.00314647
MYC	-0.490311	7.50736	4.43819e-05	0.00323181
SMARCAD1	-0.546935	6.56513	4.73664e-05	0.00341464
TMEM14C	-0.561679	6.86109	5.51195e-05	0.00393422
NUCKS1	-0.352009	10.3732	5.71252e-05	0.00400545
METTL15	0.66743	5.19874	5.72286e-05	0.00400545
KANSL2	-0.56811	5.96076	5.92376e-05	0.00406709
PSMA5	-0.561521	6.87215	5.87869e-05	0.00406709
C5orf15	-0.565179	6.12541	6.05994e-05	0.00412133
EXOG	0.671139	5.18973	6.17324e-05	0.00415915
TCF20	-0.658079	5.23704	6.30765e-05	0.00417894
TOMM40	-0.472842	7.57871	6.31856e-05	0.00417894
MTATP6P1	-0.57837	8.25068	6.47917e-05	0.00424621
NLRC3	0.633081	5.45598	6.73615e-05	0.00437485
MRPL40	0.540761	6.2809	6.97618e-05	0.00449029
RPIA	-0.48132	7.3851	7.44224e-05	0.00474788
DUSP6	-0.412867	7.67709	7.54376e-05	0.00477043
PRDX4	0.462553	7.17461	7.65973e-05	0.00477939
AFF1	-1.08188	4.79092	7.69051e-05	0.00477939
PPIL3	-0.716783	5.4911	8.10786e-05	0.00499569
APH1A	-0.403664	8.46074	8.82542e-05	0.00539173
PTBP3	-0.411061	7.53925	9.06901e-05	0.00540318
MORC3	-0.834113	4.51449	9.00982e-05	0.00540318
PARPBP	0.532821	6.26989	9.06557e-05	0.00540318
WDR4	0.584315	5.78289	9.17873e-05	0.00542373
ISOC1	-0.497423	6.95935	9.27241e-05	0.00543453
SSB	-0.378278	8.48447	9.45468e-05	0.00549667
TAF4B	-0.767151	4.73611	9.8614e-05	0.00564213
IGFBP7	-0.587508	5.87414	9.7973e-05	0.00564213
PFN1	-0.473244	8.55477	0.000109594	0.00622099
DESI2	-0.468909	6.74378	0.000131012	0.00737862
ABCC1	-0.843364	4.15786	0.000132585	0.00740932
MAGOH	-0.435091	8.14852	0.000134265	0.00744549
CDK7	-0.777024	4.43553	0.000136046	0.00748666
NRARP	-0.648498	5.31178	0.000137813	0.0075265
RYK	-0.613606	5.1998	0.000138893	0.00752842
CHRAC1	-0.473822	6.64217	0.000143162	0.0077019
GNAI1	-0.592135	5.93226	0.000144736	0.0077289
BOLA3	-0.397704	7.68865	0.000147593	0.00782352
MANBA	-0.661551	5.05369	0.000151903	0.00799318
MCM2	-0.393001	7.97284	0.000155013	0.00803592
CD200	-0.545865	6.54653	0.000157756	0.00803592
C1QBP	-0.740744	6.10369	0.000158288	0.00803592
TRAF7	-0.477816	6.5175	0.00015793	0.00803592
DNA2	-0.698024	4.9418	0.000157494	0.00803592
ESF1	-0.470576	6.68193	0.000166604	0.00834568
NOM1	-0.498562	6.22753	0.000166705	0.00834568
MSN	-0.406646	8.23449	0.000174422	0.00863974
UBTD2	-0.497123	6.23564	0.000176174	0.00863974
CDKN2AIPNL	-0.703638	4.8313	0.000176136	0.00863974
SEC31B	0.779617	4.55157	0.00018234	0.0088817
LGALS1	0.473385	6.93417	0.00019138	0.00921674
LEMD3	-0.655046	5.32907	0.000191776	0.00921674
FNDC3B	-0.440333	7.01076	0.00019854	0.00947864
SLC22A16	-0.651077	5.33813	0.00021069	0.00990781
CFAP20	-0.438735	6.97909	0.000215412	0.00990781
LYPLA1	-0.462306	7.5838	0.000214261	0.00990781
RABGGTB	-0.696457	5.79845	0.000217284	0.00990781
IFI16	-0.451574	7.31979	0.000209975	0.00990781
DNAAF5	-0.565562	5.7764	0.000218524	0.00990781
MRPL16	-0.423895	7.17165	0.000217784	0.00990781
TMEM43	-0.779769	5.20996	0.000215636	0.00990781
EIF4G1	-0.378133	8.14103	0.00022161	0.00998493
AHR	-0.836212	4.08196	0.000224894	0.0100699
ZNF106	0.461594	6.6488	0.000233771	0.0103874
PFDN2	-0.421547	7.76201	0.000234865	0.0103874
TAF2	-0.524608	6.14218	0.000236785	0.0104084
UBE2C	-0.377166	7.77602	0.000241145	0.0105359
RCC1	-0.467283	6.88642	0.00024333	0.0105673
FJX1	-0.787303	4.3609	0.000252413	0.0108961
CERS2	-0.767198	5.80363	0.000255109	0.0109469
TSEN15	-0.498946	6.6262	0.000259804	0.0110824
GNAS	-0.481625	9.01851	0.000267356	0.0113375
SEC61B	-0.357168	8.35396	0.000277257	0.0116886
PSMD11	-0.387349	8.39178	0.000299152	0.0125383
PNRC1	-0.378597	7.79134	0.000320094	0.0133385
ARCN1	-0.674217	5.86638	0.000327521	0.013492
LINC00998	-0.462435	6.8443	0.000326138	0.013492
DUS1L	0.404328	7.15037	0.000333747	0.0136704
ERF	-0.595824	5.30566	0.000338886	0.0138024
MED25	-0.656143	4.97121	0.000352562	0.0142483
C16orf87	-0.616036	4.95578	0.000353787	0.0142483
TM7SF3	-0.370844	8.88408	0.000365201	0.0145109
FLAD1	0.460105	6.40285	0.000366345	0.0145109
HSPA1B	-0.47661	6.20704	0.000364052	0.0145109
NUP205	-0.467169	6.54106	0.00037789	0.0148864
OAT	-0.672354	6.58492	0.000381727	0.0149558
YBX1	-0.487962	7.73733	0.000401298	0.0156376
SMIM15	-0.639056	5.66312	0.000406585	0.0157584
PTER	-0.520799	5.96481	0.00042858	0.0164354
MCRIP1	-0.431879	6.66244	0.000428612	0.0164354
SMARCD2	-0.406044	6.91558	0.000434749	0.0165826
DFFB	-0.7574	4.43802	0.000442109	0.0167745
SDHD	-0.783014	4.6379	0.000453936	0.0171331
UBE2B	-0.384386	7.31474	0.000456875	0.0171542
SEP15	-0.41832	7.3512	0.000488967	0.018264
TRIOBP	-0.468292	6.39806	0.000506095	0.0187099
SDHB	-0.363253	7.69891	0.000504793	0.0187099
EEA1	-0.590583	5.20084	0.000522131	0.0192043
GTF2H3	-0.490219	6.35286	0.000534807	0.0195707
UIMC1	-0.652624	4.96322	0.000542047	0.0197354
ANKRD12	-0.421467	6.78223	0.000551963	0.0199955
C16orf91	-0.756807	4.35576	0.000565366	0.0203786
STAT2	0.646172	4.91435	0.00056824	0.0203803
AKT1	-0.571551	5.74182	0.000571249	0.0203868
SWAP70	-0.546611	5.76249	0.000575211	0.0204271
CMC2	-0.467784	6.5441	0.00057864	0.0204481
NARF	0.446306	6.37512	0.000599391	0.0210328
WDR6	0.423957	6.68534	0.000601019	0.0210328
PCBP1	-0.356004	8.81751	0.000614941	0.021416
MEST	-0.4664	7.11645	0.000624235	0.0216126
SUCLG2	-0.678176	4.50008	0.000629323	0.0216126
ALYREF	-0.343911	8.32775	0.000629579	0.0216126
MT-CO3	-0.276848	13.1601	0.000634619	0.0216823
NUDT15	-0.514853	5.89955	0.000645541	0.0219514
MYL12B	-0.364105	8.11925	0.000659274	0.0223132
HMGB1	-0.317966	9.43143	0.000663951	0.0223665
SRPRA	-0.4653	6.14008	0.000668141	0.0224029
CDC5L	-0.480047	6.56927	0.000696013	0.0232294
TRRAP	-0.759271	4.77856	0.000701617	0.0233086
MT-TY	-0.524498	5.56931	0.000716245	0.0236854
SMARCA4	0.340897	7.97534	0.000741809	0.0243283
ENSA	-0.471742	7.52529	0.000742436	0.0243283
CTSC	-0.474785	7.65213	0.000749155	0.0244374
SEC61G	-0.492471	7.89494	0.000756006	0.0245498
LAMTOR3	-0.610809	5.04814	0.000768821	0.024854
TIMP1	0.470875	6.05613	0.000775146	0.0249465
CHST14	-0.649292	4.7064	0.000779723	0.0249823
RPS23	-0.316333	10.4205	0.000831232	0.026494
MT-ND4	-0.272049	12.9465	0.000834255	0.026494
FBXO46	-0.661148	4.6494	0.000851803	0.026815
PFDN6	-0.519827	5.51367	0.000849649	0.026815
MGAT5	0.598886	5.35394	0.000860038	0.0269566
DNAAF2	-0.529653	5.41832	0.000900267	0.0280953
BMS1	-0.347296	7.59802	0.000947795	0.0294511
SDCBP	-0.368355	7.37399	0.000953532	0.0295022
NUP37	-0.441089	6.275	0.000985523	0.0303617
RBM17	-0.353107	8.20555	0.00101813	0.0312328
ACTB	-0.419204	9.22997	0.00102691	0.0313456
CDK5RAP1	0.539846	5.47069	0.00104332	0.0313456
SUGP1	0.580303	5.03558	0.00103171	0.0313456
EIF2D	-0.463339	5.91857	0.00104355	0.0313456
CDK5	-0.685026	4.55769	0.00104096	0.0313456
LRFN4	-0.721578	4.19889	0.00106562	0.0318758
VPS41	0.582928	5.00552	0.00107821	0.0321192
CPT1A	0.362272	7.22172	0.00108773	0.0322693
TRIT1	-0.529504	5.39173	0.00110065	0.0325187
LIG1	-0.460169	5.95184	0.00112408	0.0330057
MT-ATP6	-0.268933	12.3347	0.00112781	0.0330057
PRRC2A	-0.587155	5.0561	0.00113086	0.0330057
MUS81	-0.662624	5.24553	0.0011481	0.0333735
COPS7A	-0.590778	5.09266	0.00118921	0.0344298
TRAM1	-0.52917	5.49061	0.00121564	0.0350542
TRAPPC3	0.423148	6.75354	0.0012755	0.03564
TRIP13	-0.402491	6.70602	0.001243	0.03564
NUDC	-0.383897	7.31111	0.00125634	0.03564
TFAM	-0.33898	7.63422	0.00127243	0.03564
RNF146	-0.542935	5.03745	0.00126459	0.03564
ZCCHC14	-0.634477	4.54765	0.00127434	0.03564
NSMCE2	0.462272	6.17596	0.00125357	0.03564
IGF2R	-0.662189	4.8302	0.00126352	0.03564
DCAF1	-0.595635	5.52797	0.00129772	0.0358044
ABT1	-0.391553	6.746	0.00128819	0.0358044
FIBP	0.427233	6.36253	0.00130126	0.0358044
DHX16	-0.64878	4.48449	0.00129512	0.0358044
CCDC134	0.554743	5.08152	0.00132241	0.0362481
USP19	-0.715716	4.65875	0.00138798	0.0379013
LEO1	-0.482951	6.13629	0.00144743	0.0393755
EEF1A1	-0.672953	6.15866	0.00147749	0.0400422
CLDND1	-0.505912	5.72543	0.00149732	0.0404277
PTPRE	0.488801	5.66667	0.00150633	0.0405191
EMC3	0.436086	6.12845	0.00151619	0.0406264
MAP2K1	-0.514131	5.2553	0.00152159	0.0406264
ERLIN1	-0.401014	6.97954	0.00154568	0.0411173
TCOF1	-0.356235	7.3563	0.00155742	0.0411261
SENP1	-0.483431	5.54664	0.00155483	0.0411261
SYNGR2	-0.324985	8.03141	0.00157254	0.0413453
TPP1	0.47393	5.76352	0.00157719	0.0413453
CCDC28A	-0.671817	4.58079	0.00160507	0.0413487
DHRS7	-0.619166	5.12691	0.00160587	0.0413487
NDUFV3	0.428953	6.92311	0.001606	0.0413487
FES	0.687688	4.27902	0.00159494	0.0413487
TWF2	-0.474692	6.10308	0.00158834	0.0413487
KMT2A	-0.391071	6.63045	0.00163414	0.0417749
SLC5A6	0.40935	6.78314	0.00163196	0.0417749
METTL5	-0.323529	7.87152	0.00167024	0.0425468
LYPLAL1	-0.618367	4.58664	0.00167963	0.0426355
APBB1IP	0.389501	7.02325	0.0016906	0.0427633
TSSC4	-0.518271	5.30967	0.00171611	0.0432568
STARD7	0.305734	8.57454	0.00172575	0.0433482
NSUN2	-0.375104	7.07055	0.00173615	0.0433615
NMI	-0.552842	5.69527	0.00173831	0.0433615
DUSP7	-0.457146	5.72214	0.00174888	0.0434747
FBXO42	0.623288	4.57324	0.00176182	0.0436459
LIN54	-0.602798	4.90679	0.00179442	0.0443013
PSMA3	-0.32264	8.30559	0.00180172	0.0443296
HDAC2	-0.318834	8.50832	0.00180866	0.044349
RPS25	-0.379872	9.61404	0.00183171	0.0447621
CSNK1G2	-0.41308	6.69123	0.00186152	0.0453368
OST4	-0.346481	8.28744	0.00187247	0.0454499
EIF3F	0.387645	6.59741	0.0019203	0.0464546
DRAP1	-0.494361	5.61749	0.00193337	0.0466142
PRPF8	-0.445902	6.15311	0.00194391	0.046712
MRPS15	-0.380659	7.34949	0.00196378	0.0470163
TTC5	-0.61641	4.47679	0.00196961	0.0470163
EEF1E1	-0.274203	9.8113	0.00199559	0.0474793
TMEM87A	-0.387299	6.59584	0.00204745	0.0485529
FOXRED2	0.402368	6.72215	0.00206569	0.0488248
H2AFZ	-0.267353	10.489	0.0020932	0.0493133
B3GNT2	-0.39147	6.43958	0.00211563	0.049518
TRABD	0.509901	5.6008	0.00211134	0.049518
GPN3	-0.437216	6.16322	0.00212832	0.049654
FABP5	-0.694692	4.21052	0.00217154	0.0504989
MT-CYB	-0.252212	12.2629	0.00218106	0.050557
EWSR1	-0.319506	7.77777	0.00220833	0.0510253
POLR2E	-0.304244	8.50748	0.00223746	0.051533
RBM3	-0.307353	7.98335	0.00227853	0.0523118
NOC3L	-0.472206	5.6011	0.00229023	0.0524135
GPR85	0.442998	6.12405	0.00231898	0.0529036
RP11-253E3.3	0.530271	5.09531	0.0023547	0.0535489
UPF3A	-0.514471	5.10274	0.00237129	0.0537567
KIAA0368	-0.432786	5.95244	0.00241618	0.0546026
ATIC	0.392379	6.5427	0.00245358	0.0552317
BLOC1S2	-0.380294	6.47033	0.00245934	0.0552317
NUDT8	0.390443	6.62384	0.00246826	0.05526
TSC2	0.505664	5.23309	0.00249448	0.055674
ACADVL	0.465514	5.67464	0.00253616	0.0564296
RUBCN	0.516016	5.20353	0.00256542	0.0567305
THAP7	0.509408	5.17053	0.00255967	0.0567305
MANBAL	0.596182	4.57583	0.00258413	0.0569694
COMMD9	0.502416	5.19899	0.00261899	0.0570477
TRIM32	0.583101	4.77687	0.00261933	0.0570477
RPL41	-0.438146	7.7023	0.00261153	0.0570477
GTF2H5	-0.433519	6.25275	0.00261664	0.0570477
VKORC1	0.44623	5.89897	0.00263411	0.0571966
POLR2I	0.373888	7.08598	0.00271252	0.0583719
ABHD3	-0.60468	4.97154	0.00270526	0.0583719
PPIB	-0.898974	4.68432	0.00270414	0.0583719
RP4-758J18.2	0.515742	5.22534	0.00273269	0.0586308
RNASEH2B	-0.333966	7.54583	0.00276016	0.0590444
MORC2	-0.586239	4.63562	0.00277559	0.059199
MTA1	-0.326589	7.38953	0.00283429	0.0602725
B2M	-0.264656	10.0784	0.00284773	0.0603802
GSE1	-0.560215	4.97986	0.0029667	0.0624695
WDCP	0.562531	4.84055	0.00297226	0.0624695
FUNDC2	0.598692	4.58137	0.00296092	0.0624695
TBC1D31	-0.561104	4.67674	0.00307926	0.0645303
SEPT9	0.329688	7.34804	0.00309123	0.0645933
SNX3	-0.4518	7.20325	0.00311133	0.0648254
CAPZB	-0.309247	8.11434	0.00318162	0.0660989
PDIA4	-0.401451	6.89458	0.00321138	0.0665254
WDR90	0.472938	5.64051	0.00324633	0.0670568
GADD45A	-0.456012	6.30444	0.00325703	0.0670855
DUT	-0.285567	9.22489	0.00329332	0.0675598
TANC2	0.65054	4.5049	0.0032988	0.0675598
PIAS1	-0.385896	6.30578	0.00332756	0.0679558
TUBA1B	-0.246406	11.5562	0.00337107	0.0686497
SLA2	-0.642826	4.22072	0.00341653	0.068991
PAX8-AS1	0.47818	5.32137	0.00341281	0.068991
RPS29	-0.244288	11.6375	0.00341376	0.068991
SH3BP1	0.578637	4.94143	0.00343658	0.069202
ETHE1	0.361587	6.66639	0.00344733	0.0692251
ACAT1	-0.398306	6.59392	0.00357763	0.0716421
PAFAH1B1	0.377836	6.50531	0.0035895	0.0716806
ZNF22	-0.321486	7.21258	0.00365885	0.0728637
MT-TL1	-0.318248	8.85939	0.00369332	0.0733475
ATOX1	0.351911	6.77536	0.00371862	0.073647
URGCP	0.559984	4.70204	0.0037348	0.0737648
RPL27A	-0.250159	11.2044	0.00376698	0.0741972
TPM3	-0.337362	7.79965	0.00380852	0.0746293
SF3B5	-0.285049	8.68069	0.00380962	0.0746293
MRPL21	0.30615	7.77995	0.00384053	0.074866
CDC42SE1	-0.354586	6.6723	0.00384248	0.074866
THUMPD2	-0.617774	4.55146	0.003875	0.0752962
UNC50	-0.470391	5.35397	0.00389973	0.075573
PEBP1	-0.261837	10.1866	0.00395762	0.075889
OAZ1	-0.31757	9.14804	0.00395779	0.075889
FGFR1OP2	-0.38181	6.52574	0.00395815	0.075889
SYMPK	-0.4266	5.87792	0.00394759	0.075889
MAPKAPK3	0.318883	7.25778	0.00398075	0.0759185
MRPL9	0.318745	7.30721	0.00397649	0.0759185
ZNF428	-0.293932	8.18317	0.00400239	0.0761299
LMAN1	-0.27423	8.63756	0.00404819	0.0766574
RBM15	0.421367	6.1979	0.00405139	0.0766574
SELK	-0.349131	6.77441	0.00408686	0.0771261
ASF1A	-0.442806	6.11644	0.00419171	0.078705
RAP1A	-0.303165	7.61602	0.00419789	0.078705
TMCO3	-0.484135	5.09967	0.00420328	0.078705
KIAA1211	0.492495	5.10328	0.0042215	0.0788415
PDCD2L	-0.517174	5.25876	0.00424721	0.079009
SSFA2	-0.567011	4.90409	0.00425239	0.079009
TMC6	0.398929	6.16986	0.00430269	0.079738
ATP13A3	-0.394457	6.30325	0.00431773	0.0798116
REV3L	-0.446306	5.38969	0.00433275	0.0798844
COX17	-0.296415	7.67868	0.00438443	0.080631
CHEK1	-0.359893	7.04193	0.00442442	0.0811594
GATS	0.578296	4.65262	0.00446372	0.0816724
EIF4A3	-0.271204	8.78673	0.00448025	0.0817675
TUFM	0.284359	8.62763	0.00449961	0.0819133
SLC38A10	0.360818	6.78282	0.00452532	0.0821739
PSMG3	0.369826	6.9729	0.00453816	0.0821999
SUMO2	-0.367045	7.10052	0.00458742	0.0827653
SNORD104	0.488286	5.15092	0.00460381	0.0827653
MEX3A	-0.320908	7.12419	0.00459549	0.0827653
CHMP5	-0.357198	6.6574	0.00480737	0.085867
SRRM1	-0.295232	8.30487	0.0048359	0.085867
FAM21C	0.612111	4.28691	0.00481406	0.085867
RPS26	-0.329469	7.77251	0.00482782	0.085867
	0.463216	5.67573	0.00481155	0.085867
SLC7A5	-0.340322	6.71337	0.00487596	0.0863656
PNKP	0.557212	4.76878	0.00488875	0.0863799
TAF1C	0.379757	6.55444	0.00493599	0.0870014
ANPEP	0.362096	6.75006	0.00496041	0.0872185
SMC4	-0.269998	8.74913	0.00499159	0.0875532
PTMA	-0.265617	9.48478	0.00502283	0.0878873
SRPK2	0.310987	7.48227	0.00509639	0.0889585
MRPL47	-0.314597	7.16342	0.0051431	0.0894286
ABI2	0.378917	6.61183	0.00517294	0.0894286
QARS	0.311766	7.30143	0.0051672	0.0894286
TOP1	-0.316983	7.32452	0.00515591	0.0894286
UTP4	0.312501	7.31534	0.00520823	0.0898233
SLC25A26	0.386055	6.29553	0.00524177	0.0899713
MB21D1	-0.598504	5.62911	0.0052353	0.0899713
PARG	-0.539963	4.65723	0.0053411	0.0914585
COMMD3	0.309431	7.77963	0.00544644	0.0930412
GLE1	-0.347066	6.62242	0.00548852	0.0935383
MPDU1	-0.433594	5.56742	0.00550771	0.0936441
MDM4	0.368495	6.2893	0.00553304	0.0938534
SOGA1	0.61161	4.35772	0.00556306	0.0941411
COX10	0.594784	4.37854	0.00566239	0.0948364
FAM206A	-0.585552	4.23893	0.00562539	0.0948364
TNFRSF10B	0.589435	4.42517	0.00565876	0.0948364
GTF2A1	-0.411965	6.20762	0.00566993	0.0948364
PRDX3	-0.266578	8.61528	0.00565634	0.0948364
ZNF318	0.513369	4.86257	0.00572045	0.09546
PET100	0.505416	4.86494	0.00574921	0.0957183
TMEM123	-0.304383	7.80475	0.00577055	0.0957899
TMA7	-0.362875	7.77459	0.00578008	0.0957899
MRPL44	-0.44986	5.31128	0.005808	0.0958121
CHD9	-0.28666	7.75196	0.00580323	0.0958121
RABGGTA	0.55711	4.52775	0.00592739	0.0971658
SMARCC2	0.339361	6.89281	0.0059305	0.0971658
TOR3A	-0.414468	5.55726	0.00592517	0.0971658
APOBEC3C	0.321117	7.04438	0.005951	0.0972806
MAST2	0.523946	4.6828	0.00600272	0.097683
ATL2	-0.431873	5.92252	0.00599799	0.097683
ELF1	-0.41429	5.7804	0.00604184	0.0980983
PAXBP1	-0.552446	5.096	0.00607779	0.0984602
KIAA2013	-0.348923	6.6233	0.00610423	0.0986668
SUPT16H	-0.279349	8.1562	0.00614036	0.0990288
RARS2	0.406907	6.09717	0.00615451	0.0990354
RPL34	-0.264982	10.7595	0.00636398	0.102007
DNAJC7	-0.322695	7.12877	0.00638161	0.102007
XPO6	0.395151	5.90936	0.00637458	0.102007
TAB2	-0.42329	5.38299	0.0066018	0.105293
AARS	0.360484	6.4452	0.0066225	0.10539
NUP93	-0.284753	7.6439	0.00665878	0.105734
GORASP2	0.330061	6.99552	0.00675889	0.107088
CHD4	-0.342123	7.08507	0.0068652	0.108533
NRBP1	-0.447122	5.76049	0.00690682	0.108953
GRWD1	0.355284	6.43969	0.00694281	0.10907
TMEM11	-0.401907	5.69799	0.00694456	0.10907
C19orf60	0.394327	6.1234	0.00699065	0.109556
TEX261	0.384489	6.20302	0.00709965	0.110613
PXYLP1	-0.448201	5.08752	0.00707662	0.110613
MRPL13	-0.333789	6.95086	0.00710412	0.110613
ERH	-0.249758	9.77465	0.00737106	0.114522
MAZ	-0.457657	5.82413	0.00742887	0.115171
KDM3A	-0.403384	5.86969	0.00769354	0.117885
PQLC1	0.462348	5.00131	0.00767733	0.117885
PCNX4	-0.370678	6.4814	0.00767283	0.117885
NUF2	-0.373528	5.95542	0.00768356	0.117885
MRPL57	0.330324	6.69972	0.00770199	0.117885
UBA52	0.235977	10.3526	0.0076359	0.117885
JKAMP	-0.475552	5.57685	0.00782906	0.119323
GPATCH2	-0.560493	4.39633	0.00782835	0.119323
MRPL32	-0.499182	5.75915	0.00790923	0.120284
TYW5	0.444143	5.25444	0.00792552	0.120284
RPLP1	-0.22254	11.5431	0.00811308	0.122872
SRP14	-0.254619	9.25337	0.00813639	0.122967
HNRNPL	-0.27436	7.74262	0.00817694	0.123064
DAG1	0.538036	4.46354	0.00816704	0.123064
MT-RNR2	-0.216565	13.4481	0.00821063	0.123313
KIAA1524	-0.413845	5.33106	0.00823904	0.123483
TM7SF2	0.525738	4.63809	0.00826676	0.123641
GRINA	0.397365	5.70638	0.00831253	0.124068
CLK2	0.336824	6.66326	0.00833265	0.124112
AHSA1	-0.270096	8.60063	0.00835621	0.124206
PSMC3IP	-0.523685	4.68944	0.00846406	0.125292
SNHG9	0.387894	5.84497	0.00846286	0.125292
MLC1	0.313927	7.06632	0.00851071	0.125725
GALNT7	-0.354007	6.20677	0.00863039	0.126765
DEPDC7	-0.534456	4.60761	0.00860096	0.126765
PYCR2	-0.287107	7.44722	0.00865319	0.126765
ASXL2	0.500928	5.11402	0.00873937	0.126765
TET2	-0.430267	5.20607	0.00870798	0.126765
USF3	-0.422321	5.76731	0.00872245	0.126765
MRFAP1	0.253095	8.70728	0.00864048	0.126765
RNPS1	-0.334992	6.49398	0.00869348	0.126765
HACD2	0.384815	6.0091	0.00869172	0.126765
ATP6V1B2	-0.335403	6.78364	0.00881557	0.127613
PRMT5	0.30612	7.17096	0.00900972	0.127696
CLDN15	0.507113	4.89701	0.00902473	0.127696
CHCHD3	-0.480029	6.36941	0.00891976	0.127696
BCL7B	-0.360819	6.11003	0.00899785	0.127696
NOL11	-0.261088	8.1037	0.00900362	0.127696
RAC1	0.273473	9.26843	0.0089199	0.127696
IPMK	-0.439851	5.15177	0.00885125	0.127696
ZMYND19	0.337041	6.53049	0.00890571	0.127696
C11orf84	-0.455838	5.73893	0.00896695	0.127696
MEX3C	-0.313711	6.79964	0.00896505	0.127696
SVBP	-0.546644	4.45179	0.00903385	0.127696
PURA	-0.299006	7.07813	0.00894672	0.127696
TMEM258	0.259314	8.81715	0.00906678	0.127911
DEPDC1B	-0.319986	7.05431	0.00911569	0.12835
SACM1L	0.319885	6.86532	0.00918845	0.129122
SDHA	0.355355	6.58479	0.00935446	0.131001
APP	-0.253786	8.49879	0.0093585	0.131001
FANCA	0.362487	6.0426	0.00937779	0.131016
KANSL1	-0.436507	5.68587	0.00940454	0.131136
UCHL3	0.329991	6.50924	0.00950506	0.132027
MYO15B	0.582828	4.42721	0.00949147	0.132027
DCK	-0.404968	5.64059	0.00958154	0.132578
RPS9	-0.285388	8.98776	0.00956524	0.132578
MPHOSPH10	-0.312678	6.97764	0.00962504	0.132925
KIT	-0.238899	9.1484	0.00965376	0.133067
NCOA5	-0.500742	4.66297	0.0097106	0.133509
NUDCD2	-0.303634	6.87597	0.00972287	0.133509
ACTR5	-0.562458	4.19068	0.00984188	0.134375
RAI1	0.399637	5.51314	0.00980714	0.134375
PPP3R1	-0.290313	7.41891	0.00982748	0.134375
TGOLN2	0.268031	7.70258	0.00988508	0.134459
C12orf43	0.379217	5.75652	0.00990394	0.134459
GPANK1	0.390634	5.79429	0.00989416	0.134459
CHPT1	-0.32119	7.59575	0.0099256	0.134499
C11orf58	-0.292213	7.93114	0.010013	0.134671
JUND	-0.326982	6.70901	0.01001	0.134671
ADAM15	-0.497674	4.9098	0.00997749	0.134671
ADA	0.359623	6.30515	0.00995857	0.134671
DUSP23	0.391397	5.72747	0.0101477	0.135723
RPN1	-0.346189	7.16534	0.0101455	0.135723
C14orf80	-0.533581	4.37111	0.0101403	0.135723
ESD	-0.250323	8.4526	0.0101807	0.135913
CLSTN1	0.290615	7.32723	0.0102594	0.13671
ELMO1	-0.43264	5.41492	0.0102999	0.136997
DHRS9	0.382228	5.7181	0.0104042	0.137995
RNF40	0.408334	5.48085	0.0105281	0.137995
CENPA	-0.446372	5.25018	0.0104313	0.137995
EPT1	-0.479619	5.11312	0.0104744	0.137995
TARS2	-0.549483	4.26746	0.0105233	0.137995
NUDT22	0.489096	4.88749	0.0104791	0.137995
PUS1	0.363121	5.92177	0.0104573	0.137995
EDC3	0.481676	4.82329	0.0105213	0.137995
CREG1	-0.508086	4.80178	0.0106155	0.138887
DDX11	0.54563	4.37936	0.0108642	0.141884
NEDD1	-0.360623	5.90414	0.0109556	0.14282
USP4	0.342306	6.16866	0.0110702	0.142931
SLC43A3	-0.275366	7.63358	0.0110199	0.142931
EBAG9	-0.375786	5.8105	0.0110832	0.142931
SNF8	-0.272793	7.40057	0.0110376	0.142931
ARHGAP1	0.443579	5.40447	0.0110657	0.142931
SHMT2	0.315647	6.67981	0.0110345	0.142931
MRC2	0.388706	5.81607	0.011107	0.142983
FAM155B	0.470905	4.76209	0.0112023	0.143953
RBCK1	0.35943	6.1555	0.0112315	0.144071
ERAL1	-0.445083	5.12439	0.011277	0.144397
HMGN1	-0.245474	8.60954	0.0113236	0.144737
CD33	0.362009	6.18001	0.0114134	0.145627
MRPS23	0.302648	7.03417	0.0114903	0.14635
ZNF574	0.473416	4.7794	0.0115358	0.146669
CABIN1	0.396545	5.73488	0.0116281	0.146807
TKT	-0.266057	8.73671	0.011602	0.146807
TSC22D2	0.472994	4.81447	0.0116002	0.146807
RPF2	-0.291125	7.18421	0.011626	0.146807
BAG3	-0.390364	5.59867	0.0117423	0.147648
MOCS2	-0.464859	4.87697	0.0117561	0.147648
MORF4L1	-0.245848	8.7119	0.0117561	0.147648
MYO1G	0.427312	5.07831	0.0118081	0.148042
ZBTB17	0.497162	4.57532	0.0120269	0.148463
CAPNS1	0.275932	7.57286	0.0119866	0.148463
RNF157	0.378593	5.84885	0.0119451	0.148463
PCYOX1L	0.476457	5.05145	0.0118854	0.148463
DGKZ	-0.334831	6.72278	0.0118979	0.148463
INCENP	0.432829	5.17997	0.0120141	0.148463
INPP5D	0.267032	7.958	0.0120009	0.148463
ARL16	-0.636	4.59649	0.0119296	0.148463
LINC01128	0.521764	4.41742	0.0119729	0.148463
KDM5C	-0.411963	5.75025	0.012079	0.148596
TOR1AIP1	-0.338714	6.47741	0.0120716	0.148596
PRELID3B	-0.314605	6.86975	0.0121915	0.149725
TTI1	0.350641	6.11379	0.0122645	0.15011
ATPIF1	0.254229	8.65312	0.0122561	0.15011
SLC39A14	-0.364725	6.2864	0.0123005	0.150296
PALM2-AKAP2	-0.254723	8.38526	0.0123511	0.150659
REXO2	0.307637	6.83231	0.0124549	0.150903
TXNDC15	0.346903	6.02325	0.0124222	0.150903
MANF	-0.299342	6.86672	0.0124275	0.150903
EVI2B	-0.416334	5.47011	0.0124418	0.150903
DYNLT3	-0.518633	4.52741	0.0125	0.151196
NUBPL	-0.434516	5.04674	0.0125225	0.151214
TOB1	-0.370463	5.63573	0.0125913	0.151791
ZBTB7A	-0.305692	6.94118	0.0126201	0.151883
TK1	-0.32338	6.95429	0.0126422	0.151896
ZNF207	0.243884	8.42348	0.0126794	0.151904
NONO	-0.249073	8.80637	0.0127021	0.151904
ATP5G3	-0.219606	10.2471	0.0127061	0.151904
PCNA	-0.252236	9.04255	0.0127511	0.15219
SCFD1	-0.327417	6.35943	0.0127743	0.152215
ZNF627	0.487033	4.73894	0.0128274	0.152596
RPRD1A	0.380698	5.95843	0.0129338	0.153232
FAM134A	0.467793	4.87245	0.0129593	0.153232
R3HDM2	-0.444427	5.0545	0.0129659	0.153232
IL1RAP	-0.361548	6.67763	0.0129304	0.153232
MAPRE1	-0.425627	6.6548	0.0130115	0.153268
DCTN1	0.333024	6.40343	0.0129932	0.153268
CAPN15	0.376991	5.65289	0.0130583	0.153462
ENTPD1-AS1	-0.451178	4.74639	0.0130706	0.153462
H2AFY	-0.269825	8.89422	0.0131102	0.153523
HIF1AN	0.335493	6.20578	0.0131183	0.153523
NFE2L2	-0.415349	5.98673	0.0132504	0.154567
KCTD7	0.535546	4.56264	0.0132313	0.154567
C21orf59	-0.35455	5.97674	0.01328	0.154662
GLIPR1	-0.519567	4.48915	0.0135013	0.156869
AMFR	-0.388494	5.37574	0.013513	0.156869
MBOAT7	0.295312	6.88031	0.0135803	0.156891
LIN9	-0.48799	4.76705	0.0135369	0.156891
LCMT1	0.407352	5.66728	0.0135648	0.156891
ELK3	0.360701	6.03614	0.0136328	0.157075
MRPS22	-0.299415	6.7963	0.0136397	0.157075
RFX1	0.530301	4.4226	0.0138347	0.159066
ZNF76	-0.509499	4.52266	0.0140707	0.161522
PRDM2	-0.461432	4.83017	0.0141775	0.162489
SPI1	-0.449921	4.7776	0.0142257	0.162524
ADGRL1	-0.343029	6.01932	0.0142162	0.162524
NAA25	0.323023	6.26851	0.0143416	0.162861
CEP55	-0.499324	4.42705	0.0143455	0.162861
MRPL49	-0.366821	5.93837	0.0142835	0.162861
NHLRC2	0.411433	5.06954	0.0143111	0.162861
CETN3	-0.270405	7.3811	0.0143883	0.16309
SPEN	0.330065	6.42805	0.0144554	0.163337
CKAP4	-0.462852	5.46192	0.0144363	0.163337
LETMD1	0.519994	4.41084	0.0145379	0.163671
CDKN2AIP	-0.34278	6.01253	0.0145308	0.163671
LMAN2	-0.254802	7.66769	0.0145531	0.163671
ASCC2	-0.381721	5.80717	0.0146085	0.164038
ELAVL1	-0.247752	7.91143	0.0146384	0.164118
TPI1	0.223103	9.36504	0.0148022	0.165697
SLTM	-0.256849	7.73728	0.0148373	0.165833
CHUK	-0.476673	4.98011	0.0150178	0.167591
ACSL4	-0.372173	5.82822	0.0151473	0.167661
PHF10	-0.272066	7.32305	0.0150602	0.167661
SFXN4	-0.299453	6.91708	0.0150952	0.167661
TMEM50A	-0.294113	6.76899	0.0151518	0.167661
MT-ND1	-0.208415	11.5682	0.0151095	0.167661
POLG2	-0.391237	5.26027	0.0151637	0.167661
POLE2	-0.49809	5.03609	0.015273	0.168611
NVL	-0.483896	4.78944	0.0154162	0.169932
SNRNP70	-0.272532	7.69357	0.0154586	0.169993
FBXO5	-0.406633	5.76868	0.0154689	0.169993
WBSCR22	-0.271582	7.98696	0.015582	0.170325
PDCD7	-0.318963	6.24413	0.0155778	0.170325
GEMIN7	0.461678	4.82394	0.015603	0.170325
UHMK1	-0.343839	6.11069	0.0155747	0.170325
AP1S2	0.390029	5.56692	0.0156173	0.170325
FBXL17	0.445128	5.09169	0.0157399	0.171403
CHST11	-0.285391	6.86645	0.0158008	0.171806
ZDHHC7	0.296018	6.86929	0.0159181	0.172822
EVL	0.328033	6.25136	0.0159598	0.173014
SCPEP1	-0.383901	5.62683	0.0160645	0.173466
TMED9	-0.233748	8.48602	0.0160737	0.173466
MT1X	-0.317882	6.27631	0.0160437	0.173466
MSRB1	0.359977	5.77283	0.0161011	0.173502
DPM1	-0.37474	6.47772	0.0163488	0.173927
COASY	0.360239	5.80005	0.0162776	0.173927
UPRT	-0.490832	4.5694	0.0163475	0.173927
HNRNPM	-0.238246	8.99006	0.0163257	0.173927
FBXO18	-0.521604	4.73135	0.0163329	0.173927
EFCAB14	-0.295617	6.64997	0.0162858	0.173927
COG1	0.41105	5.15564	0.0163576	0.173927
TRAPPC4	0.269298	7.58641	0.016261	0.173927
FGD5-AS1	-0.295321	6.97045	0.016226	0.173927
HSP90AA1	-0.201379	12.9562	0.016392	0.174035
CCDC34	-0.268368	7.25637	0.0164672	0.174169
FAM60A	-0.37957	5.41015	0.016477	0.174169
RP11-132A1.4	-0.381582	5.84253	0.0164292	0.174169
PSMG1	-0.263218	7.65737	0.0165624	0.174304
MT-CO1	-0.24013	11.2175	0.0165543	0.174304
RP11-473M20.9	0.511916	4.52966	0.0165526	0.174304
PSMC6	-0.293781	6.79537	0.01674	0.175916
EBLN3P	-0.350555	6.12121	0.0168041	0.176333
PDRG1	0.342843	6.02211	0.0168302	0.17635
LRIG2	-0.512843	4.26064	0.0168663	0.176472
PFKP	0.28949	6.83964	0.016979	0.176897
NDUFA8	0.32217	6.62259	0.0169805	0.176897
UQCRB	-0.244841	8.26408	0.0169793	0.176897
DBF4	-0.375919	5.60055	0.0170843	0.177721
SNW1	0.279685	7.06522	0.0173654	0.179912
SCP2	-0.274975	7.18425	0.0173266	0.179912
RHOQ	0.291533	6.64099	0.0173698	0.179912
NMD3	0.30963	6.34371	0.0175217	0.181225
DLEU2	-0.303837	6.43103	0.0176402	0.182189
MFN1	-0.412847	4.95727	0.0177263	0.182817
RETSAT	0.389295	5.4588	0.0178941	0.184021
FBRS	0.41528	5.26523	0.0178775	0.184021
TAF9	0.254023	7.7886	0.0180375	0.185231
SLC39A8	-0.299301	6.71837	0.0182135	0.186676
BANP	0.495796	4.75939	0.0182559	0.186676
RUVBL1	-0.24716	7.57105	0.0182303	0.186676
LSM5	-0.245273	8.14574	0.0183739	0.186823
VASP	-0.330211	6.10987	0.0183657	0.186823
SLC38A2	0.256055	8.03408	0.0183374	0.186823
SCAF4	-0.405244	5.19984	0.0183064	0.186823
RAD23A	-0.369006	6.5171	0.0186001	0.188591
LILRA2	0.310822	6.36832	0.0185984	0.188591
ASUN	-0.306252	7.32292	0.0186803	0.189138
B3GLCT	0.500037	4.62119	0.0187117	0.18919
UQCRQ	0.232088	9.50386	0.0187739	0.189554
SIKE1	-0.370623	5.34084	0.0192693	0.191868
AAMDC	0.40563	5.14392	0.0191092	0.191868
SLC7A6	0.421435	5.23642	0.0191162	0.191868
ERGIC1	-0.274961	6.93968	0.0192059	0.191868
G3BP1	-0.222128	9.02885	0.0190945	0.191868
RPL10	0.223772	9.03588	0.0190719	0.191868
VPS51	0.316137	6.327	0.0192501	0.191868
ADGRA3	-0.381219	5.35663	0.0191815	0.191868
RNF181	0.275561	7.06109	0.0192327	0.191868
TOMM7	0.230967	9.2813	0.0192082	0.191868
SRSF9	-0.24594	8.04267	0.0193273	0.19218
FDXACB1	0.458054	4.65473	0.0194251	0.192886
GTF3A	0.253979	8.01658	0.0195467	0.193561
CSNK1D	0.285623	6.81407	0.0195227	0.193561
SNX1	-0.249989	7.47131	0.0196929	0.194741
ELK4	-0.382936	5.29972	0.0198217	0.195746
DDX20	-0.377559	5.90515	0.0198545	0.195801
RERE	0.369368	5.6819	0.0198844	0.195829
PPP1R7	0.362184	5.65163	0.0200026	0.196033
PANK2	0.294846	6.65023	0.0199881	0.196033
NDFIP1	0.275704	6.90759	0.0200912	0.196033
FOXK2	-0.306335	6.55649	0.0200955	0.196033
ARL5A	-0.332708	6.23632	0.020087	0.196033
ATXN7	-0.350277	5.61722	0.0200342	0.196033
NEMP1	-0.465781	5.00313	0.0199467	0.196033
SMDT1	0.340703	5.81648	0.0201278	0.196083
AP1G1	0.327227	6.24968	0.0201795	0.196321
CMPK1	-0.288874	6.8846	0.0202631	0.196869
RFC4	-0.245814	7.81627	0.0203457	0.197405
TNIP1	0.394848	5.09514	0.0205544	0.199118
NIFK	-0.243342	7.99058	0.0205972	0.199118
SND1	0.246852	7.74432	0.0206051	0.199118
MEAF6	-0.28906	6.59245	0.0206923	0.19946
MRPL52	0.253785	7.33236	0.0206958	0.19946
ZNF184	-0.32348	5.90274	0.0207429	0.199647
ALS2	0.388466	5.21845	0.0208925	0.199752
MEN1	0.336746	6.1146	0.02092	0.199752
TMEM261	0.407992	5.28826	0.0208027	0.199752
TMEM69	-0.496422	4.51695	0.0208788	0.199752
HEG1	0.511804	4.42867	0.0208555	0.199752
CMC1	-0.357633	5.89351	0.0208791	0.199752
RELA	0.320378	6.1473	0.0209838	0.200095
NUDT1	0.325566	6.15268	0.0212254	0.202132
LIMD1	0.410841	4.90384	0.021313	0.202431
SNRPE	-0.238276	8.1057	0.0212928	0.202431
UQCRFS1	0.263354	7.16397	0.0213658	0.202666
AHCTF1	0.358666	5.43913	0.0214978	0.20365
ABCC5	0.333323	6.38334	0.0215741	0.204104
PLK4	-0.400059	5.19789	0.0216451	0.204147
NMRAL1	0.302857	6.34847	0.0216288	0.204147
TEPSIN	0.387396	5.12657	0.0216635	0.204147
AAMP	-0.294806	6.42395	0.0218113	0.205271
TRUB1	-0.395423	5.04813	0.021851	0.205376
POLR2J	0.251489	7.72748	0.0219641	0.205925
FADS2	-0.305392	6.87766	0.0219665	0.205925
AUH	-0.383364	5.04826	0.022017	0.206131
RALBP1	-0.274783	6.9111	0.0223804	0.206697
ATXN7L3	0.357546	5.73099	0.0223794	0.206697
KPNA3	-0.317346	6.35767	0.0221109	0.206697
AAR2	0.372667	5.60055	0.0222921	0.206697
MTA2	-0.260343	7.06108	0.022193	0.206697
SAV1	-0.384643	5.31152	0.0222228	0.206697
SRP68	0.250341	7.40141	0.0221394	0.206697
HNRNPA3	-0.24943	8.74501	0.022342	0.206697
LSM10	0.327831	6.10074	0.0224216	0.206697
SDHAF3	-0.409611	5.48917	0.0224131	0.206697
HNRNPAB	-0.254198	8.92184	0.0223313	0.206697
GPAA1	0.289954	6.52163	0.0223587	0.206697
TTC14	-0.350493	5.46442	0.022644	0.208481
SPIN1	-0.274064	7.08386	0.022727	0.208978
CTHRC1	-0.249187	7.86266	0.0229301	0.210577
BID	0.258003	7.40753	0.0230292	0.210949
DYNC1LI2	0.283145	6.72555	0.023017	0.210949
ATP1B3	-0.227694	8.65719	0.0232038	0.212164
JAM3	0.314323	6.29815	0.0232206	0.212164
RSBN1	-0.348616	5.72768	0.0233241	0.21284
IFFO1	0.472063	4.58401	0.0234156	0.213
DOLPP1	-0.356479	5.46779	0.0233865	0.213
MARS2	-0.383474	5.38481	0.0234303	0.213
LSM8	-0.246551	7.38228	0.023471	0.213102
NPM1	-0.200586	10.3062	0.0235141	0.213224
DNAJB1	0.231258	8.52417	0.0235612	0.213383
MOSPD1	0.443942	4.60052	0.0237988	0.215265
NUDCD1	-0.38904	5.4727	0.0240596	0.216449
ANP32A	-0.232619	8.06344	0.023998	0.216449
IARS	-0.290613	7.40491	0.0240799	0.216449
TAPBP	0.270082	6.84771	0.0239669	0.216449
SYNRG	0.317869	5.99047	0.0240377	0.216449
FRMD8	0.337172	5.94023	0.024415	0.219187
MAPK1	-0.297823	6.8059	0.0246243	0.220008
QPRT	0.375627	5.16361	0.0245808	0.220008
DIAPH1	-0.229933	7.92971	0.024637	0.220008
PPP4R2	-0.240025	7.44302	0.0246895	0.220008
GOLGA8A	0.429983	4.80078	0.0246819	0.220008
TALDO1	0.246307	7.50217	0.0246204	0.220008
RPL27	-0.198868	10.7782	0.024737	0.220159
MCMBP	-0.314079	6.4609	0.024986	0.222101
PIR	0.347171	5.54391	0.0250324	0.222122
SNRPA1	-0.338067	6.0151	0.0250808	0.222122
AP5Z1	-0.411639	4.75038	0.0250673	0.222122
LTN1	-0.376674	5.15563	0.0253789	0.224487
LTV1	-0.284434	6.65688	0.0254507	0.224571
CDH12	-0.345071	5.87283	0.0254242	0.224571
PRKCSH	-0.452104	4.86591	0.0255175	0.224885
URI1	-0.250974	7.09549	0.0255814	0.224886
RUVBL2	0.271864	6.87322	0.0256112	0.224886
UBQLN2	-0.339303	5.62015	0.0255948	0.224886
MSRB2	0.358977	5.6293	0.0256473	0.224929
EIF4B	-0.402211	6.41145	0.0256813	0.224954
MAF1	-0.275824	6.9775	0.025714	0.224966
HAUS6	-0.347151	5.42926	0.0259277	0.226286
TRAPPC2L	0.27057	7.18227	0.0259119	0.226286
KLF12	0.477925	4.38695	0.0260755	0.227032
CTNNBL1	0.276637	6.57236	0.0260761	0.227032
EPDR1	-0.370189	6.05834	0.0263655	0.228999
KXD1	0.271042	6.86477	0.026358	0.228999
CSDE1	-0.203731	9.636	0.0264184	0.229179
CXXC1	0.275442	6.62385	0.0264498	0.229179
HIP1	-0.411029	4.85719	0.0266516	0.229548
YARS2	-0.341061	5.57351	0.0266063	0.229548
SETDB1	0.370992	5.19787	0.0266327	0.229548
DOK3	-0.319639	5.91804	0.0265777	0.229548
ING1	0.324225	5.8864	0.0265805	0.229548
AIFM2	0.45327	4.59928	0.0267101	0.229777
C6orf203	-0.343753	5.7372	0.0269158	0.230995
RNF213	0.358938	5.33595	0.0269021	0.230995
STEAP1B	0.503336	4.3624	0.0271596	0.232803
DEXI	0.30216	6.17051	0.027191	0.232803
PSMB4	0.225044	8.57175	0.0272965	0.233429
KLHDC10	0.335418	6.06635	0.027454	0.233943
DVL3	0.323828	5.98029	0.027427	0.233943
FEN1	-0.224384	8.00451	0.0274014	0.233943
PITPNA	0.360076	5.47345	0.027516	0.234195
RPL14	-0.206287	9.53236	0.0276832	0.23534
GALNT11	-0.383747	5.1113	0.0277556	0.235677
SEC62	-0.23911	8.16276	0.0278012	0.235787
COX7B	0.21193	9.01583	0.0278627	0.23603
YBX3	-0.218111	8.3392	0.0280826	0.236798
MAP7D1	0.288246	6.30821	0.0280323	0.236798
DBR1	-0.298851	6.1294	0.0281113	0.236798
DDX46	-0.220325	8.6485	0.0281175	0.236798
ANXA5	-0.392029	5.91466	0.0280726	0.236798
CEP85	-0.338189	5.46786	0.0281817	0.237062
RAPGEF1	0.351544	6.40918	0.0282971	0.237755
TIMM23	-0.224933	7.93504	0.0283561	0.237974
USP48	0.224891	7.81541	0.0284257	0.238097
MAN2A1	-0.279159	6.7093	0.0284503	0.238097
ZSCAN32	-0.414189	4.96666	0.02847	0.238097
JADE2	0.380118	5.21656	0.0286564	0.23906
MAK16	-0.326421	5.72321	0.0286549	0.23906
C12orf75	0.456882	4.6297	0.0286845	0.23906
MAP7	0.440191	4.84906	0.0287224	0.239099
ZMYND8	-0.232664	7.66147	0.0288808	0.239864
SUMO3	-0.207734	9.48968	0.028861	0.239864
ETS2	-0.2774	6.48046	0.0290458	0.240679
COPS9	0.269795	6.68991	0.0290451	0.240679
DNAJC13	-0.363317	5.25196	0.0291701	0.241432
DHX9	-0.264592	7.98929	0.0293029	0.241696
SAMSN1	-0.213807	8.46483	0.0292891	0.241696
CTB-50L17.10	-0.39364	5.54809	0.0292574	0.241696
MYL6B	0.308095	6.0537	0.0293427	0.241696
VARS	0.360011	5.46532	0.0293697	0.241696
ATAD5	-0.335799	5.53497	0.02946	0.242163
SNHG3	-0.250115	7.40425	0.0295147	0.242337
ROMO1	0.218541	8.02235	0.0296514	0.242995
CBX2	0.345351	6.05982	0.0296624	0.242995
FASTK	-0.292652	6.22578	0.0297479	0.243143
MRPS21	0.225903	7.83732	0.0297145	0.243143
PAPSS1	-0.286103	6.4991	0.0298071	0.243352
DOCK8	-0.376128	4.95264	0.0299724	0.244425
KIF18B	-0.321282	5.69749	0.0300705	0.244947
RSBN1L	-0.228317	7.60217	0.0301053	0.244954
PUS7	-0.328378	5.91981	0.0302602	0.245418
CWC27	-0.285199	6.661	0.0302913	0.245418
CFDP1	-0.289957	6.63167	0.0302985	0.245418
NOP56P1	0.384861	4.95149	0.0302708	0.245418
CCNY	-0.25195	7.09316	0.0303557	0.245535
DCTN2	0.247231	7.1224	0.030381	0.245535
UGCG	-0.285024	6.28898	0.0304534	0.245844
WDR7	0.527624	4.28187	0.0306583	0.246945
STIP1	-0.225947	8.07866	0.0306455	0.246945
IFT57	-0.218717	7.89628	0.0307032	0.24703
TTC33	-0.387657	4.90994	0.0309678	0.247936
DCTN4	0.296888	6.40224	0.0308585	0.247936
DIAPH2	0.305651	6.19512	0.0309462	0.247936
PDSS2	0.364358	5.09642	0.031007	0.247936
ARPC1A	-0.27856	6.89168	0.0309169	0.247936
UHRF1	-0.344771	5.29636	0.0310221	0.247936
EVI2A	-0.377353	5.07734	0.0310603	0.247966
GAMT	-0.337184	5.4147	0.0311708	0.248573
MAPK6	0.247887	7.02012	0.0314546	0.250378
C19orf12	0.373285	5.25905	0.0314665	0.250378
UBFD1	-0.323259	5.81373	0.0316365	0.251453
POLDIP2	0.273733	6.72433	0.0317224	0.251857
B4GALT1	-0.280283	6.2547	0.0317771	0.252015
TUBB4B	0.219598	8.11194	0.0318799	0.252552
CDK4	-0.204522	8.79796	0.0319575	0.252889
TBL1XR1	-0.221666	7.72477	0.0321429	0.254077
AKR7A2	0.281532	6.3739	0.0322171	0.254106
PSMD5-AS1	0.376263	4.97016	0.0322126	0.254106
WIPF1	0.233366	7.38422	0.0323164	0.254353
EIF5B	-0.192063	9.88699	0.032319	0.254353
CUL3	0.324383	5.64275	0.0324603	0.254908
CSTF1	0.313977	5.91339	0.0324311	0.254908
GALC	0.419711	4.53996	0.0325062	0.254991
MAP2K7	-0.313046	5.693	0.0329584	0.255934
CMTM6	-0.237465	7.75844	0.0329504	0.255934
BRD1	-0.453453	4.55096	0.0329814	0.255934
NCF2	0.423562	4.63428	0.0329355	0.255934
TSTD2	-0.372293	5.16583	0.0328854	0.255934
C19orf52	-0.386058	4.79955	0.0329669	0.255934
CENPC	-0.301511	5.92267	0.0328506	0.255934
DPM3	0.346922	5.54775	0.0329804	0.255934
DDX41	0.305661	6.32479	0.0327584	0.255934
C11orf31	-0.317017	6.3225	0.032662	0.255934
METTL26	0.278897	6.57342	0.0331364	0.256861
COX6C	-0.196158	9.75051	0.0332078	0.257137
CDK6	-0.200506	9.07144	0.0333513	0.257862
TROAP	0.411702	4.75469	0.0334199	0.257862
SKA3	-0.336097	5.32321	0.0334018	0.257862
PRMT3	-0.442235	4.74433	0.0334445	0.257862
RSRP1	-0.249388	7.09991	0.033527	0.257866
E2F6	0.34037	5.45033	0.0334825	0.257866
LINC00116	-0.330155	5.55041	0.0335523	0.257866
TST	0.311402	5.74509	0.0336642	0.258176
YTHDF2	0.234365	7.44146	0.0336486	0.258176
SP100	-0.381087	5.26796	0.0337617	0.258552
ISG20L2	-0.276397	6.87541	0.0337851	0.258552
CDCA7	-0.209714	8.46311	0.0339563	0.259587
ZNRD1	-0.294533	6.70301	0.0340348	0.259906
SLC38A1	-0.214581	8.34138	0.0342197	0.259906
MITD1	-0.327123	5.38492	0.0340976	0.259906
TMEM161B	0.307517	5.76536	0.0341474	0.259906
SETD5	0.257134	7.61901	0.0341532	0.259906
CALR	-0.230617	9.30725	0.0342821	0.259906
UCKL1	-0.445062	4.46039	0.0342863	0.259906
RCC1L	0.275294	6.30685	0.0341793	0.259906
MIR3142HG	0.413872	4.93592	0.0343317	0.259976
ZCCHC8	-0.306081	6.09213	0.0347407	0.261297
UBE2A	-0.26135	7.11442	0.0346988	0.261297
NOP56	-0.219066	8.15677	0.0349049	0.261297
MED26	0.346779	5.24696	0.0348914	0.261297
PUDP	0.319905	5.72649	0.0347577	0.261297
PPP3CA	-0.242403	7.00249	0.0347729	0.261297
IFNAR1	0.344956	5.17497	0.0348687	0.261297
ANKRD40	-0.306934	5.89089	0.0347726	0.261297
GMEB1	-0.329048	5.36103	0.034732	0.261297
AHCYL1	0.219874	8.89469	0.0345979	0.261297
VPS13A	-0.279799	6.24645	0.0348703	0.261297
NCAPD3	-0.304792	5.97111	0.0349415	0.2613
REV1	-0.394327	5.08702	0.0350603	0.261646
CAPZA2	-0.317607	5.99463	0.0350536	0.261646
DBP	-0.452804	4.26481	0.0351878	0.262326
RABL2B	-0.306582	5.6817	0.0353683	0.263399
GCC2	-0.340328	5.14352	0.0354232	0.263535
ZNF337	0.446121	4.27625	0.0354718	0.263625
FIZ1	0.435634	4.71994	0.0355585	0.263997
PITX1	-0.229467	7.48635	0.0359201	0.266029
FXYD5	-0.3203	6.26405	0.0360274	0.266029
RPL23	-0.201219	11.0684	0.0360536	0.266029
ORMDL1	0.27151	6.438	0.0358781	0.266029
RFX7	-0.400219	4.97334	0.0359938	0.266029
ANXA2	0.227668	7.53146	0.035944	0.266029
ATL3	0.281868	6.35548	0.0361611	0.266549
PLOD1	0.297297	5.92508	0.0363736	0.267362
FUS	0.200599	8.94834	0.0365756	0.267362
TIMM44	-0.333341	5.31192	0.0365658	0.267362
TRAP1	0.219984	7.61603	0.0366006	0.267362
SARAF	-0.217498	7.744	0.036406	0.267362
ARL6IP1	-0.309043	7.20874	0.03645	0.267362
CFL1	-0.187442	9.84606	0.0365963	0.267362
TOP1MT	0.319162	6.14713	0.0366051	0.267362
SIRT7	0.29651	6.09873	0.0364831	0.267362
AKAP8	0.292996	6.00826	0.0367345	0.267764
MRPL30	0.250107	7.06108	0.036712	0.267764
CCNL1	-0.235803	7.0952	0.0368625	0.268426
APH1B	0.433263	4.96988	0.036994	0.269112
COG5	0.350009	5.02662	0.0370394	0.26917
MT-CO2	-0.173537	11.9978	0.037096	0.26931
WDR54	0.3318	5.5536	0.0373782	0.269684
CEP68	0.418459	4.61663	0.0378993	0.269684
MRPS10	0.25914	7.07884	0.0380215	0.269684
IKBKAP	-0.306801	5.76383	0.0373821	0.269684
UBA5	-0.255206	6.64374	0.0378941	0.269684
TMED2	-0.259836	7.21437	0.0377747	0.269684
PSMC5	0.203943	8.54038	0.0379919	0.269684
TNRC6B	-0.279759	6.14322	0.0376911	0.269684
BRIX1	-0.254113	6.71253	0.0375147	0.269684
CEBPZ	-0.261904	6.48197	0.0379712	0.269684
CNOT1	0.217764	7.91993	0.0373661	0.269684
RPAIN	0.317815	5.71148	0.0380825	0.269684
SNAP47	0.336977	5.48206	0.0377325	0.269684
LUC7L2	-0.223055	7.46411	0.0380827	0.269684
C18orf25	-0.387199	4.91756	0.037624	0.269684
CHAF1B	0.327535	5.59044	0.0375776	0.269684
FOXK1	-0.287176	6.06008	0.037979	0.269684
PHB	0.212215	8.58869	0.0379663	0.269684
APEX2	0.345791	5.3859	0.0378616	0.269684
MAGED1	0.226489	7.39294	0.0372646	0.269684
CCDC43	-0.258802	6.83543	0.0379881	0.269684
C5orf24	0.282282	6.64833	0.0377592	0.269684
C5orf56	0.338436	5.25402	0.0374093	0.269684
RACK1	-0.21302	10.3979	0.0372794	0.269684
AC093673.5	0.448419	4.33338	0.0377301	0.269684
CSTB	-0.275835	6.78176	0.0381407	0.26983
UBE2Z	-0.253261	6.93448	0.0382361	0.269958
SETD3	-0.300132	5.87032	0.0382712	0.269958
OXLD1	0.333399	5.43734	0.0382364	0.269958
DERA	-0.355505	5.45419	0.0385876	0.270695
SNRNP40	-0.415848	5.34079	0.039124	0.270695
SNX10	0.275768	6.56192	0.0386344	0.270695
TPD52L2	-0.254379	6.70084	0.0385401	0.270695
UBE2I	-0.202655	8.6646	0.0388463	0.270695
PITRM1	0.344004	5.35418	0.0388488	0.270695
WDR75	-0.348471	5.73778	0.0384462	0.270695
DDX54	0.264412	6.63186	0.0391872	0.270695
PPP1R12C	0.307307	5.87626	0.0392769	0.270695
HAT1	-0.305566	6.69552	0.0390865	0.270695
THEM6	0.310792	5.75825	0.0386868	0.270695
SLF1	-0.447505	4.5206	0.039005	0.270695
TPGS2	0.239425	7.50954	0.0389576	0.270695
TEX10	0.315813	6.36285	0.0392056	0.270695
CIR1	-0.260453	6.71978	0.0386668	0.270695
SLC10A4	0.372854	5.09885	0.0389618	0.270695
UPF2	-0.247183	6.82598	0.0391578	0.270695
ANKLE1	0.274068	6.48168	0.038489	0.270695
LY6E	-0.399394	5.39878	0.0388169	0.270695
CCDC66	-0.301369	5.84128	0.0391481	0.270695
HGS	0.300984	5.98404	0.0392531	0.270695
FAM212A	0.341967	5.15728	0.0392038	0.270695
TBC1D9B	0.287551	6.11453	0.0391265	0.270695
KMT2B	0.371803	5.37136	0.0389362	0.270695
FBXL20	-0.359308	4.93049	0.0394015	0.271295
STK38	-0.2934	5.99631	0.0395715	0.271717
PWWP2A	-0.301288	5.73068	0.0395282	0.271717
FAM192A	0.229648	7.20369	0.0395759	0.271717
H3F3B	-0.177446	10.5254	0.0396715	0.272114
GALNT2	-0.264506	8.04897	0.0398399	0.27275
SLC12A9	0.427788	4.64086	0.0398257	0.27275
MUM1	0.264409	6.41086	0.040003	0.273482
SGF29	0.399907	4.65028	0.0400226	0.273482
TCEA1	-0.357694	5.67991	0.040092	0.273697
ORC4	0.323044	5.74411	0.040193	0.274126
FH	-0.232707	7.07717	0.0402618	0.274336
PPP2R5C	-0.218095	7.48521	0.0403781	0.274856
ADD3	-0.327325	5.43398	0.0404228	0.274856
RP9	0.277231	6.40014	0.0404525	0.274856
NBN	-0.332219	5.30088	0.040509	0.274981
CENPO	0.359834	5.00793	0.0407157	0.275883
NDUFA11	0.232318	7.41286	0.0407185	0.275883
IL6ST	-0.330746	5.25724	0.0408526	0.276532
MRPL18	-0.218968	7.7717	0.0411436	0.277836
CCDC91	-0.320885	5.72966	0.0410957	0.277836
ETV6	-0.246225	7.2518	0.0411608	0.277836
TUBB6	0.220873	8.75088	0.041202	0.277853
MARCKSL1	-0.24916	7.4727	0.0413998	0.278927
RAP2A	-0.303289	5.92587	0.0415048	0.278978
ANKRD49	-0.269373	6.21662	0.041504	0.278978
LIN28B	-0.409678	4.53706	0.0415623	0.278978
ATAD3A	-0.278246	6.21854	0.0415396	0.278978
NAGPA	0.432392	4.72054	0.0418065	0.280336
CYC1	0.208764	7.91891	0.0418424	0.280336
ANKS6	0.361132	4.9548	0.0419286	0.280393
RPS27L	-0.228867	7.30083	0.0419252	0.280393
CASC3	-0.261973	6.61234	0.0421571	0.281399
TIAL1	0.225118	7.68872	0.042139	0.281399
MAST4	0.257524	6.64842	0.0422948	0.282056
LPCAT3	-0.285628	6.14076	0.0423943	0.282459
VPS45	0.389222	4.71118	0.0424575	0.282619
PDE4D	0.413935	4.81203	0.0425449	0.282788
TWF1	-0.344629	5.11551	0.0425615	0.282788
RP11-135F9.3	0.448376	4.47962	0.0426358	0.283022
PTPA	-0.297977	6.21878	0.0427441	0.28348
DNPEP	0.310123	5.49937	0.0429113	0.283785
CAB39	-0.313319	5.5901	0.0429516	0.283785
RPS8	-0.171427	11.0745	0.0429473	0.283785
INTS5	-0.406567	4.57136	0.042987	0.283785
SEMA4D	0.283237	6.1089	0.042985	0.283785
ANP32B	-0.190522	9.11536	0.0434344	0.286476
UBR5	0.245563	6.70002	0.0435725	0.286822
GALNT10	0.390548	4.63936	0.0435325	0.286822
TMEM68	-0.424109	4.4098	0.0436062	0.286822
OSBPL8	-0.263792	6.44362	0.0437449	0.287472
FRA10AC1	-0.253389	6.53539	0.043953	0.287799
PTDSS1	0.237498	7.07887	0.0439176	0.287799
KAT6B	-0.256921	6.39756	0.0439544	0.287799
TPRA1	0.32912	5.22677	0.0438757	0.287799
PNPLA2	0.434097	4.33831	0.044141	0.288759
HDLBP	0.259195	6.58329	0.044246	0.289183
MKL2	0.404159	4.66784	0.0444301	0.290124
DOT1L	0.320098	5.81526	0.0444954	0.290287
C11orf49	0.344404	5.01325	0.0445769	0.290294
SLBP	-0.26833	7.46407	0.0445377	0.290294
PELP1	-0.333153	5.35351	0.044704	0.290665
DNAH14	-0.277329	6.04945	0.0447146	0.290665
RRP15	-0.235587	6.98489	0.0448783	0.291439
RPLP0	-0.180126	10.462	0.0449836	0.291439
TMEM38B	-0.306473	5.67025	0.0449954	0.291439
JMJD8	-0.290568	6.08715	0.0449433	0.291439
KBTBD2	-0.366555	5.41923	0.0450925	0.291806
NDRG3	0.282329	6.08698	0.045305	0.292143
KCTD15	-0.388692	4.58924	0.0454036	0.292143
SNIP1	-0.325007	5.35236	0.0453265	0.292143
RPSA	0.192227	8.56431	0.0454687	0.292143
YIF1A	0.250589	6.82611	0.0454039	0.292143
PIM3	-0.223614	7.13829	0.0454369	0.292143
GPC2	0.487374	4.39003	0.0452192	0.292143
ZNF280B	-0.339777	4.9616	0.0452393	0.292143
TMEM126A	-0.233618	6.94657	0.0455752	0.292566
PHF20	0.241272	6.76459	0.0459604	0.292953
MAT2B	-0.25159	7.129	0.0459596	0.292953
EIF4G2	-0.179832	10.5294	0.0459957	0.292953
PODXL2	-0.313677	5.35338	0.0460028	0.292953
C16orf70	0.354497	5.09568	0.0458061	0.292953
VPS25	0.257746	6.42378	0.0458354	0.292953
BARD1	0.311031	5.64149	0.046081	0.292953
GLUD1	-0.270422	6.58037	0.0457234	0.292953
SSRP1	-0.192846	9.09589	0.0459384	0.292953
SH3BP5L	0.415967	4.59042	0.0460825	0.292953
MLXIP	0.256026	6.69283	0.0459177	0.292953
PIK3CA	-0.365899	4.85671	0.0462697	0.293319
TCF25	0.199135	8.73055	0.0463028	0.293319
KLHDC2	0.280392	6.65009	0.0462809	0.293319
FAR1	-0.260542	6.71838	0.0462351	0.293319
CASP2	-0.224884	7.24177	0.0466412	0.295052
HELLS	-0.198123	8.24257	0.0466583	0.295052
MDN1	0.271601	6.25608	0.0467782	0.29553
NOSIP	0.27066	6.25206	0.0468158	0.29553
KCTD20	-0.295557	5.68071	0.0469296	0.295989
PLAUR	-0.311142	5.44887	0.0470639	0.296318
IFITM3	0.249883	6.89942	0.0470357	0.296318
UBE2D1	-0.294013	5.70763	0.0471185	0.296402
PGS1	0.252833	6.67579	0.0473534	0.296641
SLC9A3R1	0.230457	7.30089	0.0472492	0.296641
STT3A	-0.23054	6.87848	0.0473622	0.296641
RNF123	0.392201	5.01583	0.0472755	0.296641
MSRA	0.33709	5.17323	0.0473018	0.296641
MARK3	0.275509	6.00976	0.047469	0.296807
SRM	-0.197319	8.72746	0.0475111	0.296807
VAMP4	0.329731	5.17179	0.0475121	0.296807
FSCN1	-0.194585	9.08936	0.0475764	0.296906
SCOC	0.229674	7.19833	0.0476104	0.296906
HARS2	0.337434	5.18747	0.0477674	0.297511
KIAA0895L	0.422553	4.53201	0.0477899	0.297511
ZBTB11	0.313415	5.50208	0.0478918	0.297888
DHX33	-0.254146	6.55138	0.047976	0.298154
C4orf48	0.336782	5.65901	0.0480571	0.298401
SHISA2	-0.258114	6.6316	0.0481381	0.298647
R3HCC1	0.321832	5.54352	0.0481811	0.298656
MFSD3	0.341157	5.03067	0.0482421	0.298778
ING3	-0.290365	5.65345	0.0483792	0.29937
CCDC59	-0.246189	6.87115	0.0484548	0.29958
SLAIN2	-0.278971	5.91809	0.0485102	0.299666
RNF126	-0.234988	7.26423	0.0487048	0.299699
RAB10	-0.222047	7.77084	0.0487234	0.299699
RAB5B	-0.414665	4.67298	0.0486331	0.299699
ZEB2	-0.338187	4.96764	0.0487106	0.299699
CROCCP2	0.364884	4.81808	0.0486291	0.299699
CARHSP1	-0.334809	5.65559	0.0488648	0.300255
MFF	0.260364	6.33031	0.0489388	0.300255
NET1	-0.292795	6.37446	0.0489278	0.300255
DCLRE1C	0.399754	4.63653	0.0490176	0.300483
UBE2T	-0.221009	7.13961	0.0490645	0.300515
CRTAP	-0.248909	6.78004	0.04919	0.301028
CAMKK2	0.280975	6.24133	0.0493847	0.301468
GRK6	0.342389	4.92869	0.0493068	0.301468
PPT2	0.385001	4.6347	0.0493873	0.301468
ACTR2	-0.185542	8.89023	0.0495007	0.301904
ADGRE5	0.326372	5.28953	0.0497416	0.303065
COX5B	0.201075	8.46892	0.0497751	0.303065
RP11-466H18.1	-0.411919	4.46342	0.0498316	0.303153
LYSMD2	-0.29215	5.64651	0.0498961	0.303289
FAM20B	-0.325751	5.40947	0.0499904	0.303606
RREB1	0.336782	5.10712	0.0503417	0.305389
CFL2	-0.373989	4.6422	0.0503686	0.305389
HK1	0.219869	7.1506	0.0504757	0.305781
SLCO3A1	-0.343464	5.03422	0.0506559	0.306358
ZNRF1	-0.2884	5.70881	0.0506371	0.306358
CUTA	0.208854	7.60261	0.0507064	0.306406
SMC6	-0.326142	5.17715	0.0508441	0.306789
RP11-400F19.6	0.341132	5.00984	0.0508548	0.306789
FASTKD2	0.320294	5.49596	0.0509969	0.307389
CYTH3	-0.379464	4.66014	0.0512036	0.308119
RAB27A	-0.384776	4.79278	0.0511711	0.308119
EP400	0.244734	6.62083	0.0512879	0.308369
RAB22A	-0.278825	5.83102	0.051359	0.308539
HPS6	-0.353414	4.87898	0.0514408	0.308773
SLC39A4	-0.218726	7.24911	0.051486	0.308788
CRY1	0.285816	5.76786	0.0516265	0.308859
TMEM120A	0.337548	5.31513	0.0516037	0.308859
AP001171.1	0.401749	4.58166	0.0515904	0.308859
ANKH	-0.413177	4.48337	0.0518409	0.309885
RP11-352M15.2	0.375915	4.63135	0.0521586	0.311526
TMEM106C	-0.271273	6.87187	0.0522217	0.311644
VPS33A	0.293607	5.63072	0.0522716	0.311684
ACOT13	-0.224792	7.44278	0.0525299	0.311934
PPWD1	-0.354894	5.03491	0.0525123	0.311934
MGAT4B	-0.242761	7.21393	0.0524487	0.311934
MRPL14	0.242206	6.62524	0.0523879	0.311934
ZNF335	0.36185	4.66955	0.0525026	0.311934
SNAPC2	0.368602	4.79274	0.052855	0.313606
DDB1	-0.193356	8.23386	0.0529967	0.31393
RPL38	-0.174334	11.2659	0.0529552	0.31393
REST	-0.220486	7.04084	0.0531995	0.314578
EDEM1	-0.507642	4.86215	0.053237	0.314578
SAP130	0.300063	5.39072	0.0531603	0.314578
UXS1	-0.2772	6.20183	0.0533694	0.315102
IL27RA	-0.263135	6.59265	0.0535032	0.315634
ZNF638	-0.347762	5.40894	0.0536488	0.315803
KIAA1191	0.249923	6.44293	0.0537037	0.315803
GALNS	0.371875	4.86808	0.0537071	0.315803
MALSU1	0.2122	7.42596	0.0537029	0.315803
RPS10	-0.255451	7.7884	0.0538012	0.316098
HYAL3	0.479736	4.25554	0.0538993	0.316417
PLPP5	0.284905	5.78049	0.0539752	0.316605
ZFP91	-0.234426	6.75576	0.0540529	0.316803
ANTXR2	-0.246756	6.87028	0.0541198	0.316937
SPATA20	0.310278	5.2821	0.0542785	0.317111
CPSF1	0.217831	7.22058	0.0541959	0.317111
HES6	0.316536	5.83136	0.0542978	0.317111
NDUFB11	0.195284	7.92562	0.0543254	0.317111
CBL	-0.315872	5.76854	0.0545904	0.317629
YTHDF1	0.222804	7.00676	0.05459	0.317629
MED27	-0.230113	6.83504	0.054524	0.317629
SFN	0.272155	6.3344	0.0545117	0.317629
CCAR1	-0.185893	8.93523	0.0547145	0.318094
FAM13B	-0.301636	5.69624	0.0548299	0.318508
STAT5A	-0.256906	6.20772	0.0550136	0.319318
POLR2A	0.243909	6.69948	0.0551155	0.319652
KMT2C	-0.250666	6.39889	0.0552209	0.319922
SNRPD3	-0.224513	7.19568	0.055517	0.319922
BIN2	0.388549	4.50792	0.0553626	0.319922
IRF1	0.380158	4.72759	0.055356	0.319922
PRPSAP2	0.36403	4.72663	0.0554129	0.319922
ALG8	0.219182	6.99187	0.0553303	0.319922
VAV2	0.379542	4.69094	0.0554295	0.319922
TUBA1A	-0.196804	7.74842	0.0554909	0.319922
FLT1	-0.38226	4.50494	0.0555795	0.320026
ITPRIPL2	-0.230139	6.80306	0.0556795	0.320346
MYH9	0.198483	7.7883	0.055787	0.320708
TSTD1	0.321893	5.05266	0.0558669	0.320912
SIX4	-0.392141	4.43313	0.0559171	0.320944
MED1	-0.189449	8.29353	0.0561896	0.32123
DYNLRB1	0.272576	6.07788	0.0561494	0.32123
CDK12	-0.263344	6.57841	0.0561098	0.32123
ERCC4	-0.344936	4.81691	0.0561488	0.32123
RPL32P3	0.40197	4.39764	0.0561034	0.32123
U2AF2	-0.185517	8.43545	0.0563411	0.321457
AARS2	0.342963	5.00405	0.0563631	0.321457
PURB	0.273328	6.22184	0.0562875	0.321457
GOLGA7	-0.262966	6.52632	0.0567066	0.32316
UTP11	0.219486	7.27352	0.0567652	0.323239
MYD88	-0.286539	6.31729	0.0568501	0.323467
SNX11	0.359521	4.82629	0.0572755	0.324351
DGKH	0.328103	5.31444	0.0570994	0.324351
GNL2	-0.194669	7.96111	0.0571187	0.324351
PREB	0.261393	6.614	0.0572419	0.324351
DDX28	0.322099	5.14179	0.0572542	0.324351
SRGAP2	0.31378	5.74093	0.0571949	0.324351
CECR5	-0.288297	6.20075	0.0574118	0.324359
NFYB	-0.270061	5.98911	0.0573534	0.324359
ZMYM1	-0.351758	4.96104	0.0573898	0.324359
ACTR1A	0.255215	6.40681	0.0576004	0.32517
PLPP1	0.382633	4.4806	0.0580271	0.327322
PPM1F	0.331819	5.12368	0.0581537	0.327779
UNC45A	0.26192	6.07473	0.0583089	0.328397
TATDN2	0.291588	5.97677	0.0584613	0.328999
CD47	-0.214469	7.23646	0.0585947	0.329493
AC005682.5	0.352189	4.85227	0.0587049	0.329855
MYB	0.209902	7.5449	0.0587602	0.329909
MYL12A	-0.236705	7.1536	0.0590134	0.330021
ACD	0.346149	4.89959	0.0589652	0.330021
NEK6	0.303374	5.87746	0.0588872	0.330021
NSDHL	0.362015	4.84876	0.0589704	0.330021
RPS27	0.187343	9.25409	0.0590549	0.330021
CCDC167	0.263931	6.04815	0.0590126	0.330021
BRAP	-0.397045	4.7469	0.0592243	0.3302
CUEDC2	0.274262	6.13708	0.059188	0.3302
TCF19	0.325914	5.48217	0.0592194	0.3302
FBXL3	-0.296973	5.45235	0.0594599	0.331001
CDC25B	0.293857	6.2032	0.0594356	0.331001
ANLN	-0.323704	5.38531	0.0595716	0.331367
HBS1L	-0.265966	6.08971	0.0597123	0.331893
PTP4A2	-0.194759	8.7546	0.0598275	0.332278
PPP5C	-0.363451	5.15293	0.0600221	0.33259
C12orf65	-0.246046	6.28232	0.0600212	0.33259
GNG2	0.240237	6.90815	0.0599705	0.33259
LRPPRC	-0.201038	8.34802	0.0600735	0.332619
GCNT1	0.347594	4.78275	0.0601245	0.332646
SBF1	0.297775	5.89099	0.0606651	0.333122
NUP107	-0.23232	6.64414	0.0606002	0.333122
TWSG1	-0.334114	4.97219	0.0603035	0.333122
HNRNPA1	-0.198217	9.31931	0.0605158	0.333122
NBAS	0.294372	5.6512	0.0607006	0.333122
RPGR	-0.345075	4.83157	0.0604725	0.333122
YDJC	0.244957	6.39084	0.0605835	0.333122
RFT1	-0.281849	5.74039	0.0604685	0.333122
NDUFV1	0.226363	7.03203	0.0603762	0.333122
CES2	0.29413	5.65458	0.0607189	0.333122
ZNF84	0.373605	4.58533	0.0605375	0.333122
RNF115	-0.236041	6.53764	0.0609509	0.33414
CAMK1D	0.383506	4.68182	0.0611373	0.334908
MZT1	-0.234872	6.69908	0.0611981	0.334986
NUMA1	-0.229267	6.66247	0.0612771	0.335165
MTMR2	0.285683	5.94114	0.0614537	0.335875
PRKAG2-AS1	0.446718	4.427	0.0615209	0.335988
ATP11C	0.279846	5.7578	0.0617697	0.336364
RHOT2	-0.247105	6.27714	0.0617227	0.336364
RPL13	-0.163343	11.1162	0.0618231	0.336364
FNTA	0.272623	5.92684	0.0617156	0.336364
MCRS1	0.226083	6.87945	0.0618158	0.336364
GFOD2	-0.341575	4.82268	0.0620288	0.337229
ATAD1	-0.240123	6.3428	0.0621023	0.337374
SIX5	0.371756	4.58543	0.0622459	0.337899
IRAK1	0.209154	7.17482	0.0623504	0.338212
HSPA8	-0.248727	8.59537	0.062469	0.338346
PTMS	-0.350195	5.0465	0.0624655	0.338346
GID8	-0.211596	7.16446	0.0626557	0.339103
ARID3B	0.330467	5.53112	0.0627522	0.33937
CABLES1	0.309646	5.30009	0.0631107	0.339479
NPEPPS	0.214178	7.45217	0.0630335	0.339479
CTDSP1	0.297494	5.58404	0.0629629	0.339479
QTRT2	-0.321372	4.95278	0.063149	0.339479
NOL6	0.306325	5.18502	0.0630845	0.339479
PDIA3	-0.259952	6.32989	0.0629699	0.339479
ZNF354A	0.331457	4.98711	0.062994	0.339479
PGAP1	0.341844	5.15323	0.0629618	0.339479
FANCD2	0.247877	6.68107	0.0632324	0.339674
LRRC41	-0.266743	6.07779	0.0632897	0.339729
BAZ1A	-0.198685	7.39624	0.0634479	0.340324
PDS5B	-0.298091	5.51453	0.0635587	0.340665
CHID1	0.226383	7.4769	0.0638317	0.341874
CLUH	0.259274	5.99763	0.0639703	0.342362
GSR	-0.262698	6.12369	0.0640629	0.342604
DNAJC2	-0.177762	8.70433	0.0641711	0.342928
TMEM30A	0.241841	6.32083	0.0643033	0.343013
MECR	0.332623	5.06448	0.0643622	0.343013
SRRM2	0.204678	8.77667	0.0643252	0.343013
HCFC1	0.200647	8.11136	0.0644087	0.343013
TXNIP	-0.200504	7.4298	0.064425	0.343013
FURIN	0.286081	5.65431	0.0646533	0.343975
GIT2	0.246371	6.42252	0.0648822	0.344894
ZSCAN29	0.296135	5.69048	0.0649219	0.344894
COX4I1	0.166804	9.70276	0.0650206	0.345164
PRKD3	-0.231351	6.53098	0.0652314	0.345521
NCAPH	-0.283506	6.35029	0.0651789	0.345521
ZNF219	0.407592	4.82981	0.0651921	0.345521
ZNF268	-0.288461	5.34621	0.0653222	0.345747
PAFAH1B3	0.215307	6.91841	0.0654581	0.346213
GSKIP	0.306862	5.27481	0.0656159	0.346792
FBXO31	0.346619	4.91121	0.065737	0.346924
MRPL20	0.187643	8.165	0.065727	0.346924
ICE1	-0.256779	6.20598	0.0659659	0.347877
GOLGA4	-0.228772	6.49013	0.066053	0.348082
RNASEH1-AS1	-0.425685	4.3292	0.0661095	0.348125
SEC24A	0.379071	4.6034	0.0661764	0.348223
ERAP2	-0.26341	6.03063	0.0662942	0.348588
TMEM127	0.31284	5.33266	0.0666592	0.350252
BSDC1	-0.350196	4.84787	0.0667574	0.350513
NDUFB4	-0.218813	8.47766	0.0669437	0.350965
MTX2	-0.258654	6.50188	0.0670383	0.350965
POLR1C	0.261357	6.01835	0.0669554	0.350965
CTC-444N24.11	0.269278	5.73324	0.0670033	0.350965
TOPBP1	0.195756	7.58465	0.0673573	0.35238
BAG1	0.237708	6.54899	0.0674191	0.352442
HGSNAT	0.312219	5.56414	0.0674671	0.352442
ST3GAL6	0.309782	5.40322	0.0676111	0.352684
BAG6	0.220878	6.85791	0.0675788	0.352684
PABPC1L	0.355304	5.09939	0.0677023	0.352809
POLD2	0.223164	6.82982	0.0677331	0.352809
URB2	-0.297805	5.24109	0.067891	0.353376
DNAJC12	0.367321	4.64154	0.0679406	0.353379
AP1B1	-0.217357	6.78381	0.0681673	0.354048
RPL11	-0.158787	11.2155	0.0681635	0.354048
ISOC2	-0.335425	5.3361	0.0682395	0.354167
TRIM28	-0.205586	7.67785	0.0684284	0.354521
METTL23	0.24339	6.23122	0.0684444	0.354521
RPL13P12	-0.338376	6.6245	0.0684552	0.354521
DLG5	0.3382	4.88021	0.0686763	0.354939
GFM1	-0.210209	6.98961	0.0686033	0.354939
ATP2A2	0.189105	7.91239	0.0687148	0.354939
CLECL1	0.314933	5.11053	0.0687328	0.354939
ARRB2	0.259452	6.35807	0.0689534	0.355823
CNOT6	0.213939	7.45125	0.0690509	0.355867
WRNIP1	-0.300876	5.58085	0.0690607	0.355867
TGIF2	-0.285881	5.80684	0.0691807	0.356231
MGEA5	0.215946	6.81741	0.0696685	0.358487
HADHA	0.188525	7.9326	0.0699337	0.359595
ALG5	0.256677	6.09725	0.0701284	0.360082
MRPS16	0.185152	8.24547	0.0700885	0.360082
VAV1	0.399119	4.41406	0.0702831	0.360476
ANKRD22	-0.268295	5.68307	0.0703051	0.360476
ACSM3	0.390338	4.31256	0.0704127	0.360682
RFC2	-0.247389	6.37614	0.0705281	0.360682
GPSM2	-0.29979	5.24766	0.0705454	0.360682
LLPH	-0.221867	6.72498	0.0705161	0.360682
PSME4	0.215614	6.98026	0.0711302	0.361246
SMCHD1	0.236472	6.82134	0.0711196	0.361246
MMD	-0.269419	5.92372	0.0707378	0.361246
CLK4	0.356832	4.87842	0.0711569	0.361246
MOGS	0.25736	6.08909	0.0709571	0.361246
ITGB1BP1	0.21326	7.23762	0.071117	0.361246
ZNF689	0.392016	4.59866	0.0709773	0.361246
USP32	0.287039	5.66418	0.0707981	0.361246
ANO6	-0.324265	4.94709	0.0711222	0.361246
MAN2A2	0.25214	6.31851	0.071044	0.361246
ADPRHL2	0.283238	5.38983	0.0712086	0.361255
HERPUD1	-0.276892	5.84494	0.0712943	0.361435
YTHDC2	-0.248157	6.09542	0.0714253	0.361591
EZH1	0.350803	4.71934	0.0714166	0.361591
ACTG1	-0.161757	10.9775	0.0714963	0.361696
ALMS1	0.331691	5.00302	0.0719315	0.363388
SDHC	-0.214963	7.20564	0.0719269	0.363388
MTCH1	0.180088	8.373	0.0720807	0.363886
PVT1	0.424357	4.58515	0.0721583	0.364023
YEATS2	0.242762	6.90529	0.0726151	0.366072
BCL2L1	-0.281323	5.50847	0.0726686	0.366085
ZNF292	-0.249287	6.03515	0.0727491	0.366235
SPTBN1	0.184056	7.82102	0.072848	0.366477
IER3IP1	-0.193065	7.49678	0.0728995	0.36648
AATF	0.223066	6.66069	0.0730652	0.367057
PNN	-0.178003	8.13	0.0732125	0.367541
PTPMT1	0.29513	5.35601	0.0733186	0.367818
IL17RA	0.244322	6.13163	0.0733784	0.367862
TP53I3	0.372086	4.39316	0.0736852	0.368298
CDC42SE2	-0.212806	7.05688	0.0737138	0.368298
HDAC3	0.229454	6.53744	0.0735588	0.368298
ZNF252P	0.266297	6.25591	0.0736646	0.368298
PSMB9	0.30427	5.2094	0.0737208	0.368298
GALNT18	-0.280998	5.50431	0.0737789	0.368333
SETD1B	0.299591	5.36687	0.0738558	0.368461
MANEA	-0.31144	5.09982	0.0741022	0.36918
LRRC75A-AS1	-0.173918	8.96105	0.0740522	0.36918
PSMB5	0.188312	8.57167	0.0742091	0.369202
CEBPG	-0.265318	5.70523	0.0741776	0.369202
PRSS21	0.180578	8.56109	0.0750018	0.369503
FAM114A2	0.315293	4.85964	0.0750341	0.369503
FOXRED1	0.373924	4.52054	0.0746859	0.369503
NENF	0.205509	7.41223	0.0750386	0.369503
LDAH	-0.281439	5.36269	0.0747019	0.369503
UBAC1	0.194168	7.75381	0.0747692	0.369503
DMTF1	-0.371152	4.84073	0.0744007	0.369503
SNRNP25	0.237856	6.26062	0.0749479	0.369503
PSMD6	-0.223517	7.07946	0.0748089	0.369503
ALKBH3	0.308671	5.00597	0.0749915	0.369503
ZNF282	0.290752	5.45	0.0745345	0.369503
SHCBP1	-0.27187	5.8917	0.0748691	0.369503
MEX3D	-0.252795	6.05866	0.0748715	0.369503
C4orf46	-0.222732	6.52681	0.0749295	0.369503
C22orf39	0.238931	6.19377	0.0743749	0.369503
GSTM3	0.198004	7.43221	0.0751588	0.36959
ZMAT2	-0.174729	8.25646	0.0751573	0.36959
KLHL21	0.243626	6.69421	0.0752628	0.36985
SPHK2	0.41478	4.36927	0.075489	0.370249
SMAP2	0.334781	4.82937	0.0754133	0.370249
KIAA0101	-0.166148	9.2137	0.0754982	0.370249
USP14	-0.190309	7.6567	0.0757698	0.370398
ARPC3	-0.187052	7.98438	0.0757058	0.370398
SNRNP27	-0.239996	6.2183	0.0757854	0.370398
RPL4	-0.181278	9.74523	0.0757249	0.370398
ADO	0.223339	6.69806	0.0756815	0.370398
RFTN1	0.299754	5.63174	0.0758653	0.370537
HMGB3	0.234497	7.05543	0.0760032	0.37096
ANKHD1	0.366445	4.84082	0.0760585	0.370978
SSR4	0.182781	7.74627	0.0761619	0.370981
BCR	0.311492	5.75919	0.0761312	0.370981
TESMIN	0.28368	5.29263	0.0764537	0.3717
EMB	-0.349724	6.13367	0.0764267	0.3717
SIAH1	-0.356484	4.63445	0.0764644	0.3717
MEA1	0.195559	7.27695	0.0766416	0.372093
TGS1	-0.249125	6.01591	0.0766485	0.372093
USP34	0.226414	6.7902	0.0769372	0.37311
ACBD6	0.226733	6.67293	0.0769613	0.37311
APBA3	0.364774	4.68192	0.0771328	0.373439
DEF6	0.286528	5.31745	0.0770818	0.373439
CEP57	0.231157	6.54983	0.0772269	0.373644
SUGP2	0.207047	7.10966	0.0774077	0.374267
HOMER3	-0.186592	7.65444	0.0776239	0.374461
CCDC115	-0.249075	6.21522	0.0775002	0.374461
PDXDC1	-0.270967	5.95866	0.0776557	0.374461
NOL7	-0.171996	8.35286	0.0775872	0.374461
ZFC3H1	-0.260038	5.85408	0.0777691	0.374758
PKNOX1	0.31261	5.05149	0.0778349	0.374824
IFT27	-0.330796	4.71081	0.077967	0.375203
CNOT7	-0.173977	8.31046	0.0780176	0.375203
HUS1	0.302312	5.02938	0.078096	0.37533
CDC16	0.254834	5.95072	0.0782401	0.375618
PSMD4	-0.175388	8.09439	0.0782602	0.375618
BUB1	-0.210697	6.74381	0.0783276	0.375691
PI4KA	0.34664	4.78892	0.0786896	0.377176
AC004791.2	0.183187	8.07589	0.0789923	0.378376
ABHD10	0.247644	6.1059	0.0793428	0.379802
CCNA2	-0.178533	7.8623	0.0795885	0.380575
ASXL1	0.225349	6.49015	0.0796607	0.380575
NOG	-0.188836	7.94307	0.0796627	0.380575
DCAF17	0.365587	4.51659	0.0801797	0.38261
ING2	-0.227689	6.35351	0.0801947	0.38261
PRPF19	-0.210789	7.38881	0.0803289	0.382997
ATP5L	-0.160943	10.1367	0.0804286	0.383219
LASP1	-0.20015	7.16406	0.0804864	0.383241
KHNYN	0.247576	5.95338	0.0805654	0.383364
LSM7	-0.182809	7.85825	0.0808222	0.383826
TMEM19	0.300563	5.17052	0.0808074	0.383826
TYSND1	0.291709	5.53284	0.0807773	0.383826
SRPRB	-0.206697	7.43353	0.0809346	0.384106
NUP133	0.200841	6.99302	0.0810994	0.384271
AMMECR1L	0.269247	5.51546	0.0810542	0.384271
TSEN2	0.292437	5.09396	0.0811292	0.384271
RP11-760H22.2	0.33211	4.97072	0.0812025	0.384366
CCNE1	0.277057	5.79604	0.0814058	0.384622
ESPL1	0.325812	4.89072	0.0813174	0.384622
HPRT1	-0.195855	7.1142	0.0814167	0.384622
FOXO3	0.233305	6.23787	0.0815473	0.384987
IKBKB	0.304625	5.03912	0.0816962	0.385185
NRROS	-0.236352	6.26112	0.0816661	0.385185
TRAPPC1	-0.293951	5.08939	0.0819146	0.385962
LRFN1	-0.307823	5.17488	0.0820887	0.386278
RPS27A	-0.152258	11.4763	0.0820498	0.386278
FAM107B	-0.189467	7.37981	0.0824251	0.386957
NCK2	-0.250333	6.47062	0.0824478	0.386957
TGFB1	-0.37029	4.50852	0.0824352	0.386957
TMED3	-0.242159	6.19515	0.0823039	0.386957
BST2	-0.249777	5.85924	0.0825307	0.387094
RHBDF2	0.396782	4.56166	0.0828062	0.387415
OLA1	0.183834	8.13306	0.0827764	0.387415
CENPV	-0.24755	6.01644	0.0826561	0.387415
CUX1	0.190051	7.99018	0.0828141	0.387415
ADD1	0.228584	6.64685	0.0829275	0.387558
NEK1	-0.300562	5.07506	0.0829521	0.387558
DTX3L	-0.249973	5.87272	0.0830985	0.38799
PHKA2	0.282443	5.23595	0.0834462	0.388115
RAD23B	-0.177064	7.89903	0.0834067	0.388115
ABCB10	-0.277017	5.59392	0.0834109	0.388115
FIP1L1	-0.17888	7.8175	0.0834483	0.388115
SCUBE1	0.332078	5.10295	0.0832203	0.388115
CRELD2	-0.241169	5.99663	0.0834239	0.388115
ADNP	0.194621	7.29872	0.0835309	0.388249
MTSS1	0.180526	8.03422	0.0837487	0.38901
SPDL1	-0.221594	6.52809	0.0840142	0.389992
IMMT	0.18732	7.40614	0.0843644	0.391114
THAP5	-0.254326	5.86194	0.08432	0.391114
RAC3	-0.283774	5.65171	0.0845725	0.391827
MINOS1	0.208009	7.1546	0.0847275	0.392293
PTRH2	0.23952	6.24046	0.0848348	0.392538
AKIRIN1	-0.234469	6.36273	0.084947	0.392637
RPL37A	0.148745	11.4435	0.0849651	0.392637
ELK1	-0.277344	5.34503	0.0851275	0.393135
CKLF	-0.214068	6.54819	0.0852832	0.393602
PLCG2	-0.285017	5.84787	0.0853419	0.393621
TCHP	0.258319	5.71835	0.0854478	0.393858
RNF139	0.226159	6.51452	0.0855736	0.394185
TMEM242	-0.335431	4.86423	0.0856349	0.394216
PTCD3	0.181529	8.01909	0.0861017	0.396112
ERP44	-0.26129	5.87928	0.0865061	0.397212
FXR1	-0.200667	7.14927	0.086444	0.397212
RNF121	0.330716	4.87156	0.0864984	0.397212
ATXN7L3B	-0.219319	6.40728	0.0866831	0.397771
WIZ	0.278954	5.84915	0.0870057	0.397985
FAM32A	-0.172973	8.01003	0.0869866	0.397985
SLC35A5	-0.338277	4.68288	0.0869315	0.397985
TMEM183A	-0.289879	5.2215	0.0869694	0.397985
SLC35E2B	0.282452	5.89943	0.0868789	0.397985
BPGM	-0.29967	4.86696	0.0872473	0.398723
CEBPZOS	-0.25415	6.33022	0.0872777	0.398723
GAL	-0.240139	6.62999	0.0873674	0.39888
ZBTB1	-0.334166	4.46268	0.0877	0.399387
BNIP2	0.190921	7.34816	0.0876075	0.399387
F11R	-0.266474	5.44658	0.0876485	0.399387
ZNF518B	0.329444	4.65552	0.0876441	0.399387
ICAM3	0.215589	6.5484	0.087839	0.399726
KLC1	0.275028	6.06097	0.0878877	0.399726
ZNF580	0.350252	4.52913	0.0879409	0.399726
HDAC6	0.352877	4.43055	0.0881397	0.399975
DHX40	0.206271	7.16069	0.0883152	0.399975
FRG1	0.180578	8.23837	0.0883286	0.399975
EPC2	0.316991	4.79382	0.088229	0.399975
RRM1	-0.155958	9.28332	0.0882685	0.399975
POLR2G	0.189152	7.45306	0.0883114	0.399975
RITA1	0.262645	5.52528	0.0886531	0.400304
TSPAN3	-0.166223	8.34879	0.0887558	0.400304
CARM1	0.204872	6.89401	0.0885657	0.400304
LBR	-0.178752	8.34429	0.0887134	0.400304
RMI2	-0.306056	4.93875	0.0887898	0.400304
TRAPPC2	0.279794	5.30738	0.0885707	0.400304
HSPA1A	-0.177781	7.62638	0.0887508	0.400304
KNSTRN	-0.26204	5.83774	0.0889589	0.400816
SMC3	-0.220579	6.44479	0.0892487	0.401619
WDR27	0.349305	4.46267	0.0891987	0.401619
MRPS27	0.20316	7.57004	0.0894192	0.401645
NEDD8	0.181692	8.45417	0.0893715	0.401645
FAM213B	0.269197	5.44684	0.0894216	0.401645
EP400NL	0.303564	5.0653	0.0895899	0.40215
ARHGEF19	-0.302315	4.94352	0.0897135	0.402455
ERGIC2	-0.200779	7.05527	0.0901483	0.403718
CCNH	-0.264929	5.51419	0.090163	0.403718
ABL2	0.25229	5.81835	0.0901168	0.403718
MAP4K1	0.290423	5.06454	0.0903463	0.404186
CCDC112	-0.326227	4.9018	0.0903797	0.404186
NSUN4	0.252514	5.74962	0.0907845	0.405493
LYST	-0.24199	5.89882	0.0907703	0.405493
MRPL4	0.229086	6.58476	0.0908687	0.405618
RP11-429J17.2	0.314558	4.74484	0.0910645	0.40624
SQLE	-0.182582	7.44702	0.0912762	0.406681
NEAT1	0.313417	5.91336	0.091262	0.406681
MGST1	-0.193065	7.57615	0.0914843	0.407357
TROVE2	0.205091	7.02387	0.0916226	0.407718
PHF2	-0.276513	5.87866	0.0916785	0.407718
SNX9	-0.300196	5.11824	0.0918724	0.408328
METTL21A	0.354608	4.4328	0.0920836	0.409015
STAR	0.259964	5.55603	0.092158	0.409093
RPS6KA3	-0.211989	6.81915	0.0923655	0.409762
SEPHS1	-0.174456	7.7223	0.0926545	0.410663
COMMD7	0.200469	7.15792	0.0926826	0.410663
MTDH	0.175774	8.57916	0.0929272	0.411494
AZI2	-0.219261	6.40259	0.09306	0.411829
ALAS1	-0.364202	4.94061	0.0931659	0.412045
TOMM34	-0.19656	6.96993	0.093303	0.412304
PRMT1	-0.16877	8.24019	0.0933962	0.412304
DGAT1	0.355901	4.57726	0.0933778	0.412304
NOL9	-0.211764	6.55367	0.0934951	0.412488
FBXO30	-0.243207	5.98836	0.0936054	0.41251
C17orf62	0.26203	5.84695	0.0936145	0.41251
CENPBD1	0.274893	5.56112	0.0937578	0.41289
DDX55	-0.197935	6.88585	0.0938756	0.413156
BET1	-0.307041	5.18113	0.0942509	0.413545
SEC11A	-0.171302	8.38522	0.09415	0.413545
SHPRH	-0.345291	4.70311	0.0942119	0.413545
ZBED1	0.300247	5.1405	0.0942422	0.413545
ILF3-AS1	0.258707	5.48923	0.0942031	0.413545
STAT1	0.212659	6.72899	0.0944927	0.414102
GGA3	0.268832	5.45482	0.0944485	0.414102
NF1	0.292268	5.04361	0.0945621	0.414154
MLH3	0.258157	5.58544	0.0947077	0.41454
KIAA1549	0.312961	4.77659	0.0948349	0.414845
POLE3	-0.159316	8.79992	0.0949403	0.415055
ATP6V0E1	0.18635	7.67525	0.0952497	0.415312
NUP214	0.257125	5.77628	0.0953269	0.415312
SMG1	0.285343	5.6506	0.0950789	0.415312
KIAA1462	-0.274638	5.16802	0.0953449	0.415312
FAM220A	0.274976	5.29624	0.0951491	0.415312
ATXN2	0.210732	6.80926	0.0953256	0.415312
DNAJA2	-0.170001	8.52588	0.0958038	0.416749
SRRT	0.19922	7.57293	0.0958813	0.416749
GTPBP1	-0.264723	5.39865	0.095906	0.416749
RPL19	-0.171257	10.7102	0.0958442	0.416749
COX7A2	0.15764	9.06576	0.0964154	0.416751
EXOSC9	-0.182605	7.28021	0.0963154	0.416751
MKKS	0.312527	4.8549	0.0964233	0.416751
BCL10	-0.390569	4.42583	0.0964267	0.416751
MGST3	-0.240291	5.90928	0.0962438	0.416751
UBE3B	0.259092	5.48929	0.0960673	0.416751
EXT2	0.266837	5.21866	0.0960041	0.416751
NEU3	0.221191	6.32934	0.0960847	0.416751
PGAM5	-0.22263	6.78677	0.0963037	0.416751
KAT5	-0.229295	6.01034	0.0966071	0.41728
VCL	0.242563	6.0905	0.0966819	0.417353
MAP3K4	0.300775	5.62619	0.0968012	0.417368
EIF4A2	-0.165696	9.16174	0.0967815	0.417368
DDN	0.356556	4.34933	0.0969717	0.417854
AP2M1	0.181761	7.7928	0.0970919	0.418122
TCEB3	-0.234519	5.91979	0.0972167	0.418409
ZC3H7B	-0.225092	6.69879	0.0973628	0.418444
KHDRBS3	-0.235168	5.87934	0.0973991	0.418444
CABLES2	0.307	4.93702	0.0973798	0.418444
MSH2	-0.185187	7.30781	0.0977518	0.41971
THOC7	-0.18263	7.62804	0.0981279	0.421074
PTPN7	0.17308	7.60055	0.0982051	0.421154
STK10	0.299835	4.85373	0.0984225	0.421836
RAB31	0.219474	6.3514	0.098694	0.422748
DNAJC5	0.249141	5.75406	0.0990483	0.423009
WBP4	-0.245147	6.00295	0.0988969	0.423009
HOXD13	-0.202848	6.62165	0.0990237	0.423009
SMAD4	-0.249239	5.89395	0.0988569	0.423009
UTP23	-0.313506	4.97615	0.0990067	0.423009
RPUSD3	0.214446	6.76004	0.0992771	0.423735
SLC25A25	0.289677	5.01835	0.0994056	0.423782
YY1AP1	0.262396	5.9443	0.0993568	0.423782
TTYH3	-0.283543	5.74677	0.0995713	0.424237
PRR11	0.172259	8.52858	0.0996794	0.424447
NOP16	-0.206812	7.59885	0.0999617	0.424783
VEZF1	0.255755	5.89485	0.0999791	0.424783
VOPP1	0.346711	4.50878	0.0998769	0.424783
SNHG7	-0.179907	7.34469	0.099994	0.424783
TDP2	-0.340272	4.99375	0.100077	0.424886
EMC2	-0.239012	5.86792	0.100402	0.426014
PDIA5	-0.244468	5.8142	0.100611	0.426651
ENO1	0.144135	10.4946	0.100856	0.427162
FKBP15	0.32242	4.80969	0.10091	0.427162
ANKRD50	0.302902	4.96543	0.100815	0.427162
ANKRD13A	0.271151	5.33204	0.10103	0.42742
IGLL1	-0.171359	9.15402	0.101223	0.427986
E2F3	-0.20715	6.42954	0.101385	0.428419
TOPORS	-0.223232	6.10074	0.101516	0.428721
PPT1	-0.172524	7.77779	0.101849	0.429626
CPT2	0.282058	5.28475	0.101808	0.429626
CERS6	-0.178953	7.45207	0.102123	0.43053
LMO2	-0.266663	6.04744	0.102454	0.431671
PSEN1	0.262072	5.42161	0.102559	0.431794
SF3B2	0.17	7.78987	0.102616	0.431794
POM121C	0.296566	5.04226	0.102663	0.431794
PSMB1	0.170335	8.7668	0.102765	0.431877
G6PD	-0.296758	4.83726	0.102862	0.431877
SPTAN1	0.316117	4.8287	0.102811	0.431877
ATP6V1D	0.256114	5.49056	0.103021	0.431892
RCAN1	0.314068	4.8192	0.103045	0.431892
ZNF708	-0.342055	4.43768	0.103007	0.431892
LAPTM4A	-0.164054	8.79627	0.103244	0.432371
MIS12	-0.322819	4.6722	0.10328	0.432371
ELOVL5	0.179126	7.75954	0.103392	0.432589
GLCCI1	0.217788	6.81962	0.103507	0.432801
ACOT9	0.274315	5.3724	0.103563	0.432801
WSB1	-0.167279	7.73351	0.10381	0.433334
MT-ND5	-0.139208	10.6848	0.103761	0.433334
PPP6C	0.175136	7.51646	0.10388	0.433374
NAA38	0.214388	6.93236	0.104148	0.43424
IMP4	0.193942	6.9823	0.104274	0.434265
ALKBH2	-0.274667	5.16932	0.104237	0.434265
TMEM245	0.198198	6.63142	0.104368	0.434406
ZNF276	0.280366	5.28993	0.104541	0.434873
RBBP7	-0.171984	8.05471	0.104726	0.434916
TIMM8A	0.282749	5.07779	0.104732	0.434916
HHEX	-0.175851	7.38105	0.104656	0.434916
KLHL23	-0.210842	6.72076	0.105026	0.435886
TNK2	0.29678	4.96833	0.105276	0.436486
LRRC59	0.156357	8.65999	0.105474	0.436486
TARS	-0.176793	7.56036	0.105716	0.436486
SPCS2	-0.322886	4.75504	0.105624	0.436486
KBTBD7	0.224526	6.11249	0.105711	0.436486
VGLL4	0.25809	6.09296	0.10548	0.436486
DTYMK	0.247185	5.79236	0.105675	0.436486
FAM104B	-0.251085	5.61869	0.105478	0.436486
PRC1	0.231104	5.94895	0.105356	0.436486
UQCR10	0.179101	7.65553	0.10587	0.436873
MEF2C	0.164132	7.94699	0.106238	0.438139
MINA	0.243218	5.71786	0.106349	0.438347
IKZF2	-0.305926	5.12846	0.10689	0.438573
MYDGF	0.233528	7.20324	0.106853	0.438573
ARL2BP	-0.285657	5.84708	0.106639	0.438573
CACYBP	-0.148419	9.20228	0.106761	0.438573
SDF2L1	-0.234113	6.55352	0.106817	0.438573
LRRC14	0.279007	5.00678	0.106683	0.438573
HDHD2	0.237323	5.88371	0.106626	0.438573
ARHGAP45	-0.320649	4.48329	0.106864	0.438573
ELP2	0.194394	6.87052	0.106964	0.438626
NT5DC2	0.213471	6.77666	0.107137	0.439083
MMP25	0.198576	6.77328	0.1076	0.439626
PIK3C2A	-0.250143	5.36722	0.107333	0.439626
POP4	0.221764	6.4168	0.10762	0.439626
KIAA0922	-0.219871	6.20181	0.107598	0.439626
ZNF566	-0.30472	4.80531	0.107431	0.439626
SLC16A1-AS1	0.291111	4.96496	0.107635	0.439626
AP3M2	0.240191	5.72218	0.108576	0.442966
FAM173B	0.313539	4.80748	0.108517	0.442966
DDIT4	0.323102	4.49493	0.108691	0.443183
FLNA	-0.285403	5.35055	0.108752	0.443183
SLC26A2	-0.190968	6.84518	0.10887	0.443415
UBE3C	-0.190365	6.7796	0.109132	0.444232
DOCK6	0.362692	4.34742	0.10966	0.445878
RASL10B	-0.304965	4.76766	0.109604	0.445878
STAU1	0.192474	6.95956	0.109729	0.445905
RPL26L1	-0.279166	5.35296	0.110025	0.446858
TRAF3IP2	0.282917	4.92888	0.110091	0.446867
FRYL	0.20155	6.48634	0.110152	0.446867
DDA1	0.253057	5.34285	0.110382	0.447548
GAPDH	-0.1477	10.5105	0.110596	0.448165
HSPE1	0.15921	9.40829	0.110817	0.448807
FANCI	-0.209242	6.75485	0.110943	0.4489
BTBD10	-0.33331	4.70586	0.111089	0.4489
DHX37	0.329811	4.52926	0.111001	0.4489
OXA1L	0.172368	7.50994	0.11104	0.4489
DPAGT1	0.21867	6.04056	0.111586	0.450657
ARAF	0.292768	4.76563	0.111917	0.450736
ILF2	-0.17516	8.92386	0.111913	0.450736
PAFAH1B2	0.162317	7.87755	0.111918	0.450736
ARV1	0.239743	5.76437	0.111915	0.450736
ZNF655	0.225019	6.84791	0.111854	0.450736
ITGA6	-0.248413	5.79558	0.112131	0.450901
USF2	-0.225916	6.15361	0.112147	0.450901
ATF7IP	-0.210697	6.65997	0.11211	0.450901
PFKL	0.22666	6.19183	0.112314	0.451322
ATG5	-0.246014	5.59929	0.112386	0.45136
RNF20	0.236574	5.71398	0.112486	0.45151
IP6K1	0.234618	5.73729	0.112859	0.452503
ZFP90	0.325744	4.60926	0.112818	0.452503
POLR3H	0.226409	5.95904	0.11319	0.453578
MAP3K1	0.185045	7.17578	0.113345	0.453945
UQCRC1	0.187989	6.9112	0.113502	0.454323
PTPN23	0.27887	5.46992	0.113925	0.455257
GNPAT	0.20083	6.62012	0.113899	0.455257
TMX3	-0.262065	5.74397	0.113841	0.455257
TP53BP1	-0.245892	5.46898	0.114255	0.455661
COCH	0.172067	7.70158	0.114225	0.455661
SLC25A16	0.294737	4.73973	0.114292	0.455661
SMIM19	-0.304418	4.99864	0.114314	0.455661
PTPN11	-0.212377	6.52217	0.114342	0.455661
ELF2	-0.314569	5.12846	0.114881	0.456613
DCAF8	-0.220864	5.97797	0.114881	0.456613
SOD1	-0.141885	9.90976	0.114898	0.456613
LACTB2	-0.327901	4.44093	0.114652	0.456613
MAFG	-0.191614	6.83856	0.114823	0.456613
NOL8	-0.173711	7.32443	0.115202	0.457571
PEX3	-0.296476	4.96138	0.115393	0.457827
APITD1	-0.236776	5.72984	0.115365	0.457827
UHRF1BP1	0.271658	5.17035	0.115979	0.458135
RAB21	-0.196562	6.83061	0.115788	0.458135
VPS13C	-0.226071	6.02761	0.115568	0.458135
PUM1	-0.173055	7.37029	0.115973	0.458135
LARP4	-0.205764	6.39622	0.115602	0.458135
ZNF529	-0.267113	5.04793	0.115873	0.458135
SLC35B4	0.217266	6.33761	0.115907	0.458135
PRKDC	-0.185776	6.92634	0.11575	0.458135
ANKRD13D	0.319503	4.54775	0.116055	0.458183
SMARCA2	0.235383	6.06268	0.116208	0.458534
SAP30BP	0.213209	6.23548	0.116347	0.458833
ISYNA1	-0.301429	4.55584	0.116484	0.459122
KIF22	0.232372	6.00077	0.116578	0.459243
ZDHHC20	-0.256088	5.07286	0.116672	0.459359
LAS1L	0.235104	5.89812	0.117072	0.46062
NDUFA13	-0.306558	5.46298	0.11712	0.46062
RB1	-0.210316	6.7761	0.117184	0.460622
NDUFS2	-0.182526	7.12591	0.117254	0.460645
ASF1B	-0.210202	6.73906	0.11746	0.461055
RMI1	-0.225936	6.0337	0.11755	0.461055
MYADM	0.209145	6.7318	0.117498	0.461055
NR1H2	0.33727	4.4286	0.117752	0.4615
MRPS36	-0.20243	6.76941	0.117919	0.4615
STX6	-0.292599	5.05446	0.11792	0.4615
ZNF652	0.247079	5.53182	0.117909	0.4615
SIN3B	0.262469	5.14043	0.118224	0.462441
TMEM33	-0.172151	7.4567	0.118302	0.462496
TIMM21	-0.209547	6.59509	0.118501	0.463022
BFAR	-0.192005	6.76759	0.118602	0.463164
CCNL2	0.178064	7.6353	0.118753	0.463503
RLF	0.265127	6.06597	0.118942	0.463737
DDOST	-0.214444	6.23289	0.118926	0.463737
BRK1	-0.1859	7.29512	0.119177	0.464405
GDI2	0.153515	8.59674	0.119792	0.466295
PRKACA	0.347677	4.59341	0.119728	0.466295
NAA15	-0.176309	7.12144	0.12023	0.467498
ZNF777	-0.294894	4.77798	0.120206	0.467498
XPO4	-0.338315	4.61024	0.120408	0.467936
ZNF136	0.309295	4.64235	0.120481	0.467967
MAPRE2	-0.257761	5.30465	0.120613	0.468228
CBX1	-0.168334	7.88343	0.120696	0.468299
PQBP1	0.217306	6.09789	0.120865	0.468322
ACTR8	0.298073	4.79493	0.120916	0.468322
FARSB	0.193381	6.59096	0.120962	0.468322
CCNG2	-0.31535	4.67242	0.120839	0.468322
TBP	-0.263876	5.59274	0.121031	0.468336
PAK2	0.169926	7.38465	0.121284	0.469066
KLHL12	0.245851	5.56186	0.121544	0.469615
NAF1	-0.266805	5.12486	0.121557	0.469615
PARP6	0.294998	4.75872	0.121645	0.469705
CISH	0.244712	5.5177	0.121906	0.470208
TMEM87B	-0.285102	5.20415	0.121848	0.470208
SMNDC1	-0.197881	6.37562	0.122047	0.470349
PIP4K2A	0.203392	6.3708	0.122073	0.470349
HBP1	-0.308823	4.71638	0.122153	0.470408
PDPR	0.215005	6.69971	0.122689	0.470559
PACSIN2	0.251256	5.87744	0.122578	0.470559
POLR3G	-0.222441	5.89056	0.122538	0.470559
PARK7	0.146488	9.02394	0.123141	0.470559
ZNFX1	0.308974	5.38488	0.122964	0.470559
TBC1D14	-0.234474	5.58527	0.122898	0.470559
OSER1	0.239974	5.56105	0.122625	0.470559
KRAS	0.214848	6.55473	0.123215	0.470559
TIMM10	0.175318	7.20749	0.123194	0.470559
SECISBP2L	0.271157	5.2313	0.123124	0.470559
FTO	0.212428	6.19046	0.122495	0.470559
MEPCE	0.187899	6.84333	0.123084	0.470559
PDXK	0.22889	5.7557	0.122905	0.470559
PEAK1	0.280108	4.92457	0.123237	0.470559
PXMP2	0.279881	4.94705	0.122665	0.470559
C22orf29	0.232146	5.60296	0.122939	0.470559
SMIM10L1	-0.194314	6.90116	0.123499	0.471311
CHKA	-0.198308	6.59722	0.123818	0.472278
BDP1	-0.195059	6.49335	0.124145	0.473275
NDUFAF6	0.295501	4.86145	0.12439	0.473958
SCO1	0.251907	5.49602	0.124552	0.474323
NREP	0.19829	6.32137	0.124713	0.474686
TBCA	-0.159074	9.00176	0.124834	0.474896
CMAS	0.249849	6.04684	0.125283	0.476021
ARID3A	-0.206794	6.6265	0.125263	0.476021
RBBP5	0.203074	6.40214	0.125447	0.476021
RFK	-0.185417	6.76972	0.125334	0.476021
LRRK1	0.249769	5.24816	0.12546	0.476021
STIM2	-0.241452	5.23033	0.125549	0.476107
DYRK2	-0.212329	6.10713	0.125763	0.476431
ZNF503	-0.223662	5.90051	0.125766	0.476431
REEP5	-0.171304	7.184	0.126011	0.476837
B4GALNT1	0.317461	4.54137	0.126072	0.476837
FAM120AOS	0.195195	6.55549	0.126031	0.476837
LSG1	0.19502	6.7511	0.126341	0.477025
MBD3	0.204218	6.54998	0.126404	0.477025
CNOT2	0.169431	7.42441	0.126826	0.477025
TRERF1	-0.259538	5.28653	0.126611	0.477025
PPP1R15B	-0.231416	5.62102	0.126732	0.477025
PIGX	0.225018	6.08264	0.126739	0.477025
PGM2	0.209146	6.50818	0.126849	0.477025
MFSD4B	0.265577	5.2648	0.126758	0.477025
SART1	-0.290671	5.04211	0.126279	0.477025
TUBB	-0.132149	10.5418	0.126295	0.477025
C1orf122	-0.249263	5.31705	0.126639	0.477025
MXI1	-0.249972	5.58536	0.127006	0.477118
VPS26B	0.184337	6.75034	0.127005	0.477118
AC013461.1	0.177574	7.44719	0.127482	0.478657
IBTK	0.189232	6.85048	0.12769	0.479042
CLEC5A	0.171619	7.39854	0.127718	0.479042
GTF3C2	0.203971	6.42628	0.127962	0.479709
AADAT	-0.261531	4.93725	0.128045	0.479768
CPSF3	0.184097	6.93209	0.128281	0.480403
RCN2	-0.163001	7.80044	0.128636	0.481483
HNRNPC	-0.14685	8.44917	0.128909	0.48218
CANT1	0.196924	6.69926	0.128956	0.48218
DGKD	0.243709	5.4293	0.129824	0.48392
LUC7L3	-0.134936	10.1399	0.129655	0.48392
OCIAD1	-0.168423	7.82144	0.129606	0.48392
SLC6A6	-0.281986	5.24112	0.129554	0.48392
RFC3	0.195725	6.54609	0.129714	0.48392
METTL12	-0.345677	4.50841	0.129812	0.48392
PRPF38B	-0.16778	7.1907	0.129905	0.483973
CTTN	-0.249581	5.16819	0.130423	0.484765
MAGOHB	-0.2077	6.1361	0.130443	0.484765
EPC1	0.167624	7.61536	0.130589	0.484765
PIN1	0.19908	6.2518	0.130487	0.484765
SHFM1	-0.141671	9.33414	0.130343	0.484765
ANKRD52	0.279447	4.98035	0.130316	0.484765
GHITM	0.153229	8.40404	0.130526	0.484765
PDCD2	0.159418	7.60064	0.13066	0.484781
PNKD	0.221036	6.25417	0.130982	0.485607
PATL1	-0.200651	6.46534	0.131018	0.485607
OGFOD3	-0.201339	6.34061	0.131155	0.485868
ATP1B1	0.325999	4.53815	0.131336	0.486037
C4orf3	-0.234522	6.29448	0.131314	0.486037
SUPT5H	0.220992	5.89311	0.131407	0.486052
EEF1B2	-0.14265	8.8929	0.131733	0.48687
DKC1	-0.145381	9.13221	0.131764	0.48687
PTBP1	0.141239	9.034	0.132202	0.487233
ACAA1	0.241898	5.50016	0.132066	0.487233
STAG2	-0.162132	7.41172	0.132335	0.487233
NT5C3A	-0.19069	6.5662	0.132064	0.487233
ZC3H4	0.199618	6.92222	0.132322	0.487233
NUDT16L1	0.190934	6.70348	0.132229	0.487233
ZNF24	0.160166	7.95759	0.13196	0.487233
MED12	0.303942	4.41701	0.132407	0.487249
TSPAN14	-0.219221	6.12825	0.132589	0.487423
WASF2	0.1707	7.5554	0.132526	0.487423
FMC1	-0.244227	5.45872	0.132824	0.488038
PCK2	0.267468	5.10867	0.133026	0.488419
TBL1X	0.244246	5.67095	0.133199	0.488419
RPL7A	-0.13149	10.9605	0.133126	0.488419
BPNT1	-0.292007	4.65237	0.133195	0.488419
QKI	-0.152653	7.89192	0.13335	0.488461
TMEM5	-0.272256	5.19184	0.133414	0.488461
PTTG1IP	0.157986	7.66424	0.133373	0.488461
BRCA1	0.188389	6.74091	0.133681	0.489192
RECQL4	-0.209206	6.09661	0.133888	0.489701
AP2S1	-0.205762	6.69266	0.134319	0.489977
NDUFB2	0.15017	8.43013	0.134611	0.489977
NRDE2	0.223175	5.83608	0.134578	0.489977
TTC21B	-0.314335	4.54502	0.134698	0.489977
PNISR	-0.149766	9.11288	0.134759	0.489977
PARVG	0.34822	4.63324	0.134748	0.489977
TEX30	-0.170671	7.03131	0.134662	0.489977
BAIAP2	0.307869	4.70944	0.134826	0.489977
CEP63	0.254463	5.08346	0.134792	0.489977
PIGP	0.230623	5.60008	0.134847	0.489977
HEXIM1	-0.213681	5.93275	0.134503	0.489977
TXNRD1	-0.189087	6.9928	0.134789	0.489977
SMIM3	0.192929	7.24155	0.134054	0.489977
HARS	0.247215	5.43584	0.135272	0.491272
SASS6	0.239217	5.6344	0.135475	0.491762
DNAJB6	-0.190718	6.89423	0.135574	0.491872
SURF1	0.235224	5.38354	0.135761	0.492303
KNOP1	0.161807	7.45131	0.136136	0.49272
PYROXD1	0.313187	4.45281	0.136149	0.49272
FHL3	0.304266	4.59632	0.136093	0.49272
RPL12	0.137037	9.49243	0.136042	0.49272
HBQ1	0.264592	4.93593	0.136425	0.492975
SRP54	-0.194828	6.37643	0.136388	0.492975
SRP19	-0.20605	6.17203	0.136421	0.492975
KIAA1551	-0.296671	4.47253	0.136708	0.493752
PSMG2	-0.18174	6.93728	0.136821	0.493914
AC009948.5	-0.322418	4.62805	0.136912	0.493994
C11orf96	0.322566	4.51749	0.137213	0.49483
[truncated: 5,210 more rows]

## Sheet: R packages
package	loadedversion	source	reference
ashr	'2.2-63'	'CRAN (R 4.4.1)'	https://github.com/stephens999/ashr
clusterProfiler	4.13.4'	Bioconductor 3.20 (R 4.4.1)	Yu G (2024). “Thirteen years of clusterProfiler.” The Innovation, 5(6), 100722. doi:10.1016/j.xinn.2024.100722, https://doi.org/10.1016/j.xinn.2024.100722.; Xu S, Hu E, Cai Y, Xie Z, Luo X, Zhan L, Tang W, Wang Q, Liu B, Wang R, Xie W, Wu T, Xie L, Yu G (2024). “Using clusterProfiler to characterize multiomics data.” Nature Protocols, 19(11), 3292-3320. doi:10.1038/s41596-024-01020-z, https://www…
ComplexHeatmap	'2.22.0'	'Bioconductor 3.20 (R 4.4.1)'	Gu Z, Eils R, Schlesner M (2016). “Complex heatmaps reveal patterns and correlations in multidimensional genomic data.” Bioinformatics. doi:10.1093/bioinformatics/btw313.; Gu Z (2022). “Complex Heatmap Visualization.” iMeta. doi:10.1002/imt2.43.
DESeq2	'1.46.0'	'Bioconductor 3.20 (R 4.4.1)'	Love MI, Huber W, Anders S (2014). “Moderated estimation of fold change and dispersion for RNA-seq data with DESeq2.” Genome Biology, 15, 550. doi:10.1186/s13059-014-0550-8.
EnhancedVolcano	'1.24.0'	'Bioconductor 3.20 (R 4.4.1)'	Blighe K, Rana S, Lewis M (2025). EnhancedVolcano: Publication-ready volcano plots with enhanced colouring and labeling. doi:10.18129/B9.bioc.EnhancedVolcano, R package version 1.28.2, https://bioconductor.org/packages/EnhancedVolcano.
eulerr	'7.0.2'	'CRAN (R 4.4.1)'	Larsson, J., & Gustafsson, P. (2018). A case study in fitting area-proportional Euler diagrams with ellipses using eulerr. Proceedings of International Workshop on Set Visualization and Reasoning, 2116, 84–91. http://ceur-ws.org/Vol-2116/paper7.pdf
fgsea	'1.32.4'	'Bioconductor 3.20 (R 4.4.1)'	Korotkevich G, Sukhov V, Sergushichev A (2019). “Fast gene set enrichment analysis.” bioRxiv. doi:10.1101/060012, http://biorxiv.org/content/early/2016/06/20/060012.
GenomicAlignments	'1.42.0'	'Bioconductor 3.20 (R 4.4.1)'	Lawrence M, Huber W, Pagès H, Aboyoun P, Carlson M, Gentleman R, Morgan M, Carey V (2013). “Software for Computing and Annotating Genomic Ranges.” PLoS Computational Biology, 9. doi:10.1371/journal.pcbi.1003118, http://www.ploscompbiol.org/article/info%3Adoi%2F10.1371%2Fjournal.pcbi.1003118.
GenomicFeatures	'1.58.0'	Bioconductor 3.20 (R 4.4.1)	Lawrence M, Huber W, Pagès H, Aboyoun P, Carlson M, Gentleman R, Morgan M, Carey V (2013). “Software for Computing and Annotating Genomic Ranges.” PLoS Computational Biology, 9. doi:10.1371/journal.pcbi.1003118, http://www.ploscompbiol.org/article/info%3Adoi%2F10.1371%2Fjournal.pcbi.1003118.
GenomicRanges	'1.58.0'	'Bioconductor 3.20 (R 4.4.1)'	Lawrence M, Huber W, Pagès H, Aboyoun P, Carlson M, Gentleman R, Morgan M, Carey V (2013). “Software for Computing and Annotating Genomic Ranges.” PLoS Computational Biology, 9. doi:10.1371/journal.pcbi.1003118, http://www.ploscompbiol.org/article/info%3Adoi%2F10.1371%2Fjournal.pcbi.1003118.
ggplot2	'3.5.2'	'CRAN (R 4.4.1)'	Wickham H (2016). ggplot2: Elegant Graphics for Data Analysis. Springer-Verlag New York. ISBN 978-3-319-24277-4, https://ggplot2.tidyverse.org.
impute	'1.80.0'	'Bioconductor 3.20 (R 4.4.1)'	Hastie T, Tibshirani R, Narasimhan B, Chu G (2025). impute: impute: Imputation for microarray data. doi:10.18129/B9.bioc.impute, R package version 1.84.0, https://bioconductor.org/packages/impute.
IRanges	'2.40.1'	'Bioconductor 3.20 (R 4.4.1)'	Lawrence M, Huber W, Pagès H, Aboyoun P, Carlson M, Gentleman R, Morgan M, Carey V (2013). “Software for Computing and Annotating Genomic Ranges.” PLoS Computational Biology, 9. doi:10.1371/journal.pcbi.1003118, http://www.ploscompbiol.org/article/info%3Adoi%2F10.1371%2Fjournal.pcbi.1003118.
limma	'3.62.2'	'Bioconductor 3.20 (R 4.4.1)'	Ritchie ME, Phipson B, Wu D, Hu Y, Law CW, Shi W, Smyth GK (2015). “limma powers differential expression analyses for RNA-sequencing and microarray studies.” Nucleic Acids Research, 43(7), e47. doi:10.1093/nar/gkv007.
openxlsx	'4.2.8'	'CRAN (R 4.4.1)'	Schauberger P, Walker A (2025). openxlsx: Read, Write and Edit xlsx Files. R package version 4.2.8, https://ycphs.github.io/openxlsx/index.html.
Rsamtools	'2.22.0'	'Bioconductor 3.20 (R 4.4.1)'	Morgan M, Pagès H, Obenchain V, Hayden N (2025). Rsamtools: Binary alignment (BAM), FASTA, variant call (BCF), and tabix file import. doi:10.18129/B9.bioc.Rsamtools, R package version 2.26.0, https://bioconductor.org/packages/Rsamtools.
rtracklayer	'1.66.0'	'Bioconductor 3.20 (R 4.4.1)'	Lawrence M, Gentleman R, Carey V (2009). “rtracklayer: an R package for interfacing with genome browsers.” Bioinformatics, 25, 1841-1842. doi:10.1093/bioinformatics/btp328, http://bioinformatics.oxfordjournals.org/content/25/14/1841.abstract.
survival	'3.8-3'	'CRAN (R 4.4.1)'	Therneau T (2024). A Package for Survival Analysis in R. R package version 3.8-3, https://CRAN.R-project.org/package=survival.
survivalAnalysis	'0.4.0'	'CRAN (R 4.4.1)'	https://rdocumentation.org/packages/survivalAnalysis/versions/0.4.0
survminer	'0.5.0'	'CRAN (R 4.4.1)'	Kassambara A, Kosinski M, Biecek P (2025). survminer: Drawing Survival Curves using 'ggplot2'. R package version 0.5.1, https://rpkgs.datanovia.com/survminer/index.html.
topGO	'2.58.0'	'Bioconductor 3.20 (R 4.4.1)'	Alexa A, Rahnenführer J (2025). topGO: Enrichment Analysis for Gene Ontology. doi:10.18129/B9.bioc.topGO, R package version 2.62.0, https://bioconductor.org/packages/topGO.
